# Supplementary material for: Insights into acid dissociation of HCl and HBr with internal electric fields
Source: Royal Society of Chemistry journal article supplement (doi:10.1039/c6cp08870h), 2017-01-01
Supplement: c6cp08870h1.pdf [file c6cp08870h1.pdf]

Electronic Supplementary Information for

## Insights into Acid Dissociation with Internal Electric Fields

Manjusha Boda<sup>a</sup> and G. Naresh Patwari<sup>\*a</sup>

<sup>a</sup> Department of Chemistry, Indian Institute of Technology Bombay, Powai, Mumbai 400 076  
India

E-mail: naresh@chem.iitb.ac.in

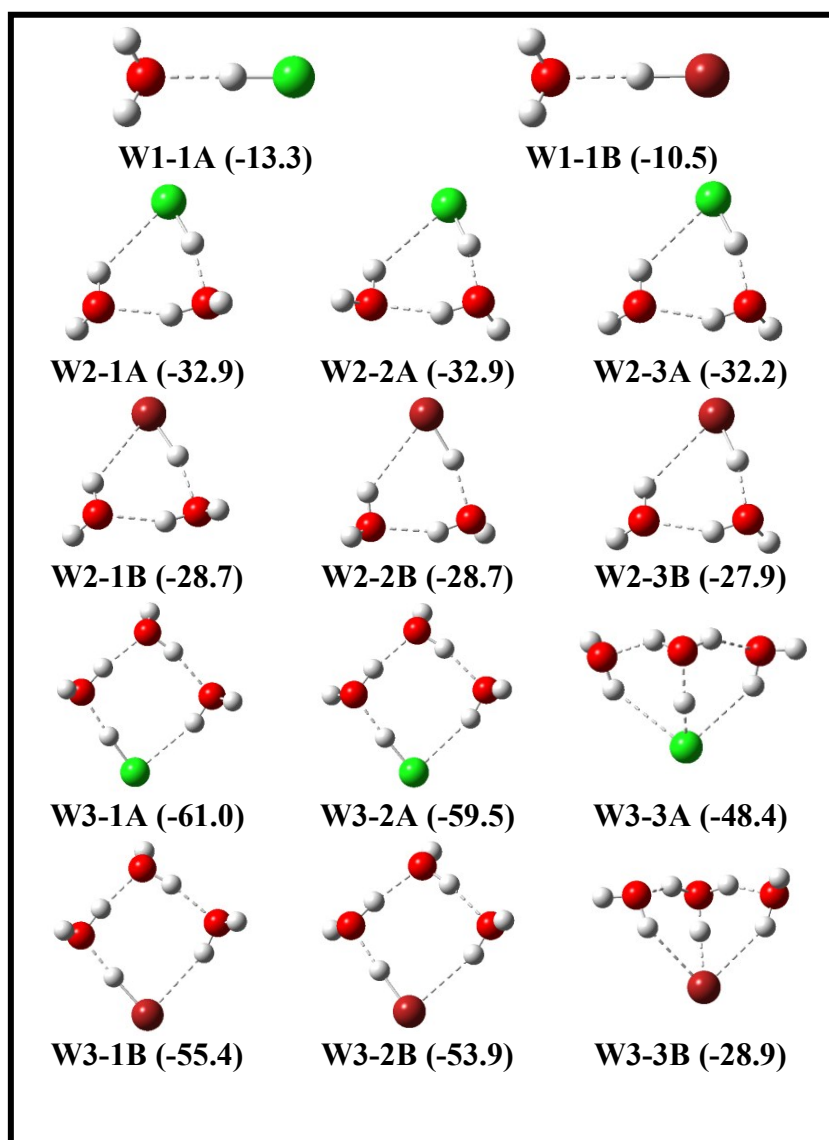

**Fig. S1.** Optimized structures of  $\text{HCl}-(\text{H}_2\text{O})_{1-3}$  and  $\text{HBr}-(\text{H}_2\text{O})_{1-3}$  clusters. The stabilization energies calculated at MP2/aug-cc-pVDZ level are shown in parenthesis. The structures with labels ending with A and B denote water clusters of HCl and HBr, respectively.

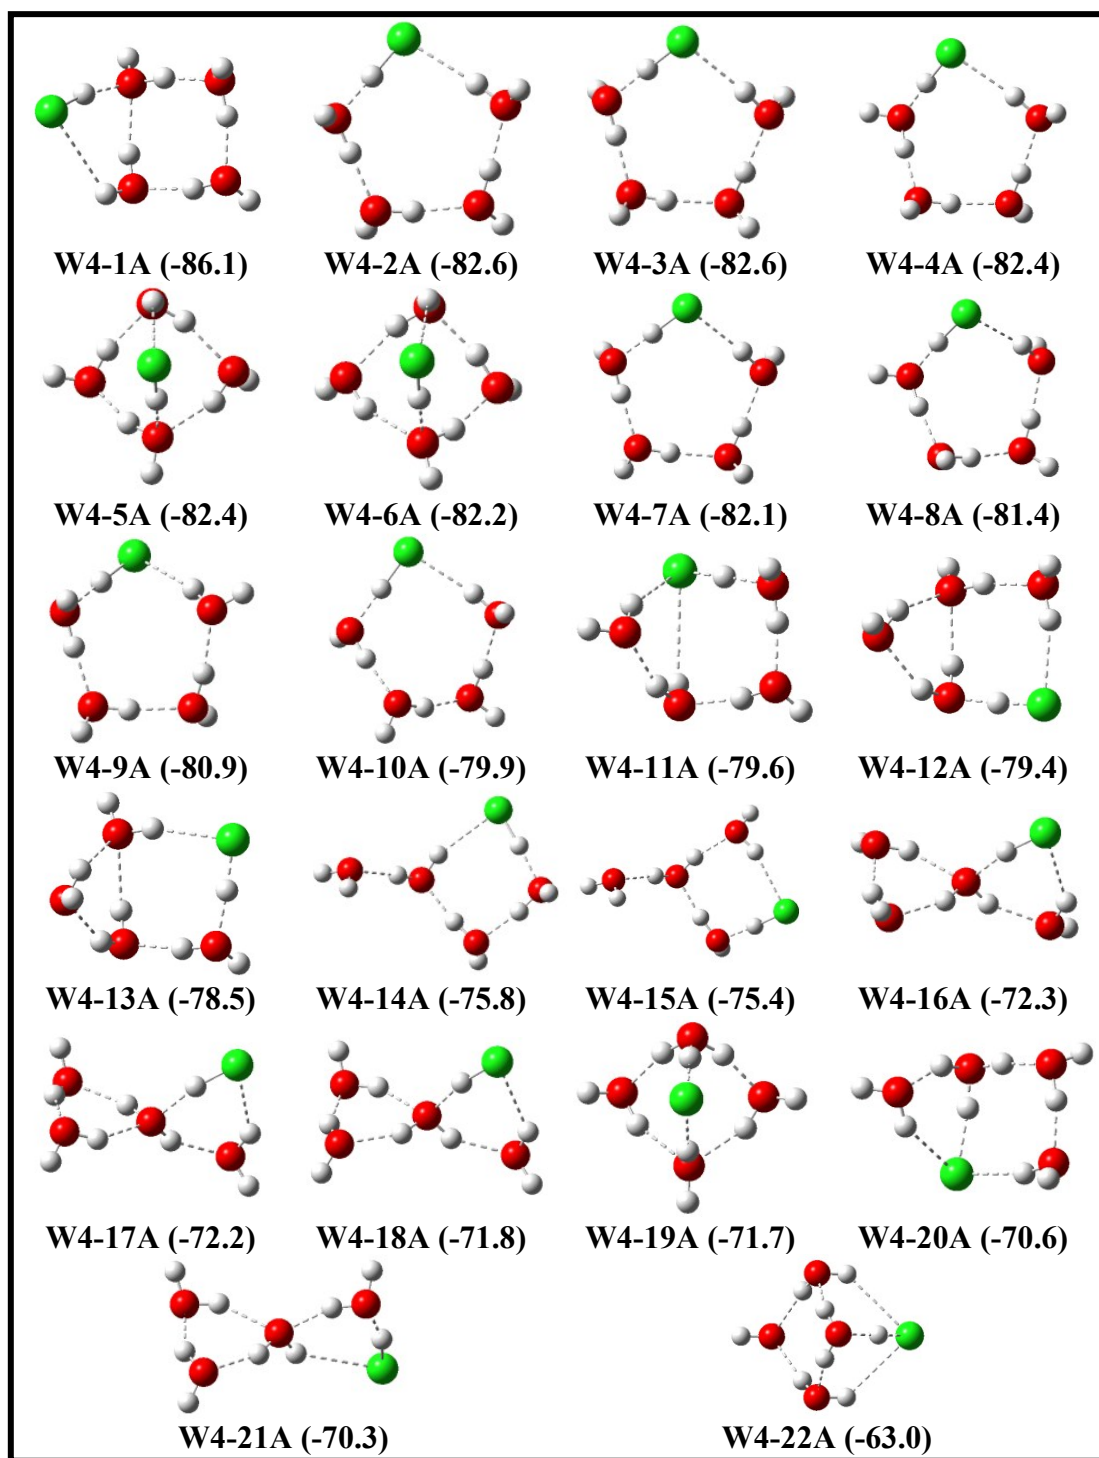

**Fig. S2.** Optimized structures of HCl-(H<sub>2</sub>O)<sub>4</sub> cluster. The stabilization energies calculated at MP2/aug-cc-pVDZ level are shown in parenthesis.

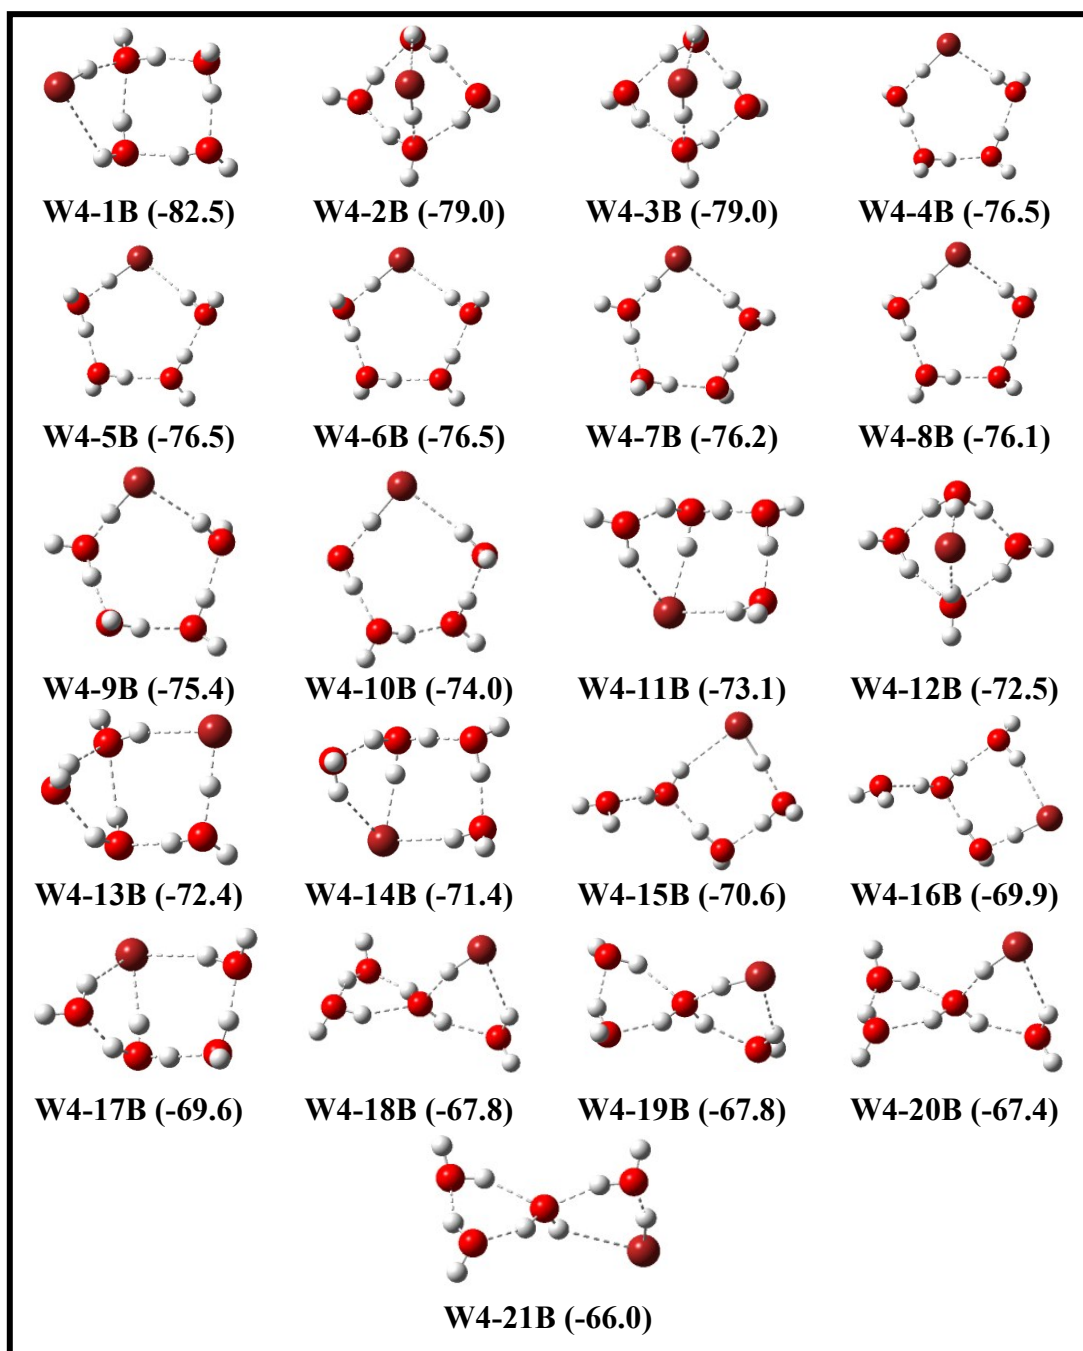

**Fig. S3.** Optimized structures of  $\text{HBr}-(\text{H}_2\text{O})_4$  cluster. The stabilization energies calculated at MP2/aug-cc-pVDZ level are shown in parenthesis.

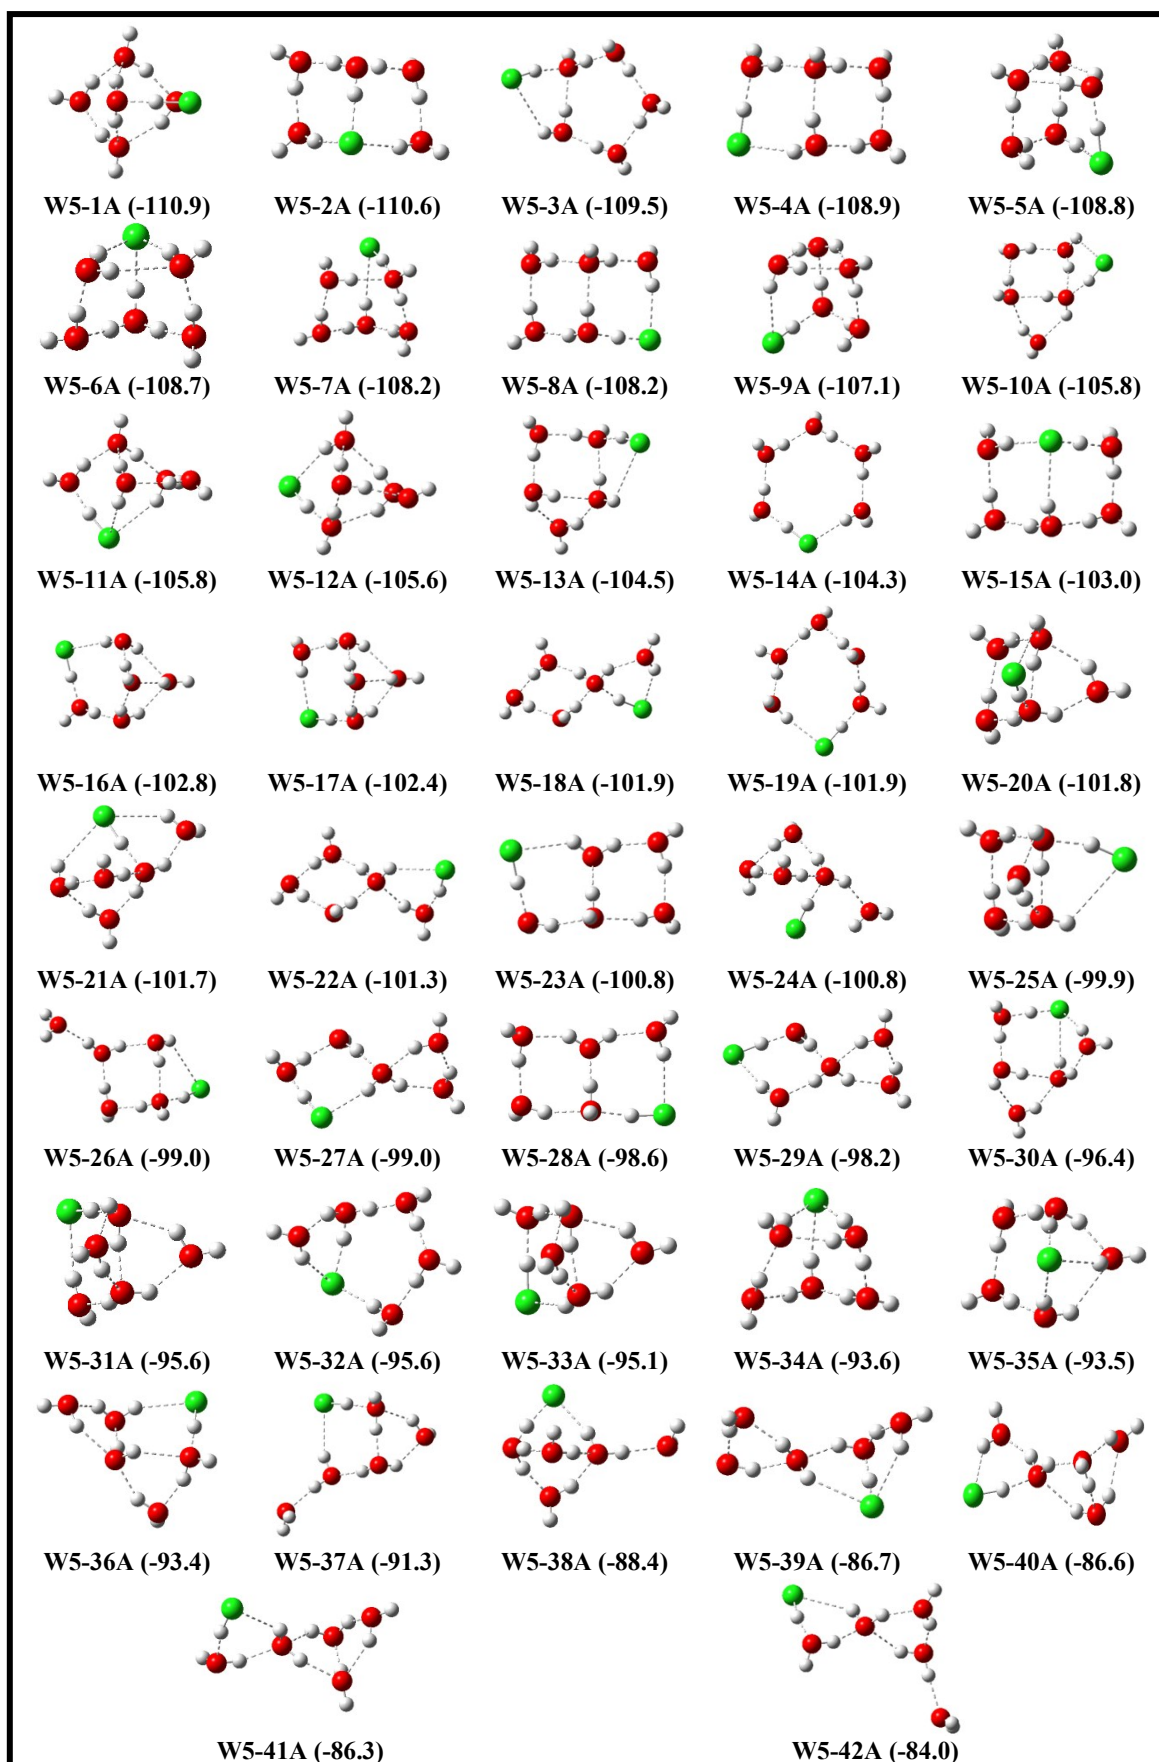

**Fig. S4.** Optimized structures of  $\text{HCl}-(\text{H}_2\text{O})_5$  cluster. The stabilization energies calculated at MP2/aug-cc-pVDZ level are shown in parenthesis.

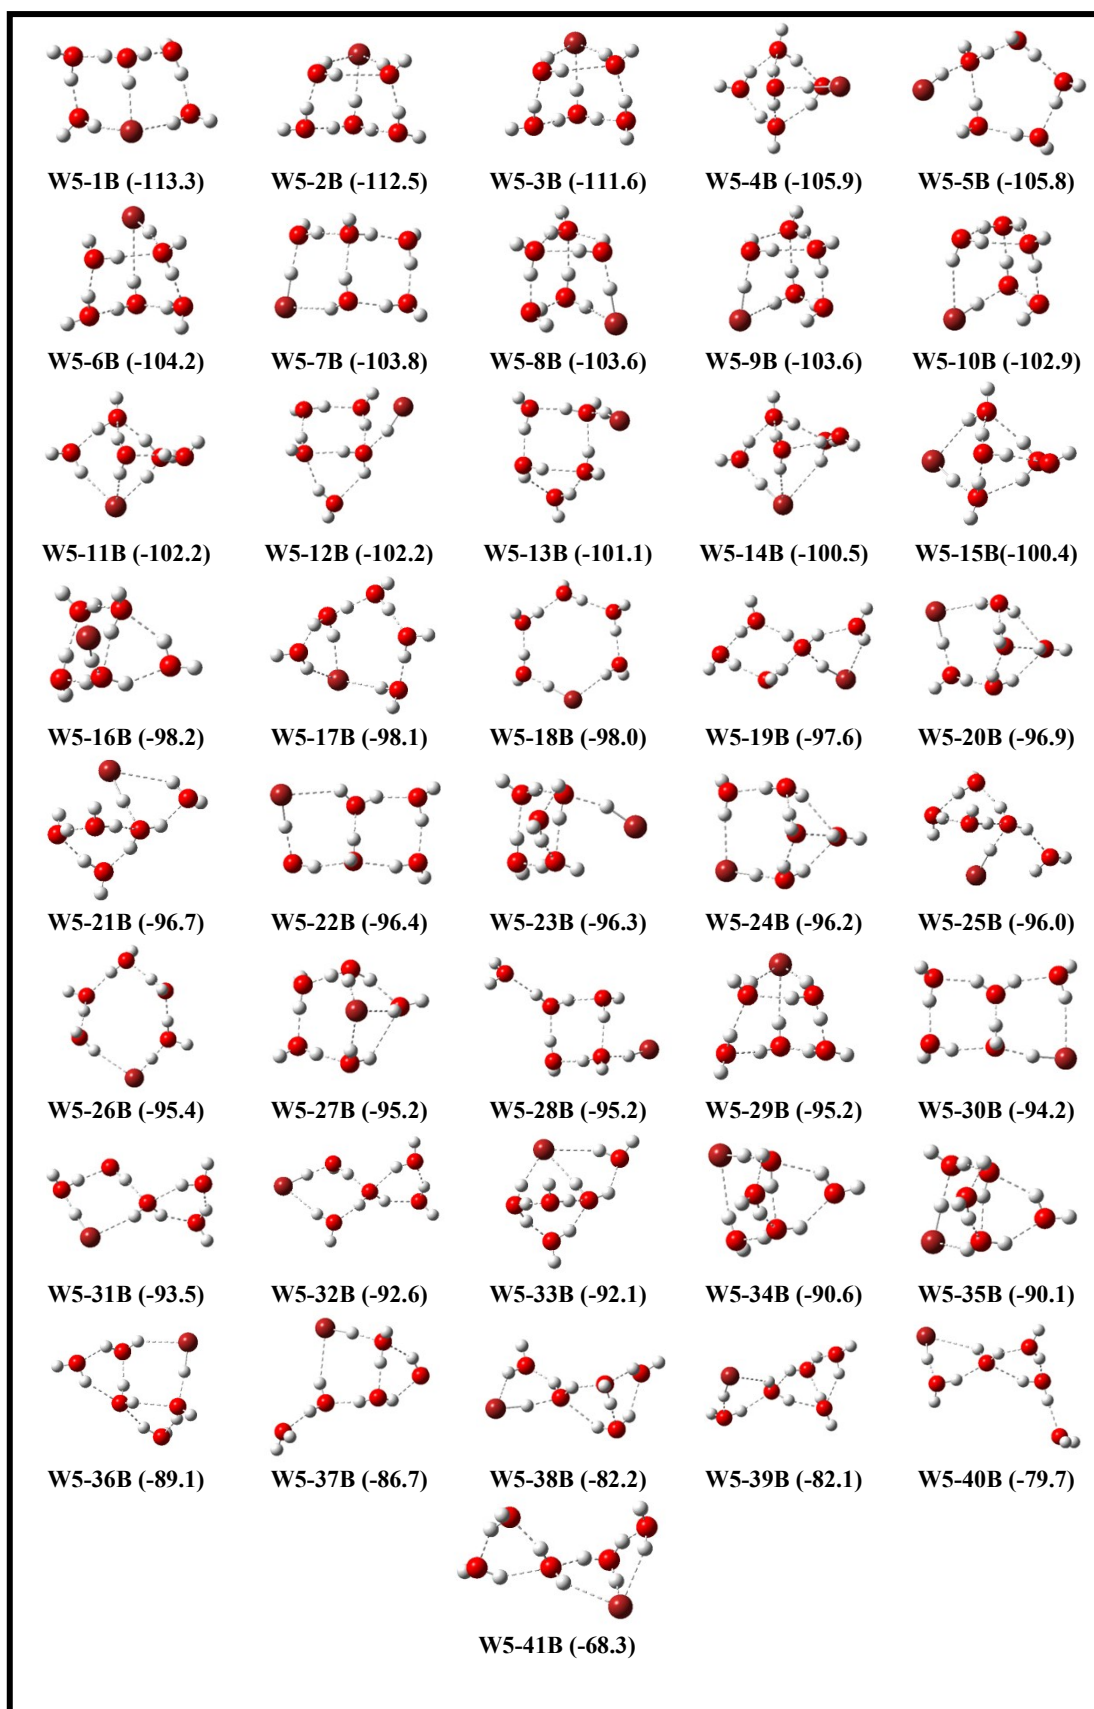

**Fig. S5.** Optimized structures of  $\text{HBr}-(\text{H}_2\text{O})_5$  cluster. The stabilization energies calculated at MP2/aug-cc-pVDZ level are shown in parenthesis.

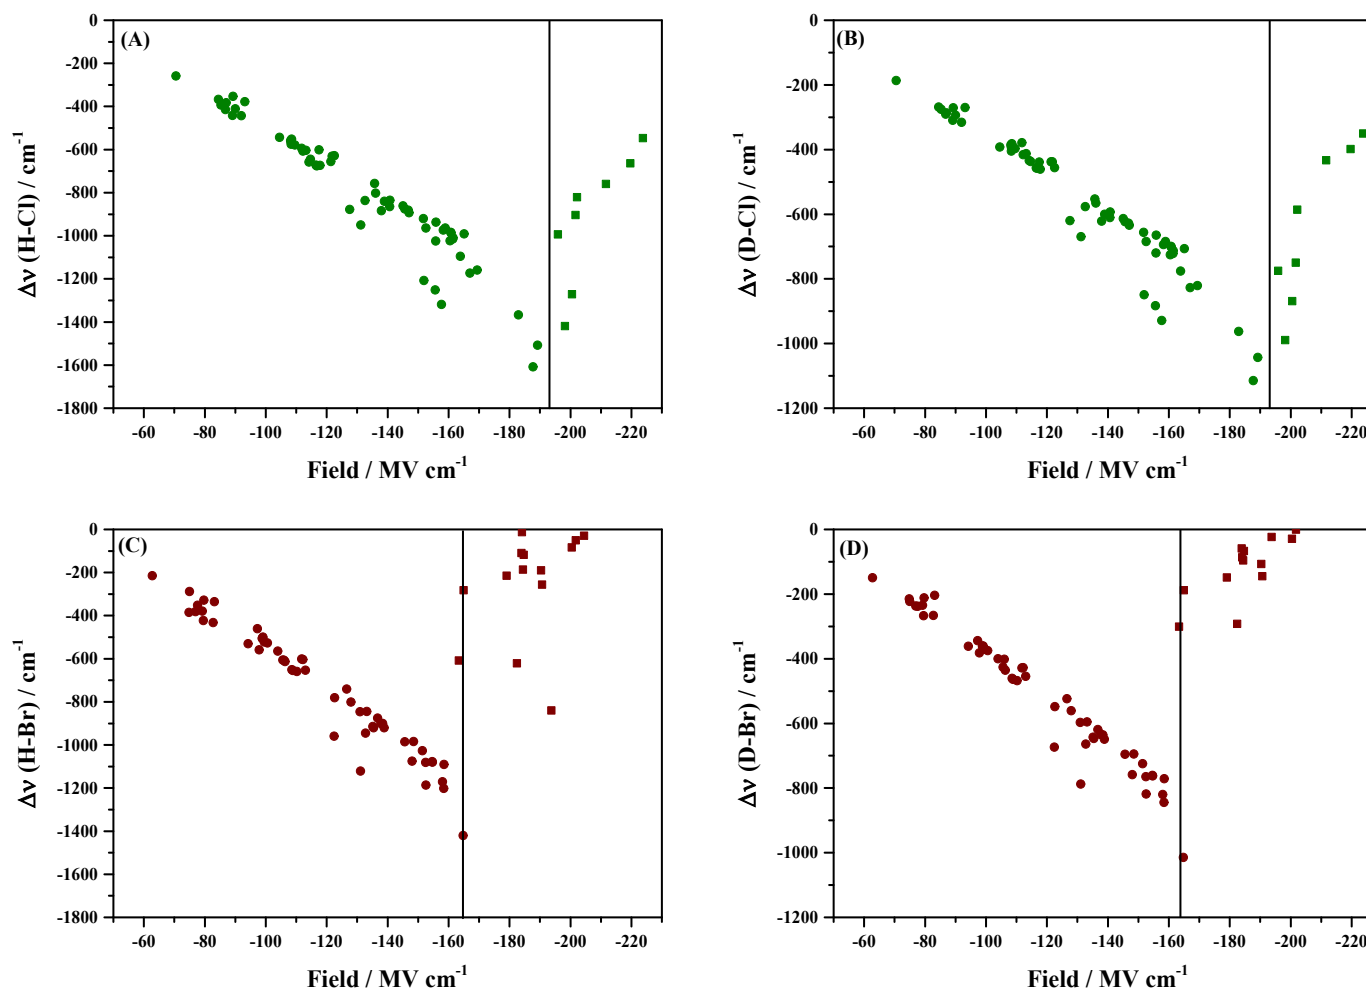

**Fig. S6.** Plot of red-shift in the X–H stretching frequencies against electric field calculated at MP2/aug-cc-pVDZ level for (A) HCl–(D<sub>2</sub>O)<sub>1-5</sub>, (B) DCl–(H<sub>2</sub>O)<sub>1-5</sub>, (C) HBr–(D<sub>2</sub>O)<sub>1-5</sub>, and (D) DBr–(H<sub>2</sub>O)<sub>1-5</sub> clusters. The vertical line at about 193  $\text{MV cm}^{-1}$  for HCl/DCl clusters and at about 163  $\text{MV cm}^{-1}$  for HBr/DBr clusters separates the region of reversal in the frequency shift trend.

**Table S1: ZPE and BSSE corrected stabilization energy (kJ mol<sup>-1</sup>), unscaled vibrational frequencies and their shifts (cm<sup>-1</sup>) for hydrogen bonded H-Cl molecule in HCl-(H<sub>2</sub>O)<sub>1-5</sub> clusters, for D-Cl molecule in DCl-(H<sub>2</sub>O)<sub>1-5</sub> clusters and for H-Cl molecule in HCl-(D<sub>2</sub>O)<sub>1-5</sub> clusters calculated at the MP2/aug-cc-pVDZ level of theory.**

| Structure | $\Delta E$ | $\nu$                | $\Delta\nu$          | $\nu$                | $\Delta\nu$          | $\nu$                | $\Delta\nu$          |
|-----------|------------|----------------------|----------------------|----------------------|----------------------|----------------------|----------------------|
|           |            | HCl/H <sub>2</sub> O | HCl/H <sub>2</sub> O | DCl/H <sub>2</sub> O | DCl/H <sub>2</sub> O | HCl/D <sub>2</sub> O | HCl/D <sub>2</sub> O |
| W1-1A     | -13.3      | 2761                 | -264                 | 1982                 | -187                 | 2765                 | -259                 |
| W2-1A     | -32.9      | 2478                 | -547                 | 1784                 | -386                 | 2465                 | -559                 |
| W2-2A     | -32.9      | 2478                 | -547                 | 1784                 | -386                 | 2466                 | -559                 |
| W2-3A     | -32.2      | 2483                 | -542                 | 1787                 | -382                 | 2473                 | -552                 |
| W3-1A     | -61.0      | 2156                 | -869                 | 1541                 | -628                 | 2142                 | -882                 |
| W3-2A     | -59.5      | 2177                 | -848                 | 1555                 | -614                 | 2164                 | -861                 |
| W3-3A     | -48.4      | 1784                 | -1241                | 1787                 | -883                 | 1773                 | -1252                |
| W4-1A     | -86.1      | 2610                 | -414                 | 1879                 | -291                 | 2610                 | -415                 |
| W4-2A     | -82.6      | 2056                 | -968                 | 1470                 | -700                 | 2041                 | -984                 |
| W4-3A     | -82.6      | 2053                 | -972                 | 1467                 | -702                 | 2037                 | -987                 |
| W4-4A     | -82.4      | 2067                 | -958                 | 1475                 | -694                 | 2051                 | -974                 |
| W4-5A     | -82.4      | 2606                 | -418                 | 1875                 | -294                 | 2613                 | -411                 |
| W4-6A     | -82.2      | 2633                 | -392                 | 1894                 | -276                 | 2631                 | -394                 |
| W4-7A     | -82.1      | 2074                 | -951                 | 1484                 | -685                 | 2060                 | -965                 |
| W4-8A     | -81.4      | 2077                 | -948                 | 1484                 | -685                 | 2061                 | -964                 |
| W4-9A     | -80.9      | 2104                 | -921                 | 1444                 | -726                 | 2000                 | -1024                |
| W4-10A    | -79.9      | 2101                 | -924                 | 1504                 | -665                 | 2088                 | -937                 |
| W4-11A    | -79.6      | 1884                 | -1141                | 1348                 | -821                 | 1865                 | -1160                |
| W4-12A    | -79.4      | 1857                 | -1167                | 1342                 | -827                 | 1850                 | -1174                |
| W4-13A    | -78.5      | 1947                 | -1077                | 1394                 | -776                 | 1929                 | -1096                |
| W4-14A    | -75.8      | 2207                 | -818                 | 1576                 | -593                 | 2190                 | -835                 |
| W4-15A    | -75.4      | 2019                 | -1005                | 1449                 | -720                 | 2000                 | -1025                |
| W4-16A    | -72.3      | 2365                 | -659                 | 1711                 | -458                 | 2349                 | -676                 |
| W4-17A    | -72.2      | 2367                 | -657                 | 1712                 | -457                 | 2351                 | -673                 |
| W4-18A    | -71.8      | 2396                 | -628                 | 1732                 | -437                 | 2380                 | -645                 |
| W4-19A    | -71.7      | 1769                 | -1255                | 1301                 | -869                 | 1752                 | -1272                |
| W4-20A    | -70.6      | 2181                 | -844                 | 1583                 | -586                 | 2204                 | -821                 |
| W4-21A    | -70.3      | 2461                 | -564                 | 1772                 | -397                 | 2445                 | -579                 |
| W4-22A    | -63.0      | 1823                 | -1201                | 1320                 | -849                 | 1817                 | -1208                |
| W5-1A     | -110.9     | 2148                 | -877                 | 1547                 | -622                 | 2140                 | -884                 |
| W5-2A     | -110.6     | 2423                 | -601                 | 1819                 | -351                 | 2478                 | -547                 |
| W5-3A     | -109.5     | 2583                 | -442                 | 1859                 | -310                 | 2582                 | -442                 |
| W5-4A     | -108.9     | 2392                 | -632                 | 1731                 | -438                 | 2369                 | -656                 |
| W5-5A     | -108.8     | 2168                 | -856                 | 1559                 | -611                 | 2160                 | -865                 |
| W5-6A     | -108.7     | 2352                 | -672                 | 1771                 | -399                 | 2361                 | -664                 |
| W5-7A     | -108.2     | 2462                 | -562                 | 1777                 | -392                 | 2480                 | -544                 |
| W5-8A     | -108.2     | 1411                 | -1614                | 1054                 | -1115                | 1417                 | -1608                |
| W5-9A     | -107.1     | 2441                 | -584                 | 1764                 | -405                 | 2459                 | -566                 |
| W5-10A    | -105.8     | 2639                 | -385                 | 1899                 | -271                 | 2672                 | -353                 |
| W5-11A    | -105.8     | 2199                 | -826                 | 1569                 | -600                 | 2184                 | -840                 |
| W5-12A    | -105.6     | 2242                 | -783                 | 1593                 | -577                 | 2188                 | -837                 |
| W5-13A    | -104.5     | 2640                 | -384                 | 1900                 | -269                 | 2656                 | -368                 |
| W5-14A    | -104.3     | 2049                 | -975                 | 1462                 | -707                 | 2033                 | -992                 |

|        |        |      |       |      |       |      |       |
|--------|--------|------|-------|------|-------|------|-------|
| W5-15A | -103.0 | 1725 | -1300 | 1207 | -963  | 1658 | -1367 |
| W5-16A | -102.8 | 2119 | -906  | 1513 | -656  | 2103 | -921  |
| W5-17A | -102.4 | 2023 | -1001 | 1456 | -713  | 2016 | -1009 |
| W5-18A | -101.9 | 2402 | -623  | 1736 | -434  | 2366 | -658  |
| W5-19A | -101.9 | 2026 | -999  | 1447 | -722  | 2010 | -1015 |
| W5-20A | -101.8 | 2634 | -391  | 1900 | -270  | 2647 | -378  |
| W5-21A | -101.7 | 2091 | -934  | 1499 | -670  | 2075 | -950  |
| W5-22A | -101.3 | 2436 | -589  | 1756 | -413  | 2421 | -604  |
| W5-23A | -100.8 | 2396 | -628  | 1732 | -438  | 2394 | -631  |
| W5-24A | -100.8 | 2162 | -863  | 1549 | -620  | 2146 | -878  |
| W5-25A | -99.9  | 2618 | -406  | 1882 | -287  | 2642 | -383  |
| W5-26A | -99.0  | 2574 | -451  | 1854 | -316  | 2582 | -443  |
| W5-27A | -99.0  | 2163 | -862  | 1546 | -623  | 2149 | -876  |
| W5-28A | -98.6  | 2396 | -629  | 1730 | -439  | 2423 | -601  |
| W5-29A | -98.2  | 2145 | -879  | 1536 | -634  | 2131 | -894  |
| W5-30A | -96.4  | 1487 | -1537 | 1126 | -1043 | 1517 | -1508 |
| W5-31A | -95.6  | 2239 | -785  | 1603 | -566  | 2222 | -802  |
| W5-32A | -95.6  | 2279 | -746  | 1737 | -433  | 2265 | -760  |
| W5-33A | -95.1  | 2279 | -745  | 1616 | -553  | 2266 | -758  |
| W5-34A | -93.6  | 1940 | -1085 | 1395 | -775  | 2030 | -994  |
| W5-35A | -93.5  | 2071 | -954  | 1419 | -750  | 2121 | -904  |
| W5-36A | -93.4  | 2482 | -542  | 1791 | -379  | 2429 | -595  |
| W5-37A | -91.3  | 2357 | -667  | 1713 | -456  | 2396 | -629  |
| W5-38A | -88.4  | 1583 | -1442 | 1179 | -990  | 1606 | -1419 |
| W5-39A | -86.7  | 1723 | -1301 | 1241 | -929  | 1706 | -1319 |
| W5-40A | -86.6  | 2362 | -662  | 1709 | -461  | 2351 | -674  |
| W5-41A | -86.3  | 2466 | -558  | 1776 | -393  | 2449 | -575  |
| W5-42A | -84.0  | 2434 | -591  | 1754 | -416  | 2416 | -608  |

---



**Table S2: ZPE and BSSE corrected stabilization energy (kJ mol<sup>-1</sup>), unscaled vibrational frequencies and their shifts (cm<sup>-1</sup>) for hydrogen bonded H-Br molecule in HBr-(H<sub>2</sub>O)<sub>1-5</sub> clusters, for D-Br molecule in DBr-(H<sub>2</sub>O)<sub>1-5</sub> clusters and for H-Br molecule in HBr-(D<sub>2</sub>O)<sub>1-5</sub> clusters calculated at the MP2/aug-cc-pVDZ level of theory.**

| Structure | $\Delta E$ | $\nu$<br>HBr/H <sub>2</sub> O | $\Delta\nu$<br>HBr/H <sub>2</sub> O | $\nu$<br>DBr/H <sub>2</sub> O | $\Delta\nu$<br>DBr/H <sub>2</sub> O | $\nu$<br>HBr/D <sub>2</sub> O | $\Delta\nu$<br>HBr/D <sub>2</sub> O |
|-----------|------------|-------------------------------|-------------------------------------|-------------------------------|-------------------------------------|-------------------------------|-------------------------------------|
| W1-1B     | -10.5      | 2513                          | -214                                | 1790                          | -150                                | 2512                          | -215                                |
| W2-1B     | -28.7      | 2225                          | -501                                | 1579                          | -362                                | 2221                          | -506                                |
| W2-2B     | -28.7      | 2225                          | -502                                | 1578                          | -362                                | 2220                          | -506                                |
| W2-3B     | -27.9      | 2230                          | -496                                | 1580                          | -361                                | 2226                          | -500                                |
| W3-1B     | -55.4      | 1839                          | -887                                | 1305                          | -636                                | 1825                          | -901                                |
| W3-2B     | -53.9      | 1863                          | -863                                | 1321                          | -619                                | 1850                          | -876                                |
| W3-3B     | -28.9      | 2237                          | -489                                | 1640                          | -301                                | 2117                          | -609                                |
| W4-1B     | -82.5      | 2376                          | -351                                | 1704                          | -237                                | 2344                          | -382                                |
| W4-2B     | -79.0      | 2381                          | -345                                | 1706                          | -235                                | 2347                          | -379                                |
| W4-3B     | -79.0      | 2402                          | -324                                | 1717                          | -223                                | 2438                          | -288                                |
| W4-4B     | -76.5      | 1595                          | -1132                               | 1180                          | -761                                | 1648                          | -1078                               |
| W4-5B     | -76.5      | 1594                          | -1133                               | 1178                          | -763                                | 1646                          | -1080                               |
| W4-6B     | -76.5      | 1593                          | -1133                               | 1178                          | -763                                | 1646                          | -1080                               |
| W4-7B     | -76.2      | 1592                          | -1134                               | 1176                          | -765                                | 1645                          | -1082                               |
| W4-8B     | -76.1      | 1617                          | -1109                               | 1216                          | -725                                | 1699                          | -1027                               |
| W4-9B     | -75.4      | 1596                          | -1130                               | 1181                          | -759                                | 1650                          | -1076                               |
| W4-10B    | -74.0      | 1763                          | -963                                | 1246                          | -695                                | 1742                          | -984                                |
| W4-11B    | -73.1      | 2494                          | -232                                | 1874                          | -67                                 | 2609                          | -118                                |
| W4-12B    | -72.5      | 2255                          | -472                                | 1649                          | -292                                | 2105                          | -622                                |
| W4-13B    | -72.4      | 1268                          | -1458                               | 925                           | -1015                               | 1305                          | -1421                               |
| W4-14B    | -71.4      | 2487                          | -240                                | 1854                          | -87                                 | 2594                          | -13                                 |
| W4-15B    | -70.6      | 1893                          | -834                                | 1345                          | -596                                | 1881                          | -845                                |
| W4-16B    | -69.9      | 1521                          | -1205                               | 1122                          | -819                                | 1539                          | -1187                               |
| W4-17B    | -69.6      | 2516                          | -210                                | 1881                          | -59                                 | 2616                          | -110                                |
| W4-18B    | -67.8      | 2083                          | -643                                | 1480                          | -461                                | 2076                          | -651                                |
| W4-19B    | -67.8      | 2079                          | -647                                | 1477                          | -464                                | 2072                          | -655                                |
| W4-20B    | -67.4      | 2121                          | -605                                | 1505                          | -436                                | 2114                          | -613                                |
| W4-21B    | -66.0      | 2204                          | -522                                | 1565                          | -375                                | 2200                          | -527                                |
| W5-1B     | -113.3     | 2610                          | -116                                | 1957                          | 17                                  | 2697                          | -30                                 |
| W5-2B     | -112.5     | 2580                          | -146                                | 1940                          | -1                                  | 2676                          | -51                                 |
| W5-3B     | -111.6     | 2569                          | -157                                | 1912                          | -29                                 | 2642                          | -84                                 |
| W5-4B     | -105.9     | 1788                          | -939                                | 1277                          | -664                                | 1781                          | -945                                |
| W5-5B     | -105.8     | 2342                          | -384                                | 1674                          | -267                                | 2304                          | -423                                |
| W5-6B     | -104.2     | 2222                          | -504                                | 1578                          | -362                                | 2196                          | -531                                |
| W5-7B     | -103.8     | 2131                          | -595                                | 1512                          | -429                                | 2125                          | -601                                |
| W5-8B     | -103.6     | 1820                          | -907                                | 1297                          | -643                                | 1811                          | -915                                |
| W5-9B     | -103.6     | 1814                          | -912                                | 1293                          | -647                                | 1806                          | -921                                |
| W5-10B    | -102.9     | 2202                          | -525                                | 1559                          | -382                                | 2167                          | -559                                |
| W5-11B    | -102.2     | 2418                          | -308                                | 1796                          | -145                                | 2469                          | -257                                |
| W5-12B    | -102.2     | 2406                          | -320                                | 1728                          | -212                                | 2399                          | -328                                |
| W5-13B    | -101.1     | 2407                          | -319                                | 1725                          | -215                                | 2341                          | -385                                |
| W5-14B    | -100.5     | 1891                          | -835                                | 1343                          | -597                                | 1880                          | -846                                |

|        |        |      |       |      |      |      |       |
|--------|--------|------|-------|------|------|------|-------|
| W5-15B | -100.4 | 1963 | -763  | 1393 | -548 | 1945 | -781  |
| W5-16B | -98.2  | 2405 | -322  | 1736 | -204 | 2390 | -336  |
| W5-17B | -98.1  | 2513 | -213  | 1917 | -24  | 1887 | -840  |
| W5-18B | -98.0  | 1583 | -1143 | 1170 | -771 | 1636 | -1091 |
| W5-19B | -97.6  | 2130 | -596  | 1515 | -426 | 2120 | -606  |
| W5-20B | -96.9  | 1769 | -957  | 1244 | -696 | 1740 | -986  |
| W5-21B | -96.7  | 1566 | -1160 | 1152 | -788 | 1604 | -1122 |
| W5-22B | -96.4  | 2129 | -597  | 1513 | -428 | 2123 | -604  |
| W5-23B | -96.3  | 2387 | -339  | 1702 | -238 | 2374 | -352  |
| W5-24B | -96.2  | 1552 | -1175 | 1120 | -820 | 1555 | -1171 |
| W5-25B | -96.0  | 1784 | -942  | 1266 | -674 | 1767 | -960  |
| W5-26B | -95.4  | 1499 | -1227 | 1095 | -845 | 1525 | -1202 |
| W5-27B | -95.2  | 2426 | -300  | 1845 | -96  | 2540 | -187  |
| W5-28B | -95.2  | 2331 | -396  | 1675 | -266 | 2295 | -432  |
| W5-29B | -95.2  | 2510 | -216  | 1792 | -149 | 2511 | -215  |
| W5-30B | -94.2  | 2163 | -564  | 1539 | -402 | 2118 | -608  |
| W5-31B | -93.5  | 1840 | -886  | 1306 | -635 | 1826 | -900  |
| W5-32B | -92.6  | 1821 | -906  | 1291 | -649 | 1805 | -921  |
| W5-33B | -92.1  | 2483 | -243  | 1834 | -107 | 2537 | -190  |
| W5-34B | -90.6  | 1934 | -792  | 1379 | -561 | 1925 | -801  |
| W5-35B | -90.1  | 1994 | -733  | 1417 | -524 | 1986 | -741  |
| W5-36B | -89.1  | 2273 | -453  | 1596 | -344 | 2265 | -461  |
| W5-37B | -86.7  | 2095 | -631  | 1486 | -455 | 2072 | -654  |
| W5-38B | -82.2  | 2072 | -654  | 1473 | -468 | 2066 | -660  |
| W5-39B | -82.1  | 2209 | -517  | 1569 | -371 | 2204 | -522  |
| W5-40B | -79.7  | 2167 | -560  | 1541 | -400 | 2161 | -565  |
| W5-41B | -68.3  | 2370 | -357  | 1752 | -188 | 2444 | -282  |

---

**Table S3: Bond distances (Å) and electric fields along the H-X bond (MV cm<sup>-1</sup>) at the MP2/aug-cc-pVDZ level of theory for the HCl-(H<sub>2</sub>O)<sub>n</sub> and HBr-(H<sub>2</sub>O)<sub>n</sub> clusters respectively.**

| Structure                               | d(H-Cl) | H-Cl Field | Structure                               | d(H-Br) | H-Br Field |
|-----------------------------------------|---------|------------|-----------------------------------------|---------|------------|
| <b>HCl-H<sub>2</sub>O</b>               |         |            | <b>HBr-H<sub>2</sub>O</b>               |         |            |
| W1-1A                                   | 1.307   | -70.6      | W1-1B                                   | 1.438   | -62.8      |
| <b>HCl-(H<sub>2</sub>O)<sub>2</sub></b> |         |            | <b>HBr-(H<sub>2</sub>O)<sub>2</sub></b> |         |            |
| W2-1A                                   | 1.328   | -108.2     | W2-1B                                   | 1.462   | -98.8      |
| W2-2A                                   | 1.328   | -108.2     | W2-2B                                   | 1.462   | -98.9      |
| W2-3A                                   | 1.328   | -108.5     | W2-3B                                   | 1.4624  | -99.1      |
| <b>HCl-(H<sub>2</sub>O)<sub>3</sub></b> |         |            | <b>HBr-(H<sub>2</sub>O)<sub>3</sub></b> |         |            |
| W3-1A                                   | 1.353   | -146.8     | W3-1B                                   | 1.498   | -138.4     |
| W3-2A                                   | 1.352   | -145.1     | W3-2B                                   | 1.496   | -136.7     |
| W3-3A                                   | 1.386   | -155.6     | W3-3B                                   | 1.956   | -163.4     |
| <b>HCl-(H<sub>2</sub>O)<sub>4</sub></b> |         |            | <b>HBr-(H<sub>2</sub>O)<sub>4</sub></b> |         |            |
| W4-1A                                   | 1.317   | -86.9      | W4-1B                                   | 1.448   | -77.0      |
| W4-2A                                   | 1.362   | -160.7     | W4-2B                                   | 1.448   | -79.3      |
| W4-3A                                   | 1.362   | -160.9     | W4-3B                                   | 1.446   | -75.0      |
| W4-4A                                   | 1.361   | -158.3     | W4-4B                                   | 1.515   | -154.7     |
| W4-5A                                   | 1.318   | -90.0      | W4-5B                                   | 1.515   | -154.8     |
| W4-6A                                   | 1.315   | -85.31     | W4-6B                                   | 1.515   | -154.8     |
| W4-7A                                   | 1.360   | -159.0     | W4-7B                                   | 1.515   | -152.5     |
| W4-8A                                   | 1.360   | -152.6     | W4-8B                                   | 1.510   | -151.4     |
| W4-9A                                   | 1.365   | -160.5     | W4-9B                                   | 1.514   | -148.0     |
| W4-10A                                  | 1.358   | -155.9     | W4-10B                                  | 1.506   | -148.5     |
| W4-11A                                  | 1.377   | -169.6     | W4-11B                                  | 2.010   | -184.7     |
| W4-12A                                  | 1.379   | -167.0     | W4-12B                                  | 1.943   | -182.4     |
| W4-13A                                  | 1.371   | -163.9     | W4-13B                                  | 1.553   | -164.8     |
| W4-14A                                  | 1.349   | -140.8     | W4-14B                                  | 2.003   | -184.1     |
| W4-15A                                  | 1.364   | -155.8     | W4-15B                                  | 1.492   | -133.2     |
| W4-16A                                  | 1.336   | -116.7     | W4-16B                                  | 1.525   | -152.6     |
| W4-17A                                  | 1.336   | -116.5     | W4-17B                                  | 2.017   | -183.9     |
| W4-18A                                  | 1.334   | -114.7     | W4-18B                                  | 1.474   | -108.6     |
| W4-19A                                  | 1.715   | -200.5     | W4-19B                                  | 1.474   | -108.9     |
| W4-20A                                  | 1.790   | -202.2     | W4-20B                                  | 1.471   | -106.4     |
| W4-21A                                  | 1.329   | -109.6     | W4-21B                                  | 1.464   | -100.6     |
| W4-22A                                  | 1.381   | -151.9     |                                         |         |            |
| <b>HCl-(H<sub>2</sub>O)<sub>5</sub></b> |         |            | <b>HBr-(H<sub>2</sub>O)<sub>5</sub></b> |         |            |
| W5-1A                                   | 1.354   | -138.0     | W5-1B                                   | 2.022   | -204.5     |
| W5-2A                                   | 1.830   | -223.9     | W5-2B                                   | 2.018   | -201.8     |
| W5-3A                                   | 1.319   | -89.1      | W5-3B                                   | 2.010   | -200.4     |
| W5-4A                                   | 1.334   | -121.4     | W5-4B                                   | 1.502   | -132.8     |
| W5-5A                                   | 1.352   | -140.7     | W5-5B                                   | 1.451   | -79.6      |
| W5-6A                                   | 1.817   | -219.7     | W5-6B                                   | 1.461   | -94.2      |
| W5-7A                                   | 1.328   | -104.6     | W5-7B                                   | 1.470   | -111.8     |
| W5-8A                                   | 1.420   | -187.8     | W5-8B                                   | 1.499   | -135.2     |
| W5-9A                                   | 1.330   | -108.3     | W5-9B                                   | 1.500   | -135.4     |
| W5-10A                                  | 1.315   | -89.3      | W5-10B                                  | 1.463   | -97.9      |
| W5-11A                                  | 1.350   | -139.0     | W5-11B                                  | 1.980   | -190.7     |
| W5-12A                                  | 1.346   | -132.6     | W5-12B                                  | 1.446   | -79.7      |
| W5-13A                                  | 1.315   | -84.5      | W5-13B                                  | 1.446   | -74.8      |
| W5-14A                                  | 1.362   | -165.1     | W5-14B                                  | 1.493   | -131.0     |

|        |       |        |        |       |        |
|--------|-------|--------|--------|-------|--------|
| W5-15A | 1.395 | -182.9 | W5-15B | 1.485 | -122.7 |
| W5-16A | 1.356 | -151.7 | W5-16B | 1.447 | -83.2  |
| W5-17A | 1.364 | -161.5 | W5-17B | 2.014 | -193.8 |
| W5-18A | 1.333 | -114.2 | W5-18B | 1.516 | -158.7 |
| W5-19A | 1.364 | -161.4 | W5-19B | 1.470 | -105.6 |
| W5-20A | 1.316 | -93.1  | W5-20B | 1.505 | -145.6 |
| W5-21A | 1.357 | -131.2 | W5-21B | 1.518 | -131.1 |
| W5-22A | 1.331 | -113.3 | W5-22B | 1.470 | -112.2 |
| W5-23A | 1.334 | -121.8 | W5-23B | 1.448 | -77.7  |
| W5-24A | 1.352 | -127.6 | W5-24B | 1.524 | -158.0 |
| W5-25A | 1.317 | -87.1  | W5-25B | 1.518 | -122.5 |
| W5-26A | 1.320 | -92.0  | W5-26B | 1.527 | -158.5 |
| W5-27A | 1.352 | -145.6 | W5-27B | 1.999 | -184.5 |
| W5-28A | 1.333 | -117.5 | W5-28B | 1.452 | -82.8  |
| W5-29A | 1.354 | -147.1 | W5-29B | 1.985 | -179.1 |
| W5-30A | 1.410 | -189.2 | W5-30B | 1.466 | -106.8 |
| W5-31A | 1.346 | -136.1 | W5-31B | 1.498 | -137.8 |
| W5-32A | 1.801 | -211.7 | W5-32B | 1.499 | -138.9 |
| W5-33A | 1.343 | -135.8 | W5-33B | 1.991 | -190.4 |
| W5-34A | 1.749 | -196.0 | W5-34B | 1.487 | -128.0 |
| W5-35A | 1.766 | -201.7 | W5-35B | 1.483 | -126.6 |
| W5-36A | 1.327 | -111.8 | W5-36B | 1.458 | -97.3  |
| W5-37A | 1.336 | -122.6 | W5-37B | 1.473 | -113.1 |
| W5-38A | 1.691 | -198.2 | W5-38B | 1.475 | -110.2 |
| W5-39A | 1.392 | -157.7 | W5-39B | 1.463 | -99.6  |
| W5-40A | 1.336 | -117.7 | W5-40B | 1.467 | -104.0 |
| W5-41A | 1.329 | -108.4 | W5-41B | 1.990 | -165.0 |
| W5-42A | 1.331 | -112.2 |        |       |        |

**Cartesian coordinates of various hydrogen bonded HCl-water clusters considered in the present investigation at MP2/aug-cc-pVDZ level of theory.**

**HCl-H<sub>2</sub>O**

\*\*\*\*\*

**W1-1A**

O -1.95574500 0.00002800 -0.09287200  
H -2.35970500 -0.76462500 0.33983700  
H -2.36033000 0.76422600 0.34005600  
Cl 1.20394400 0.00000000 0.00711600  
H -0.10106400 0.00017900 -0.05787900

---

**HCl-(H<sub>2</sub>O)<sub>2</sub>**

\*\*\*\*\*

**W2-1A**

Cl -1.53607400 -0.22192900 0.00190200  
H -0.57606800 0.69455400 -0.03901400  
O 0.91871900 1.53688100 -0.10887900  
H 1.46805600 0.72995600 -0.02576700  
O 1.72239300 -1.12078900 0.09417800  
H 0.79060100 -1.39273000 0.06436500  
H 1.14398000 2.07877500 0.65913200  
H 2.15778300 -1.66650000 -0.57344200

---

**W2-2A**

Cl 1.53617200 -0.22180100 0.00188100  
H 0.57612700 0.69461700 -0.03915200  
O -0.91893300 1.53655000 -0.10888500  
H -1.46761600 0.72925000 -0.02463700  
O -1.72257700 -1.12107100 0.09450100  
H -0.79074300 -1.39295700 0.06525400  
H -1.14418500 2.07910600 0.65866100  
H -2.15643500 -1.66322600 -0.57702500

---

**W2-3A**

Cl 1.53126600 -0.22443100 0.00838100  
H 0.56977400 0.69010300 -0.03173900  
O -0.91792800 1.54923200 -0.09217300  
H -1.48739500 0.75906300 -0.00087600  
O -1.70672800 -1.11605400 -0.05728700  
H -0.78211100 -1.40475200 0.00308700  
H -1.12091800 2.09930300 0.67606800  
H -2.21361800 -1.79382100 0.40666800

---

**HCl-(H<sub>2</sub>O)<sub>3</sub>**

\*\*\*\*\*

**W3-1A**

O 2.32986400 -0.36241300 0.01709300  
H 2.91790200 -0.36333700 0.78266800  
H 1.91993200 0.53121100 0.00948500  
Cl -1.89902600 0.18081800 0.05309200  
H -1.00431900 -0.83346900 0.00636600  
O 0.85600400 1.97042200 -0.01381700  
H -0.05489500 1.62657700 0.03031700  
H 0.85390500 2.56043500 -0.77854900  
O 0.12905400 -1.94224400 -0.01780300  
H 0.13933900 -2.46364700 -0.83178400

H 0.99220300 -1.45780000 -0.00485000

-----  
**W3-2A**

O -0.85972900 1.96854300 0.02885000  
H -0.86852100 2.49354300 0.83984200  
H 0.05194300 1.62890900 -0.02766400  
H 1.00578200 -0.81758800 0.06375600  
O -2.33244500 -0.36491000 -0.06206200  
H -1.91620500 0.52584400 -0.04699700  
H -2.94796800 -0.34353500 -0.80491800  
O -0.12672700 -1.92288300 0.23636200  
H -0.06849600 -2.63149500 -0.41820300  
H -0.99363500 -1.47711500 0.07146500  
Cl 1.89931200 0.18679000 -0.07661700

-----  
**W3-3A**

H 0.01043100 -0.40914100 0.72081600  
O 2.07593500 1.00635300 -0.61764000  
H 3.03892400 1.06395100 -0.57296600  
H 1.88885300 0.06141900 -0.74245900  
O -2.22445400 0.83942600 -0.50231200  
H -1.91734500 -0.04537700 -0.75746200  
H -2.53785500 1.23991000 -1.32314100  
O -0.03493500 1.00311100 1.21806900  
H 0.73676400 1.33894900 0.71839600  
H -0.81401900 1.30032300 0.70482200  
Cl 0.06246400 -1.60830300 0.02747400

-----  
**HCl-(H<sub>2</sub>O)<sub>4</sub>**

\*\*\*\*\*

**W4-1A**

O -1.84431200 1.67523600 -0.34995200  
H -1.69158500 2.05262800 -1.22550600  
H -2.21036800 0.77432300 -0.52103600  
O -2.53117800 -0.93964500 -0.66339600  
H -1.79300300 -1.35956800 -0.16469500  
H -3.33547800 -1.34954500 -0.32266300  
H 1.62162100 0.54157000 0.18274700  
O 0.25602700 1.03388200 1.17800400  
H -0.49767800 1.38788800 0.63495400  
H 0.36761000 1.64350000 1.91821300  
O -0.33712300 -1.73278100 0.79332300  
H -0.08610000 -0.85799400 1.14521500  
H 0.44179800 -1.99996200 0.28467400  
Cl 2.51975700 -0.06625800 -0.56445500

-----  
**W4-2A**

O 1.94790400 -1.69046200 -0.18579000  
H 2.22669800 -0.74496700 -0.16373400  
H 2.23645100 -2.02055300 -1.04549100  
O 2.54757200 0.96284200 0.03276300  
H 1.72094400 1.49401100 0.07484400  
H 3.13514100 1.45971200 -0.54909700  
O 0.17277800 2.34588800 0.17938300  
H -0.59394100 1.77034900 0.00027600  
H -0.04341100 2.76955500 1.02006300  
O -0.65081700 -2.08251600 0.36595400  
H 0.31238000 -1.94116500 0.17131700  
H -0.68863100 -2.36555700 1.28927500

H -1.51922000 -0.83984700 0.06074200  
Cl -2.28975900 0.24308500 -0.23509800

-----  
**W4-3A**

O -1.94848200 -1.69057400 -0.18325300  
H -2.24099400 -2.02297200 -1.04071300  
H -2.22740800 -0.74515200 -0.16236400  
Cl 2.29074800 0.24320100 -0.23450300  
H 1.51927800 -0.83990000 0.05975800  
O -2.54879100 0.96398500 0.03131600  
H -3.13419800 1.46011200 -0.55336000  
H -1.72139500 1.49398800 0.07356200  
O 0.65096200 -2.08170100 0.36351400  
H 0.68973200 -2.36559100 1.28654600  
H -0.31253100 -1.94027600 0.17004500  
H 0.59489100 1.76990500 0.00079500  
O -0.17261000 2.34449300 0.17969100  
H 0.04127000 2.76584200 1.02213400

-----  
**W4-4A**

O 2.52958700 0.92188600 -0.10753800  
H 1.70784100 1.45930400 -0.15940600  
H 2.99055200 1.09049400 -0.93859000  
O 0.16245700 2.33431100 -0.19393600  
H -0.61427900 1.75042200 -0.11640900  
H 0.01499600 3.01438000 0.47583300  
H -1.47347500 -0.82223500 -0.18659900  
O 1.88146300 -1.64989500 0.50323400  
H 2.17040200 -0.72990700 0.29028000  
H 1.98327100 -1.72500700 1.46004300  
O -0.50192800 -1.91062200 -0.70225700  
H 0.36315000 -1.89090900 -0.21556800  
H -0.82794200 -2.81735600 -0.63265600  
Cl -2.28747900 0.18266900 0.23688500

-----  
**W4-5A**

H 0.70397200 -0.96939600 1.18707800  
O 0.22622700 -0.25127400 1.68073100  
H 0.14362900 -0.55567900 2.59348600  
H 1.25638900 -2.70626000 -0.33934100  
O 1.50930400 -1.82191900 -0.04729100  
H 1.29222900 -1.22152600 -0.80426700  
H 1.07828500 1.32715300 0.98794100  
O 1.36049000 1.94849200 0.29048900  
H 2.23426900 2.25525500 0.56264700  
H -1.25040200 -0.07172800 0.70705000  
H -0.12681700 0.20584700 -1.83921000  
O 0.83947400 0.14599600 -1.79813300  
H 1.08606000 0.89408000 -1.21437200  
Cl -2.22950400 0.03952300 -0.16749300

-----  
**W4-6A**

H -0.85222100 -0.92554400 1.18639900  
O -0.27728900 -0.29321200 1.69165000  
H -0.15097800 -0.68234000 2.56639600  
H -2.57136600 -1.93261500 -0.16772100  
O -1.62863400 -1.74043100 -0.09670900  
H -1.43337000 -1.09550900 -0.82188500  
H 1.20368700 -0.22083100 0.67066200  
H -1.72200300 2.62365700 0.66010500

|    |             |             |             |
|----|-------------|-------------|-------------|
| O  | -0.99972100 | 2.07038000  | 0.33930000  |
| H  | -0.83522400 | 1.41844200  | 1.04605300  |
| H  | -0.94662400 | 1.00518400  | -1.18227800 |
| O  | -0.86119800 | 0.24122200  | -1.78933500 |
| H  | 0.09684100  | 0.14972700  | -1.90130500 |
| Cl | 2.19682300  | -0.15081400 | -0.18915700 |

-----  
**W4-7A**

|    |             |             |             |
|----|-------------|-------------|-------------|
| O  | -0.67362600 | 2.11247000  | 0.32897400  |
| H  | -0.74943300 | 2.34217100  | 1.26476400  |
| H  | 0.29602300  | 1.98001000  | 0.16966400  |
| H  | -1.51502400 | 0.84700800  | -0.00099400 |
| O  | 1.92849100  | 1.66121700  | -0.19483600 |
| H  | 2.66342100  | 2.13883100  | 0.20759900  |
| H  | 2.19351500  | 0.71071100  | -0.18124200 |
| O  | 2.53222000  | -0.99325900 | -0.14051900 |
| H  | 1.71581200  | -1.50432100 | 0.05694900  |
| H  | 2.87151000  | -1.38443100 | -0.95526000 |
| O  | 0.17403300  | -2.32490000 | 0.35292200  |
| H  | -0.02930800 | -2.71652200 | 1.21167300  |
| H  | -0.59884700 | -1.76562800 | 0.15086100  |
| Cl | -2.26686000 | -0.25247400 | -0.27625500 |

-----  
**W4-8A**

|    |             |             |             |
|----|-------------|-------------|-------------|
| O  | 0.19670800  | -2.24109100 | 0.36854100  |
| H  | -0.57485900 | -1.72827400 | 0.06627200  |
| H  | -0.00478900 | -2.43999800 | 1.29236500  |
| H  | -1.46971800 | 0.72341800  | 0.22236900  |
| O  | -0.50020000 | 1.66206000  | 0.98868000  |
| H  | 0.32856400  | 1.76935700  | 0.45115600  |
| H  | -0.82595100 | 2.55556700  | 1.15907700  |
| O  | 2.54027500  | -0.84641100 | -0.04336800 |
| H  | 1.73418100  | -1.39295100 | 0.09173000  |
| H  | 3.13469500  | -1.39291200 | -0.57092300 |
| O  | 1.74806100  | 1.72289900  | -0.47948200 |
| H  | 2.11743900  | 0.81312500  | -0.38395400 |
| H  | 1.61799100  | 1.83409500  | -1.42977300 |
| Cl | -2.23154800 | -0.18359300 | -0.44548700 |

-----  
**W4-9A**

|    |             |             |             |
|----|-------------|-------------|-------------|
| O  | 2.34484900  | 1.14357800  | -0.43249100 |
| H  | 1.56356100  | 1.55384200  | -0.00179400 |
| H  | 2.34011200  | 1.49201400  | -1.33286300 |
| O  | 0.06786500  | 2.01403000  | 0.86271000  |
| H  | -0.71534600 | 1.58955400  | 0.46570600  |
| H  | -0.21593000 | 2.91074400  | 1.07931100  |
| H  | -1.42091000 | -0.86012600 | 0.01497500  |
| O  | 1.97986400  | -1.55137300 | -0.23899100 |
| H  | 2.18218600  | -0.58896500 | -0.31704000 |
| H  | 2.77257100  | -1.95391200 | 0.13506700  |
| O  | -0.53121600 | -1.95421100 | 0.63294000  |
| H  | 0.41425400  | -1.84559800 | 0.35194100  |
| H  | -0.52022100 | -1.86580800 | 1.59583000  |
| Cl | -2.19359900 | 0.13835600  | -0.50496900 |

-----  
**W4-10A**

|   |             |            |             |
|---|-------------|------------|-------------|
| O | 0.52841800  | 2.08455600 | -0.23775500 |
| H | -0.38807500 | 1.89028900 | 0.08299800  |
| H | 0.42201500  | 2.33235500 | -1.16621600 |
| O | -1.92372500 | 1.41303800 | 0.67867700  |



|    |             |             |             |
|----|-------------|-------------|-------------|
| H  | -2.25083300 | 0.62280400  | 0.19081900  |
| H  | -2.67306200 | 2.01695100  | 0.74006400  |
| O  | -2.34766600 | -0.87845700 | -0.71463000 |
| H  | -1.63192600 | -1.44926900 | -0.35328900 |
| H  | -3.09792200 | -1.46695100 | -0.85848500 |
| H  | 1.48141500  | 0.85028700  | -0.11458600 |
| O  | -0.21353500 | -2.25174700 | 0.34657500  |
| H  | 0.59089100  | -1.73275700 | 0.16027800  |
| H  | -0.21226500 | -2.33258500 | 1.30952200  |
| Cl | 2.31834300  | -0.21589700 | -0.03376700 |

---

**W4-11A**

|    |             |             |             |
|----|-------------|-------------|-------------|
| O  | -2.53830200 | -0.21790000 | 0.04843000  |
| H  | -3.29302300 | -0.39439900 | -0.52585000 |
| H  | -2.03379000 | 0.51347100  | -0.38479700 |
| Cl | 1.72348100  | -0.76160900 | -0.54783300 |
| H  | 0.62450300  | -1.34198800 | 0.04570400  |
| O  | -0.86603700 | 1.65752800  | -0.99096700 |
| H  | -0.22992900 | 1.17125200  | -1.53582600 |
| H  | -0.32598100 | 1.91895400  | -0.21708600 |
| O  | -0.60466100 | -1.94965600 | 0.67022900  |
| H  | -0.54979800 | -1.94452800 | 1.63606900  |
| H  | -1.38547200 | -1.37354900 | 0.45040500  |
| H  | 1.43236300  | 1.13020800  | 0.86218800  |
| O  | 0.87891900  | 1.85136600  | 1.21004700  |
| H  | 1.50259900  | 2.53723000  | 1.48043400  |

---

**W4-12A**

|    |             |             |             |
|----|-------------|-------------|-------------|
| O  | 0.70352100  | 2.22034500  | 0.29083200  |
| H  | 0.80709100  | 2.59690500  | 1.17408200  |
| H  | 1.29961500  | 1.44621100  | 0.28507100  |
| H  | 0.95926300  | -1.05367800 | -0.35578700 |
| O  | -2.48330000 | -1.02402400 | 0.90555400  |
| H  | -2.56713700 | -0.94910100 | 1.86396600  |
| H  | -2.39898500 | -0.10923100 | 0.57845900  |
| O  | -1.62664100 | 1.18097400  | -0.67576700 |
| H  | -0.84836000 | 1.67240000  | -0.32201500 |
| H  | -2.08050200 | 1.79985500  | -1.26089800 |
| O  | -0.39371400 | -1.38474300 | -0.92530200 |
| H  | -0.76924400 | -0.52702700 | -1.20498200 |
| H  | -1.00156900 | -1.62273300 | -0.19531500 |
| Cl | 2.17652300  | -0.65847100 | 0.15734600  |

---

**W4-13A**

|    |             |             |             |
|----|-------------|-------------|-------------|
| H  | 1.61501000  | 0.58749700  | -0.23518500 |
| O  | 0.92844100  | 1.94651900  | -0.24325300 |
| H  | 0.03646200  | 1.81266200  | 0.18186700  |
| H  | 1.37705700  | 2.62020600  | 0.28545400  |
| O  | -2.58343800 | -0.43401900 | -1.06299200 |
| H  | -2.37344500 | -0.53370900 | -2.00002900 |
| H  | -1.98898700 | -1.05482700 | -0.60238800 |
| O  | -0.78474500 | -1.54566100 | 0.85739900  |
| H  | 0.14907900  | -1.46391400 | 0.58379700  |
| H  | -0.81922900 | -2.35382800 | 1.38491300  |
| O  | -1.44605600 | 1.33606900  | 0.82046100  |
| H  | -1.27396500 | 0.50523000  | 1.29423900  |
| H  | -1.98620100 | 1.01507800  | 0.07066100  |
| Cl | 2.13827100  | -0.67986300 | -0.23154400 |

---

**W4-14A**

|    |             |             |             |
|----|-------------|-------------|-------------|
| H  | 0.45949100  | 1.58967700  | -0.47189300 |
| O  | -0.10392200 | 2.35236600  | -0.19003500 |
| H  | -0.15588800 | 2.92468200  | -0.96565600 |
| H  | 3.82564900  | 0.03875400  | 1.34983400  |
| O  | 3.60991200  | -0.52078200 | 0.59220300  |
| H  | 4.43251600  | -0.57589100 | 0.08833400  |
| H  | -1.56249200 | 1.59394400  | 0.32107600  |
| O  | -2.33036300 | 1.02011500  | 0.57284400  |
| H  | -2.46138600 | 1.17026500  | 1.51859700  |
| H  | -1.89210700 | -0.48420700 | 0.23017400  |
| H  | 0.60185000  | -0.61003500 | -0.73338100 |
| O  | 1.24483400  | 0.10396400  | -0.87879700 |
| H  | 2.03012900  | -0.15215900 | -0.36092600 |
| Cl | -1.44949700 | -1.71413700 | -0.10269900 |

---

**W4-15A**

|    |             |             |             |
|----|-------------|-------------|-------------|
| H  | -0.35445600 | 1.14522500  | 0.73621600  |
| O  | 0.37013600  | 1.80454400  | 0.53912000  |
| H  | 0.59062600  | 2.20747400  | 1.38988600  |
| H  | -3.42321800 | 0.57262600  | -1.65697300 |
| O  | -3.64951600 | 0.11070600  | -0.83862600 |
| H  | -4.45498800 | 0.54621000  | -0.53020300 |
| H  | 1.54102500  | 0.96894100  | -0.03069700 |
| H  | 0.68643200  | -2.78766100 | 0.88490200  |
| O  | 0.31152000  | -2.16177100 | 0.25225900  |
| H  | 1.07350700  | -1.63206800 | -0.04478400 |
| H  | -0.94504800 | -0.91595700 | 0.75745200  |
| O  | -1.43513000 | -0.09449400 | 0.96716900  |
| H  | -2.20156000 | -0.08546100 | 0.36543500  |
| Cl | 2.51244700  | 0.15934100  | -0.54297700 |

---

**W4-16A**

|    |             |             |             |
|----|-------------|-------------|-------------|
| O  | 2.51179700  | 0.24507200  | 1.45602800  |
| H  | 2.95455200  | -0.07725600 | 0.64599000  |
| H  | 2.65424700  | -0.44586000 | 2.11508300  |
| H  | -0.94704400 | -0.67715100 | -0.01517700 |
| O  | 0.33069900  | 0.38054800  | -0.21025900 |
| H  | -0.21445200 | 1.19241100  | -0.20371900 |
| H  | 0.93119200  | 0.43314400  | 0.56668500  |
| O  | -1.88467800 | 2.06704900  | -0.11822000 |
| H  | -2.32597100 | 2.63938400  | -0.75856700 |
| H  | -2.44787000 | 1.27783500  | -0.06136800 |
| O  | 2.84208900  | -0.47594000 | -1.22270500 |
| H  | 1.92676400  | -0.14487600 | -1.28144100 |
| H  | 3.30085800  | -0.09518600 | -1.98129100 |
| Cl | -2.13126700 | -1.28448700 | 0.10206100  |

---

**W4-17A**

|   |             |             |             |
|---|-------------|-------------|-------------|
| O | -2.51279500 | 0.24635800  | 1.45546100  |
| H | -2.65638600 | -0.44402300 | 2.11481200  |
| H | -2.95324500 | -0.07715800 | 0.64459800  |
| O | -2.83912100 | -0.47718200 | -1.22359700 |
| H | -3.29874900 | -0.09113100 | -1.97900400 |
| H | -1.92419900 | -0.14448800 | -1.28043600 |
| O | -0.33096500 | 0.38353700  | -0.21084800 |
| H | 0.21574300  | 1.19435800  | -0.20456000 |
| H | -0.93055700 | 0.43698200  | 0.56661400  |
| O | 1.88728500  | 2.06575100  | -0.11839300 |
| H | 2.44930800  | 1.27569800  | -0.06171600 |
| H | 2.33068900  | 2.63873600  | -0.75668700 |

|    |            |             |             |
|----|------------|-------------|-------------|
| H  | 0.94548600 | -0.67693500 | -0.01478000 |
| Cl | 2.12862800 | -1.28586800 | 0.10295100  |

---

**W4-18A**

|    |             |             |             |
|----|-------------|-------------|-------------|
| H  | -2.24201900 | 2.77372900  | 0.27442300  |
| O  | -1.83570700 | 2.07752200  | -0.25713300 |
| H  | -2.42058800 | 1.30974300  | -0.14893200 |
| H  | -0.98336400 | -0.68525100 | 0.05640400  |
| H  | 2.89726800  | -1.07809900 | -1.86224400 |
| O  | 2.82476500  | -0.28462700 | -1.31742900 |
| H  | 1.86891800  | -0.09378500 | -1.27231100 |
| H  | 2.98439400  | -0.17022200 | 0.57568200  |
| O  | 2.57436200  | -0.00439300 | 1.44854600  |
| H  | 3.17689200  | 0.59608000  | 1.90404400  |
| H  | -0.18455700 | 1.17470900  | -0.08727800 |
| O  | 0.33333400  | 0.34557200  | -0.10649500 |
| H  | 0.95780300  | 0.37727800  | 0.65038000  |
| Cl | -2.18992800 | -1.25157500 | 0.10411300  |

---

**W4-19A**

|    |             |             |             |
|----|-------------|-------------|-------------|
| H  | 0.42684100  | 0.00199700  | 1.35586600  |
| O  | -0.50117100 | 0.00121900  | 1.71897900  |
| H  | -0.40490600 | 0.00258100  | 2.68030100  |
| H  | 0.68252300  | 0.00030700  | -1.09890200 |
| H  | -1.16596300 | 1.41543500  | 0.67940800  |
| O  | -1.41098700 | 1.85805100  | -0.16128900 |
| H  | -0.98081400 | 2.72309200  | -0.12363600 |
| H  | -0.96913000 | -2.72510900 | -0.11963100 |
| O  | -1.40433600 | -1.86263300 | -0.15861500 |
| H  | -1.16183700 | -1.41747900 | 0.68142800  |
| H  | -0.73897000 | -0.79421800 | -1.22622000 |
| O  | -0.27064600 | -0.00141500 | -1.63324900 |
| H  | -0.74133700 | 0.79048700  | -1.22739100 |
| Cl | 1.98533600  | 0.00241900  | 0.01601000  |

---

**W4-20A**

|    |             |             |             |
|----|-------------|-------------|-------------|
| H  | -0.52803400 | 0.25315200  | -0.95802900 |
| H  | -1.89384800 | 0.16325400  | 0.89859000  |
| O  | -1.94920800 | 1.12241600  | 1.10479600  |
| H  | -2.89456100 | 1.31967100  | 1.13743700  |
| H  | 1.06324900  | -1.45164800 | 0.36407300  |
| O  | 1.95954400  | -1.20770000 | 0.69293500  |
| H  | 1.96021200  | -1.47885800 | 1.61993400  |
| H  | 2.78081400  | 1.47258100  | -0.68747000 |
| O  | 2.04366900  | 1.34266500  | -0.07697800 |
| H  | 2.13573300  | 0.41298300  | 0.26714100  |
| H  | 0.61623200  | 1.40114500  | -0.64356100 |
| O  | -0.35486900 | 1.30130700  | -0.95849600 |
| H  | -0.95425200 | 1.55177900  | -0.19579000 |
| Cl | -0.93403700 | -1.41844500 | -0.46472900 |

---

**W4-21A**

|   |             |             |             |
|---|-------------|-------------|-------------|
| H | 2.40701200  | 0.37154300  | -0.01783000 |
| H | 1.72720700  | 2.39534500  | -0.90905700 |
| O | 1.61870700  | 1.88591800  | -0.09513100 |
| H | 0.71874500  | 1.49726000  | -0.14726100 |
| H | -3.40927900 | 0.00679400  | -2.02784200 |
| O | -3.06379800 | -0.47883700 | -1.26898000 |
| H | -2.10909200 | -0.27941700 | -1.24602400 |
| H | -3.23212000 | -0.14423600 | 0.61230300  |

|    |             |             |             |
|----|-------------|-------------|-------------|
| O  | -2.78057200 | 0.09003600  | 1.44695400  |
| H  | -3.12157600 | -0.52609700 | 2.10682900  |
| H  | 0.12859600  | -0.60027600 | 0.02770000  |
| O  | -0.51549500 | 0.11160800  | -0.11611600 |
| H  | -1.13298400 | 0.06704800  | 0.64685300  |
| Cl | 2.70310300  | -0.92104500 | 0.07179400  |

-----  
**W4-22A**

|    |             |             |             |
|----|-------------|-------------|-------------|
| H  | 3.52096000  | 0.00181900  | -0.14890900 |
| O  | 2.70540000  | 0.00146900  | -0.66945900 |
| H  | 3.00763800  | 0.00292400  | -1.58822400 |
| H  | 1.37308200  | -1.40795000 | -0.11467800 |
| O  | 0.67862000  | -1.94726500 | 0.30045800  |
| H  | -0.04012500 | -1.93165300 | -0.35072700 |
| H  | -1.51893100 | -0.00105600 | 0.45195400  |
| H  | -0.17939400 | -0.76815600 | 1.53955900  |
| O  | -0.75299700 | -0.00231700 | 1.75830700  |
| H  | -0.18045700 | 0.76487100  | 1.54159600  |
| H  | 1.37108100  | 1.40859000  | -0.11249500 |
| O  | 0.67640500  | 1.94694800  | 0.30350400  |
| H  | -0.04299300 | 1.93053700  | -0.34696500 |
| Cl | -1.98648800 | 0.00055300  | -0.84785800 |

-----  
**HCl-(H<sub>2</sub>O)<sub>5</sub>**

\*\*\*\*\*

**W5-1A**

|    |             |             |             |
|----|-------------|-------------|-------------|
| O  | 0.37811200  | -0.42622000 | 1.56236300  |
| H  | -0.11537100 | -1.05759700 | 1.00173700  |
| H  | -0.09388000 | 0.41492000  | 1.40789000  |
| O  | 0.13521900  | 0.52489100  | -1.74295100 |
| H  | -0.23773200 | -0.35878500 | -1.56171700 |
| H  | 1.07728900  | 0.42312500  | -1.52359600 |
| O  | -1.17776500 | -1.69671100 | -0.47384200 |
| H  | -2.04674500 | -1.27770900 | -0.26939600 |
| H  | -1.37269800 | -2.60477900 | -0.73611300 |
| O  | -1.08869100 | 1.72581400  | 0.32506100  |
| H  | -1.04556800 | 2.68999300  | 0.34039000  |
| H  | -0.61204900 | 1.44430600  | -0.50094000 |
| O  | -3.23197300 | -0.03674600 | 0.16970500  |
| H  | -2.63681600 | 0.73236700  | 0.29824200  |
| H  | -3.74975300 | -0.09498100 | 0.98241300  |
| H  | 1.77290000  | -0.23855400 | 0.81666200  |
| Cl | 2.87889400  | -0.04709000 | 0.06010200  |

-----  
**W5-2A**

|   |             |             |             |
|---|-------------|-------------|-------------|
| O | -2.42846000 | 1.33381700  | -0.09970900 |
| O | -1.94592500 | -0.99414900 | -1.31557200 |
| O | -0.21378500 | 1.16318000  | 1.21172300  |
| O | 1.68877500  | 1.99731200  | -0.30285100 |
| O | 2.56483400  | -0.45972200 | -0.88904200 |
| H | -3.26174600 | 1.36360000  | 0.38748700  |
| H | -2.42931700 | 0.46917900  | -0.58790200 |
| H | -1.25503600 | -1.35898900 | -0.71441700 |
| H | -2.50938300 | -1.74669700 | -1.53422000 |
| H | -0.04074600 | 0.13498100  | 1.17074900  |
| H | 0.50762200  | 1.57357400  | 0.61529700  |
| H | -1.10994200 | 1.28987000  | 0.74672800  |
| H | 1.46421400  | 2.44747400  | -1.12774400 |
| H | 2.11567200  | 1.14158600  | -0.57680900 |

|    |            |             |             |
|----|------------|-------------|-------------|
| H  | 1.87766600 | -0.98376500 | -0.41555000 |
| H  | 3.40260200 | -0.80097400 | -0.55033400 |
| Cl | 0.23028700 | -1.63843100 | 0.80884200  |

---

**W5-3A**

|    |             |             |             |
|----|-------------|-------------|-------------|
| O  | 0.92555500  | -2.29638400 | -0.00731200 |
| H  | 0.61357500  | -2.61682100 | -0.86297900 |
| H  | 1.74006600  | -1.77385800 | -0.21026200 |
| H  | -2.16221000 | -0.41426200 | 0.19690800  |
| O  | -0.86076400 | -0.81887500 | 1.29303000  |
| H  | -1.05461900 | -1.23589200 | 2.14213000  |
| H  | -0.19607400 | -1.40866000 | 0.84143500  |
| O  | 3.10842700  | -0.74273500 | -0.42303700 |
| H  | 2.88282000  | 0.21783100  | -0.39317000 |
| H  | 3.70161100  | -0.83857900 | -1.17771300 |
| O  | 2.34714700  | 1.87088200  | -0.30126800 |
| H  | 1.41653700  | 1.92127500  | 0.01972100  |
| H  | 2.83540900  | 2.47419200  | 0.27236000  |
| O  | -0.21216300 | 1.86786000  | 0.66831900  |
| H  | -0.40511800 | 0.97804400  | 1.02228900  |
| H  | -0.95039000 | 2.03395400  | 0.06515200  |
| Cl | -2.99336600 | 0.09510600  | -0.69139600 |

---

**W5-4A**

|    |             |             |             |
|----|-------------|-------------|-------------|
| O  | 0.83374300  | 1.56804400  | 0.85125200  |
| H  | 1.63917700  | 1.41084300  | 0.29288500  |
| H  | 1.12582000  | 2.13769200  | 1.57401400  |
| O  | 0.26833800  | -1.25672100 | 1.08783400  |
| H  | 0.35534800  | -0.28983900 | 1.17941800  |
| H  | -0.63166800 | -1.37919100 | 0.74487200  |
| H  | -2.31586500 | 0.41436400  | -0.31222200 |
| O  | -1.65252400 | 1.94013400  | -0.27428100 |
| H  | -0.73069500 | 1.90272100  | 0.06576200  |
| H  | -1.59196200 | 2.36766700  | -1.13858000 |
| O  | 2.97115100  | 0.87139900  | -0.61290500 |
| H  | 2.89710500  | -0.11506700 | -0.61704700 |
| H  | 3.08920600  | 1.11967000  | -1.53792200 |
| O  | 2.44164900  | -1.77782600 | -0.46835400 |
| H  | 1.62537500  | -1.72922300 | 0.08497500  |
| H  | 3.00821700  | -2.42209000 | -0.02672400 |
| Cl | -2.78640600 | -0.83398800 | -0.29281100 |

---

**W5-5A**

|    |             |             |             |
|----|-------------|-------------|-------------|
| O  | -1.84409700 | 0.23338400  | 1.39938000  |
| H  | -1.23094000 | -0.54997300 | 1.48105300  |
| H  | -2.42172600 | 0.20417400  | 2.17169400  |
| O  | -0.04536000 | 2.00991900  | 0.15640600  |
| H  | -0.54058400 | 1.90070800  | -0.67334100 |
| H  | -0.63634900 | 1.57345700  | 0.80334800  |
| H  | 1.28437000  | 1.13443100  | 0.06377300  |
| O  | -2.02449500 | 0.46558100  | -1.35311700 |
| H  | -2.26470000 | 0.32617900  | -0.41303500 |
| H  | -2.85777400 | 0.47048700  | -1.84051600 |
| O  | -0.09469300 | -1.76475700 | 1.29210400  |
| H  | -0.06954000 | -1.86226000 | 0.31088300  |
| H  | 0.79546500  | -1.44164100 | 1.49641600  |
| O  | -0.04770400 | -1.61647100 | -1.47318900 |
| H  | 0.79740300  | -1.14901100 | -1.56086500 |
| H  | -0.71819400 | -0.92195300 | -1.61927400 |
| Cl | 2.37137400  | 0.33495000  | -0.02310600 |

---

**W5-6A**

|    |             |             |             |
|----|-------------|-------------|-------------|
| H  | -0.14421700 | -0.03679000 | 1.41147900  |
| O  | -0.72597800 | -1.37502500 | -1.59893200 |
| H  | -0.12037900 | -0.83319400 | -2.12716100 |
| H  | -0.17211700 | -1.61797300 | -0.82407800 |
| O  | -2.57094300 | 0.03660800  | -0.28564600 |
| H  | -1.98933600 | -0.52746800 | -0.86538100 |
| H  | -3.34879000 | -0.49870100 | -0.08357300 |
| O  | 1.76242700  | 0.51249700  | -1.29506100 |
| H  | 1.70426100  | -0.14059500 | -0.55321800 |
| H  | 2.70040500  | 0.53636900  | -1.52669100 |
| O  | -0.82683500 | 0.75781900  | 1.45822100  |
| H  | -0.36781000 | 1.51286600  | 0.96005300  |
| H  | -1.59746600 | 0.46669000  | 0.85734300  |
| O  | 0.47474300  | 2.49945000  | 0.03917800  |
| H  | -0.00289100 | 3.08633600  | -0.56120600 |
| H  | 1.01493200  | 1.90503300  | -0.53781400 |
| Cl | 1.02447600  | -1.37078700 | 1.01812800  |

---

**W5-7A**

|    |             |             |             |
|----|-------------|-------------|-------------|
| O  | -0.00178600 | 2.03844600  | 1.18293000  |
| H  | 0.75931500  | 2.23269200  | 0.61750900  |
| H  | 0.21558900  | 1.16057200  | 1.55051700  |
| O  | -1.26631300 | -2.13889600 | 0.67106700  |
| H  | -2.16997900 | -2.04809400 | 0.99928800  |
| H  | -1.28327900 | -1.72982400 | -0.23245700 |
| O  | -1.14036600 | -0.78988400 | -1.67428700 |
| H  | -1.51194000 | 0.07282500  | -1.38672300 |
| H  | -0.21066300 | -0.59652800 | -1.86573400 |
| O  | -2.17194900 | 1.44277900  | -0.42802100 |
| H  | -2.62269600 | 2.22817900  | -0.75993800 |
| H  | -1.45228200 | 1.77581400  | 0.15363800  |
| H  | 1.59319000  | -0.36860000 | 0.26831800  |
| O  | 0.69512500  | -0.68677500 | 1.68275600  |
| H  | -0.06474800 | -1.27738000 | 1.41075800  |
| H  | 1.15551200  | -1.15233900 | 2.39316200  |
| Cl | 2.15731100  | 0.04572500  | -0.86023000 |

---

**W5-8A**

|    |             |             |             |
|----|-------------|-------------|-------------|
| O  | -0.73814800 | 1.63463300  | 0.89460800  |
| H  | 0.05688100  | 1.90882200  | 0.37019000  |
| H  | -0.78713700 | 2.25512000  | 1.63297500  |
| O  | -0.00672900 | -1.10055100 | 1.09270300  |
| H  | -0.29475400 | -0.17053800 | 1.20071900  |
| H  | -0.71547600 | -1.50884100 | 0.53466000  |
| O  | -2.07491600 | -1.90679600 | -0.47949200 |
| H  | -2.52873400 | -1.04092400 | -0.57513400 |
| H  | -2.74795700 | -2.51133700 | -0.14288500 |
| O  | -2.97906000 | 0.70441600  | -0.50861600 |
| H  | -2.24061800 | 1.17114200  | -0.06652800 |
| H  | -3.16098300 | 1.21458500  | -1.30727900 |
| O  | 1.51292200  | 2.11147900  | -0.50318900 |
| H  | 1.96169500  | 1.24015500  | -0.48162800 |
| H  | 1.51504100  | 2.35888900  | -1.43678600 |
| H  | 1.22137600  | -1.05157700 | 0.41675200  |
| Cl | 2.47106600  | -0.90652600 | -0.24195100 |

---

**W5-9A**

|   |            |            |             |
|---|------------|------------|-------------|
| O | 0.56389100 | 0.90876900 | -1.62617000 |
|---|------------|------------|-------------|

|    |             |             |             |
|----|-------------|-------------|-------------|
| H  | -0.25625700 | 0.34122300  | -1.74257300 |
| H  | 0.86328900  | 1.14703600  | -2.51303900 |
| O  | -0.12146900 | 2.12908800  | 0.84604200  |
| H  | 0.64118100  | 1.85208400  | 1.37354400  |
| H  | 0.15778000  | 1.93795600  | -0.07000700 |
| O  | -2.22145600 | 0.36969300  | 1.05550900  |
| H  | -1.53252900 | 1.07371200  | 1.09022300  |
| H  | -2.92732700 | 0.67002200  | 1.64093900  |
| H  | 1.61305300  | 0.08482300  | -0.58460600 |
| O  | -1.58948500 | -0.60881800 | -1.61997000 |
| H  | -1.27667000 | -1.34246800 | -1.04629300 |
| H  | -2.17885400 | -0.13990900 | -1.00363500 |
| O  | -0.77341600 | -2.08956600 | 0.60342400  |
| H  | -1.23156700 | -1.36172600 | 1.06330000  |
| H  | 0.16571700  | -1.92055000 | 0.77329800  |
| Cl | 2.29986300  | -0.47150200 | 0.40871600  |

---

**W5-10A**

|    |             |             |             |
|----|-------------|-------------|-------------|
| O  | 0.50196500  | 1.69273000  | -1.18732800 |
| H  | 1.40760600  | 1.92087700  | -0.93649000 |
| H  | 0.45565800  | 0.72594200  | -1.04028800 |
| O  | 0.17698000  | -0.94568000 | -0.26801100 |
| H  | -0.45542600 | -0.69388500 | 0.43708900  |
| H  | -0.32026600 | -1.63380700 | -0.74465600 |
| O  | -2.06684300 | -0.13530000 | 1.18670200  |
| H  | -2.23092900 | -0.11975100 | 2.13774200  |
| H  | -2.05631700 | 0.81317100  | 0.90266100  |
| H  | 1.88791800  | -0.81478500 | 0.13818300  |
| O  | -2.25977500 | -2.30614200 | -0.66646300 |
| H  | -2.54545900 | -1.59285400 | -0.06780800 |
| H  | -3.01737000 | -2.48476000 | -1.23610300 |
| O  | -1.70493000 | 2.37557400  | 0.26805900  |
| H  | -0.88590000 | 2.26804000  | -0.27169500 |
| H  | -2.31945700 | 2.85689100  | -0.29923000 |
| Cl | 3.11181000  | -0.39379600 | 0.37158400  |

---

**W5-11A**

|    |             |             |             |
|----|-------------|-------------|-------------|
| O  | 0.93985600  | -0.04137500 | 1.83853500  |
| H  | 0.25147500  | -0.66978600 | 1.56844300  |
| H  | 0.66325400  | 0.78825800  | 1.40633400  |
| O  | 1.02854600  | 0.24372800  | -1.75558900 |
| H  | 0.37659000  | -0.47320700 | -1.72334400 |
| H  | 1.80444600  | -0.12239800 | -1.27510400 |
| H  | -1.97557200 | -0.40903400 | -0.03531300 |
| O  | 0.08931500  | 2.03290300  | -0.01367700 |
| H  | 0.41910000  | 2.92443300  | -0.18180000 |
| H  | 0.46883400  | 1.46036700  | -0.73811700 |
| O  | -2.46891100 | 1.10961700  | 0.06023800  |
| H  | -1.62428100 | 1.61911200  | 0.07062500  |
| H  | -2.91700900 | 1.32658500  | 0.88912800  |
| O  | 2.99143100  | -0.47156100 | 0.03122500  |
| H  | 2.38767100  | -0.43371600 | 0.80621400  |
| H  | 3.56782200  | -1.23022400 | 0.18028600  |
| Cl | -1.41554200 | -1.63334600 | -0.13254200 |

---

**W5-12A**

|   |             |             |             |
|---|-------------|-------------|-------------|
| O | -1.20636300 | -0.55295400 | -1.67600600 |
| H | -0.70827500 | -1.15087400 | -1.09071900 |
| H | -0.70208000 | 0.27559800  | -1.61194800 |
| O | -1.12115000 | 0.47419500  | 1.63681300  |

|    |             |             |             |
|----|-------------|-------------|-------------|
| H  | -0.73414300 | -0.41565700 | 1.56593500  |
| H  | -2.01220600 | 0.36874000  | 1.23904100  |
| O  | 0.28922000  | -1.85038400 | 0.51544100  |
| H  | 1.19842100  | -1.51670300 | 0.40369800  |
| H  | 0.39442100  | -2.78531100 | 0.73482000  |
| O  | 0.29487400  | 1.61633900  | -0.28890900 |
| H  | 0.32795900  | 2.58055700  | -0.23084600 |
| H  | -0.25680000 | 1.30688800  | 0.48940800  |
| H  | 1.72256900  | 0.86991100  | -0.18440300 |
| O  | -3.29500700 | 0.22200600  | -0.04909300 |
| H  | -2.70381200 | -0.13314100 | -0.75083100 |
| H  | -4.12187200 | -0.26829300 | -0.12403500 |
| Cl | 2.81783600  | 0.09380400  | -0.09094600 |

---

**W5-13A**

|    |             |             |             |
|----|-------------|-------------|-------------|
| O  | 2.15683800  | 0.54231000  | -1.24365800 |
| H  | 2.84686700  | 0.10716900  | -0.71197500 |
| H  | 1.45477600  | -0.13277000 | -1.22330900 |
| O  | 0.32961900  | -1.42559400 | -0.14675200 |
| H  | -0.06764400 | -0.76195700 | 0.45456200  |
| H  | -0.43115100 | -1.90614500 | -0.50064700 |
| O  | -0.79060300 | 0.75114000  | 1.22933300  |
| H  | -0.81329700 | 0.91066500  | 2.18149800  |
| H  | -0.25180300 | 1.49271400  | 0.83925200  |
| O  | 3.06049800  | -1.45167300 | 0.61264900  |
| H  | 2.15731900  | -1.77570800 | 0.44237300  |
| H  | 3.60512800  | -2.24400400 | 0.69059500  |
| H  | -2.23082300 | 0.17583800  | 0.36738400  |
| O  | 0.84130100  | 2.50369100  | 0.07731800  |
| H  | 1.40669600  | 1.88232100  | -0.44782300 |
| H  | 0.55926800  | 3.18489100  | -0.54539100 |
| Cl | -3.11862200 | -0.48776500 | -0.33986100 |

---

**W5-14A**

|    |             |             |             |
|----|-------------|-------------|-------------|
| O  | -1.13786600 | 2.56086400  | -0.12335200 |
| H  | -1.33251300 | 3.03427800  | -0.94134100 |
| H  | -1.81598900 | 1.84469300  | -0.07614600 |
| O  | 1.45406700  | 2.12416000  | 0.36820800  |
| H  | 1.57433400  | 2.38494000  | 1.29068600  |
| H  | 0.48602500  | 2.24513500  | 0.18277500  |
| H  | 2.06785600  | 0.75585000  | 0.01978700  |
| O  | 0.32155600  | -2.57652600 | 0.37925200  |
| H  | 0.58107700  | -2.90653300 | 1.24853600  |
| H  | 1.00830200  | -1.92240700 | 0.15367700  |
| O  | -3.03715100 | 0.63333300  | -0.01011400 |
| H  | -3.66497000 | 0.66147800  | 0.72188400  |
| H  | -2.77116000 | -0.31350400 | -0.07837900 |
| O  | -2.30873500 | -1.98636700 | -0.15972900 |
| H  | -2.50627700 | -2.47841500 | -0.96591600 |
| H  | -1.36810200 | -2.19288900 | 0.03547000  |
| Cl | 2.67096800  | -0.42096100 | -0.30736200 |

---

**W5-15A**

|   |             |             |             |
|---|-------------|-------------|-------------|
| H | -1.38292600 | -1.22485800 | -0.07514300 |
| O | 0.16555800  | 1.55640000  | 1.15299400  |
| H | 0.09160300  | 0.61860000  | 1.38900600  |
| H | 1.03507900  | 1.61546400  | 0.69758100  |
| O | 2.55673800  | 1.51936100  | -0.24827800 |
| H | 2.60157100  | 0.58248100  | -0.53285200 |
| H | 3.39037300  | 1.67846500  | 0.21161600  |



|    |             |             |             |
|----|-------------|-------------|-------------|
| O  | 2.37016600  | -1.19152900 | -0.83986200 |
| H  | 1.53494400  | -1.49095300 | -0.43771700 |
| H  | 2.40111900  | -1.62707500 | -1.70062600 |
| O  | -2.39907300 | -0.57048300 | -0.88896700 |
| H  | -2.31034800 | 0.41751200  | -0.75180900 |
| H  | -2.26620500 | -0.71540300 | -1.83610300 |
| O  | -1.94843500 | 1.98686000  | -0.43543800 |
| H  | -1.15845800 | 1.93657800  | 0.16510800  |
| H  | -2.58277100 | 2.55550100  | 0.01792500  |
| Cl | -0.43021300 | -1.80889300 | 0.76055300  |

---

**W5-16A**

|    |             |             |             |
|----|-------------|-------------|-------------|
| O  | -0.45046100 | -1.87283100 | -0.19516200 |
| H  | -0.81785100 | -1.44714000 | -0.98665100 |
| H  | 0.49546200  | -1.64178900 | -0.20223900 |
| O  | -2.54941000 | -0.08752400 | -1.31942400 |
| H  | -2.84779600 | -0.30001000 | -0.41538400 |
| H  | -3.33501800 | -0.16183000 | -1.87536400 |
| O  | -2.11032600 | -0.50839700 | 1.41133500  |
| H  | -2.37429100 | -0.89420700 | 2.25495900  |
| H  | -1.43355700 | -1.11831100 | 1.02479400  |
| H  | 2.18163200  | 0.49929000  | -0.07056200 |
| O  | 1.59201100  | 1.94644200  | -0.17192800 |
| H  | 0.61880400  | 1.95431300  | 0.02375500  |
| H  | 1.98669100  | 2.58509300  | 0.43626900  |
| O  | -1.06185100 | 1.88039600  | 0.25823100  |
| H  | -1.35286800 | 1.20607400  | 0.90043500  |
| H  | -1.51748700 | 1.59326900  | -0.55083300 |
| Cl | 2.64921000  | -0.77290800 | -0.02374100 |

---

**W5-17A**

|    |             |             |             |
|----|-------------|-------------|-------------|
| O  | 1.31296400  | 1.84812800  | -0.14070000 |
| H  | 1.48523000  | 1.35279800  | -0.95625200 |
| H  | 0.35208900  | 2.04890000  | -0.16162400 |
| O  | 2.34527300  | -0.72431300 | -1.31510000 |
| H  | 2.69184600  | -0.68266400 | -0.40410900 |
| H  | 3.06569400  | -1.08049200 | -1.84992300 |
| O  | 2.07305100  | -0.17985600 | 1.41044500  |
| H  | 2.43824000  | 0.01665200  | 2.28120200  |
| H  | 1.78194200  | 0.68747100  | 1.02349400  |
| O  | -1.41910000 | 2.26807800  | -0.02406300 |
| H  | -1.87539000 | 1.40640300  | -0.02277000 |
| H  | -1.93043800 | 2.81424000  | -0.63414500 |
| H  | -1.29403200 | -1.26718800 | 0.07176500  |
| O  | 0.13766100  | -1.81706400 | 0.20362400  |
| H  | 0.66727800  | -1.33307000 | 0.87010300  |
| H  | 0.66393700  | -1.68401200 | -0.60550200 |
| Cl | -2.56736400 | -0.79051900 | -0.04034700 |

---

**W5-18A**

|   |             |             |             |
|---|-------------|-------------|-------------|
| O | -1.78539500 | -1.44480600 | 1.30520800  |
| H | -1.78948100 | -1.50423500 | 2.26818200  |
| H | -1.00360300 | -0.89499100 | 1.08280000  |
| O | 0.15324200  | 0.26883400  | 0.27389100  |
| H | 0.72521100  | 0.85445800  | 0.80844900  |
| H | -0.45173100 | 0.85179500  | -0.24825400 |
| O | -1.75853200 | 1.53014700  | -1.17006100 |
| H | -2.05736500 | 2.44382100  | -1.08800400 |
| H | -2.53582300 | 0.97905200  | -0.91462800 |
| O | 2.40977200  | 1.28491800  | 1.54609700  |

|    |             |             |             |
|----|-------------|-------------|-------------|
| H  | 2.94184400  | 0.75032300  | 0.93349900  |
| H  | 2.87008500  | 2.13242100  | 1.59453100  |
| O  | -3.67265400 | -0.19246100 | -0.25092300 |
| H  | -3.10753800 | -0.71629400 | 0.36139500  |
| H  | -4.05449700 | -0.84372800 | -0.85250800 |
| H  | 1.41865200  | -0.45534200 | -0.57521700 |
| Cl | 2.60428100  | -0.89237300 | -1.00023200 |

-----  
**W5-19A**

|    |             |             |             |
|----|-------------|-------------|-------------|
| H  | 1.94509300  | 0.78860400  | -0.38026400 |
| O  | -3.19962200 | 0.45244400  | 0.12569200  |
| H  | -3.75226800 | 0.75506100  | -0.60559600 |
| H  | -2.82737100 | -0.40740900 | -0.17959300 |
| O  | -1.99880800 | -1.85993600 | -0.68973800 |
| H  | -1.12301300 | -2.02519800 | -0.27644400 |
| H  | -2.41498400 | -2.72819700 | -0.74599500 |
| O  | 0.44331300  | -2.31428200 | 0.52130500  |
| H  | 0.45806500  | -2.30827000 | 1.48700700  |
| H  | 1.18735100  | -1.73406100 | 0.27690500  |
| O  | 0.90093300  | 1.78625200  | -0.89902900 |
| H  | 1.25958300  | 2.66218700  | -1.09380000 |
| H  | 0.15400200  | 1.93748700  | -0.26226200 |
| O  | -1.17673600 | 2.15004400  | 0.74996600  |
| H  | -1.92991900 | 1.54408100  | 0.54252100  |
| H  | -1.07827800 | 2.11214900  | 1.70894000  |
| Cl | 2.84524100  | -0.13603600 | 0.06253000  |

-----  
**W5-20A**

|    |             |             |             |
|----|-------------|-------------|-------------|
| O  | 2.64437400  | -0.78848400 | -1.24930100 |
| H  | 2.75898700  | -1.49931600 | -1.89216000 |
| H  | 1.83895300  | -0.31168100 | -1.53810000 |
| H  | -1.85694000 | -0.45574600 | 0.57667400  |
| O  | 0.23034400  | 0.62937600  | -1.49087800 |
| H  | -0.51323600 | 0.45641800  | -2.08448500 |
| H  | -0.07237200 | 0.28534200  | -0.61827400 |
| O  | -0.27963600 | 0.04886600  | 1.15980500  |
| H  | -0.06805600 | 0.98597000  | 1.33047700  |
| H  | 0.52642800  | -0.46604800 | 1.40268700  |
| O  | 2.03283700  | -1.36882700 | 1.38873700  |
| H  | 2.37355900  | -1.21951200 | 0.47856300  |
| H  | 2.76043300  | -1.12582400 | 1.97443200  |
| O  | 0.52661800  | 2.66565500  | 0.54665100  |
| H  | 0.20477900  | 3.57538700  | 0.54809900  |
| H  | 0.45316400  | 2.36704100  | -0.37674200 |
| Cl | -2.92011700 | -0.71086600 | -0.15537000 |

-----  
**W5-21A**

|   |             |             |             |
|---|-------------|-------------|-------------|
| O | -2.36630100 | 0.60403600  | -0.78990700 |
| H | -1.72146100 | 1.23653100  | -1.13882700 |
| H | -2.25191300 | 0.66927200  | 0.18177600  |
| O | 3.13473400  | -0.94642000 | 0.33400800  |
| H | 3.78362700  | -1.44505400 | -0.17889800 |
| H | 3.06559600  | -0.09126900 | -0.11935600 |
| H | 0.64694200  | 0.43937500  | -0.00253700 |
| O | -1.76769900 | 0.35004800  | 1.94149700  |
| H | -1.57771400 | 1.06771000  | 2.55863900  |
| H | -0.91554500 | -0.10662100 | 1.81346600  |
| O | 0.38115100  | -0.95767000 | 0.68042000  |
| H | -0.15972000 | -1.48113200 | 0.03428000  |
| H | 1.29758500  | -1.29620500 | 0.64311100  |

|    |             |             |             |
|----|-------------|-------------|-------------|
| O  | -1.33241000 | -1.89897500 | -1.14936300 |
| H  | -1.99822700 | -2.58480200 | -1.01621400 |
| H  | -1.82843400 | -1.04457400 | -1.12829800 |
| Cl | 1.01549800  | 1.61344800  | -0.57531700 |

---

**W5-22A**

|    |             |             |             |
|----|-------------|-------------|-------------|
| O  | 1.74942300  | -1.93950200 | -0.08794700 |
| H  | 1.54055800  | -2.56170400 | -0.79567100 |
| H  | 1.02137100  | -1.28072600 | -0.10074700 |
| O  | -0.00029100 | 0.22014700  | 0.05395000  |
| H  | -0.66405400 | 0.36619100  | -0.63817100 |
| H  | 0.66865400  | 0.94191100  | -0.04545400 |
| O  | 2.10545600  | 1.91131100  | -0.04619800 |
| H  | 2.29425200  | 2.58746100  | -0.70808100 |
| H  | 2.84291500  | 1.26110100  | -0.11693800 |
| H  | -2.87402300 | -0.01741800 | 0.39857200  |
| O  | 3.86819800  | -0.17787600 | -0.20295100 |
| H  | 3.21556300  | -0.91329700 | -0.17233900 |
| H  | 4.48091000  | -0.35786900 | 0.52080100  |
| O  | -2.06567200 | 0.05329000  | 1.89102500  |
| H  | -1.17143500 | 0.11342800  | 1.49137900  |
| H  | -2.05425000 | -0.75338000 | 2.42324600  |
| Cl | -3.20925600 | 0.00443200  | -0.88939000 |

---

**W5-23A**

|    |             |             |             |
|----|-------------|-------------|-------------|
| O  | -2.86066200 | -1.73049400 | 0.05436200  |
| O  | -3.32993800 | 1.02631600  | 0.07753500  |
| O  | -0.56610200 | 1.43292800  | 0.55063200  |
| O  | -0.31459700 | -0.94556200 | -0.56681100 |
| O  | 2.01604100  | 1.84935100  | -0.45683000 |
| H  | -3.50570500 | -2.26414200 | -0.42451400 |
| H  | -3.19608500 | -0.80968100 | 0.00706200  |
| H  | -2.41403800 | 1.35162000  | 0.19690800  |
| H  | -3.69439400 | 1.56367400  | -0.63642800 |
| H  | -0.44668900 | 0.49455700  | 0.22883100  |
| H  | -0.45661600 | 1.38727100  | 1.51090700  |
| H  | 0.45860000  | -1.46281700 | -0.29716100 |
| H  | -1.11667300 | -1.47854400 | -0.37942500 |
| H  | 2.55113100  | 0.30005100  | -0.09363000 |
| H  | 1.07668200  | 1.87415500  | -0.17181300 |
| H  | 1.99549800  | 2.02318100  | -1.40751100 |
| Cl | 2.89355000  | -0.94350800 | 0.24680400  |

---

**W5-24A**

|   |             |             |             |
|---|-------------|-------------|-------------|
| O | 2.35429400  | 0.86826400  | -0.54148700 |
| H | 2.29397500  | 0.61095200  | 0.40315400  |
| H | 1.68739800  | 1.56478200  | -0.62961800 |
| O | -3.11303900 | -1.03766600 | 0.24008100  |
| H | -3.09281600 | -0.10176500 | -0.01374700 |
| H | -3.92261700 | -1.38761900 | -0.15198400 |
| O | 1.76031100  | -0.13868500 | 2.00796700  |
| H | 0.98348400  | -0.64675300 | 1.70732800  |
| H | 2.29716000  | -0.76727300 | 2.50607800  |
| H | -0.67994900 | 0.43837600  | 0.05861000  |
| O | -0.34691000 | -1.08600600 | 0.41402200  |
| H | 0.15867000  | -1.40975700 | -0.37320700 |
| H | -1.25274600 | -1.44522700 | 0.35603800  |
| O | 1.45002000  | -1.51092800 | -1.52631500 |
| H | 1.36310500  | -1.55473100 | -2.48608800 |
| H | 1.85346100  | -0.62926100 | -1.33506900 |

Cl -1.08979600 1.68049700 -0.28209600

---

**W5-25A**

O -2.02292200 -1.32165700 -1.43960000  
H -2.67668900 -1.03184300 -2.08779600  
H -1.24092100 -0.75092800 -1.59276300  
O -0.20260800 2.98576300 -0.30641200  
H -0.17570400 3.91520900 -0.05012300  
H -0.30672800 2.49367900 0.52594000  
O 0.25153200 0.30106200 -1.23514800  
H 0.31997200 1.20736400 -1.57855400  
H 0.00632000 0.46494300 -0.29248000  
O -0.31992800 0.69254600 1.42198400  
H 0.43627300 0.28515500 1.86784100  
H -1.07409500 0.06579000 1.54561900  
O -2.43427000 -0.99568100 1.26686900  
H -2.38913100 -1.19505900 0.30374700  
H -2.52266300 -1.85441100 1.69833700  
H 1.76599100 -0.44944300 -0.63040900  
Cl 2.68723200 -0.96745400 0.15465300

---

**W5-26A**

O -0.59048200 -2.11877600 -0.33662100  
O 1.25220300 -0.97567400 1.21122700  
O 0.07329600 1.59597400 0.71691500  
O -1.86233200 0.20243800 -0.74315700  
O -4.59696900 0.55732900 0.08660700  
H -1.14024000 -1.31482200 -0.53611200  
H -0.30267400 -2.44228000 -1.19969200  
H 0.60883700 -1.50331800 0.66285100  
H 1.48477200 -1.52987100 1.96660500  
H 0.49364800 0.80625000 1.10448600  
H 0.78584700 1.99196200 0.19549700  
H -1.28249500 0.82688800 -0.25842900  
H -2.76480000 0.36389300 -0.41682800  
H -5.19765300 0.82454800 -0.62155800  
H -5.03159500 -0.20086700 0.49874100  
H 2.48956500 -0.24700100 0.22809500  
Cl 3.27359100 0.49025300 -0.53549500

---

**W5-27A**

O -0.63833300 2.33419600 -0.12804600  
H -0.41134500 2.84378700 -0.91598000  
H -0.02679900 1.56228500 -0.13540800  
O 0.79346200 -0.00948700 0.02192600  
H 1.43729800 -0.24120500 -0.68101900  
H 0.09638800 -0.68815200 -0.01250300  
H -2.52373700 -0.45863200 0.02710300  
O 3.14681800 -0.28946500 -1.38086700  
H 3.52891700 -0.24491400 -0.48139000  
H 3.56823800 -1.05068400 -1.79853700  
O -3.02068200 1.05037700 -0.00427000  
H -2.20663000 1.61212700 -0.05121500  
H -3.46640100 1.31403400 0.81208200  
O 3.26740700 -0.10399400 1.40115500  
H 2.30127200 -0.02145400 1.28970200  
H 3.51426300 0.59968500 2.01358500  
Cl -2.01181400 -1.71058200 0.03849400

---

**W5-28A**

|    |             |             |             |
|----|-------------|-------------|-------------|
| O  | 1.89306600  | 2.28999600  | 0.20520900  |
| O  | -0.11873700 | -1.26258200 | 0.56681300  |
| O  | -0.58129700 | 1.12287500  | -0.34199900 |
| O  | -3.30221200 | 1.17316300  | 0.01246800  |
| O  | -2.86088600 | -1.59263100 | -0.19643000 |
| H  | 2.36959500  | 2.91039700  | -0.36112800 |
| H  | 2.34119800  | 1.43905800  | 0.05939200  |
| H  | 1.51468100  | -1.20935500 | 0.12461700  |
| H  | -0.30841000 | -0.30804400 | 0.30315700  |
| H  | -0.14044300 | -1.27100300 | 1.53469400  |
| H  | -1.47094100 | 1.47116300  | -0.13742500 |
| H  | 0.09491700  | 1.79379000  | -0.13434500 |
| H  | -3.91828700 | 1.35809300  | 0.73127900  |
| H  | -3.27787200 | 0.19494000  | -0.05838900 |
| H  | -1.90166400 | -1.68305400 | -0.03276000 |
| H  | -3.00729900 | -2.01768800 | -1.05090200 |
| Cl | 2.79206100  | -0.97205100 | -0.17333400 |

-----  
**W5-29A**

|    |             |             |             |
|----|-------------|-------------|-------------|
| O  | -0.81891800 | 1.80606600  | -0.23619100 |
| H  | -0.74281600 | 2.25058000  | -1.09140200 |
| H  | -0.10003900 | 1.12371400  | -0.22819600 |
| O  | 0.94503700  | -0.22898500 | -0.02427800 |
| H  | 1.64312800  | -0.36753200 | -0.69607600 |
| H  | 0.37203000  | -1.02566700 | -0.02916000 |
| O  | -1.01594600 | -2.16449900 | 0.16393200  |
| H  | -1.22739300 | -2.88360900 | -0.44478800 |
| H  | -1.81476200 | -1.60623500 | 0.16828700  |
| O  | 3.38029500  | -0.06854900 | -1.32819300 |
| H  | 3.67660700  | 0.11507400  | -0.41353400 |
| H  | 4.01255100  | -0.71006000 | -1.67438000 |
| H  | -2.17352600 | 0.99923300  | -0.08659600 |
| O  | 3.30226500  | 0.28456300  | 1.43699600  |
| H  | 2.34925100  | 0.14100800  | 1.27783800  |
| H  | 3.35023300  | 1.06462800  | 2.00309800  |
| Cl | -3.27571300 | 0.22765300  | 0.06569300  |

-----  
**W5-30A**

|    |             |             |             |
|----|-------------|-------------|-------------|
| O  | -1.61007500 | 0.89524100  | 1.14612400  |
| H  | -2.45729100 | 0.97469100  | 0.67716300  |
| H  | -1.29902300 | 0.01996900  | 0.83361900  |
| O  | -0.75618400 | -1.38570400 | -0.27463400 |
| H  | -0.16362900 | -0.90983500 | -0.88004800 |
| H  | -0.12683700 | -1.93470000 | 0.23419100  |
| H  | 1.28137300  | 1.39498500  | -0.20671900 |
| O  | -3.34649800 | -0.32473300 | -0.79469800 |
| H  | -2.64669100 | -0.99880800 | -0.74496000 |
| H  | -4.13054500 | -0.79300500 | -1.10459700 |
| O  | 1.55378700  | -2.17909500 | 1.07794400  |
| H  | 2.01023100  | -1.45643900 | 0.61248700  |
| H  | 2.17880600  | -2.91495100 | 1.06847100  |
| O  | 0.47188600  | 2.35052900  | 0.47380200  |
| H  | -0.37307400 | 1.88330600  | 0.74915300  |
| H  | 0.88898400  | 2.64830300  | 1.29467800  |
| Cl | 2.01966900  | 0.42568100  | -0.91539600 |

-----  
**W5-31A**

|   |             |             |             |
|---|-------------|-------------|-------------|
| H | 1.21378600  | -0.88099000 | -0.73490200 |
| O | -2.27059500 | -1.84809600 | 1.02582500  |
| H | -2.64420900 | -2.29641800 | 1.79372300  |

|    |             |             |             |
|----|-------------|-------------|-------------|
| H  | -2.13028500 | -0.92771300 | 1.30977500  |
| O  | -0.39026100 | -0.92514600 | -0.93970300 |
| H  | -0.81438400 | -1.76406400 | -0.69154900 |
| H  | -0.68718400 | -0.32934600 | -0.20651800 |
| O  | -1.31301100 | 0.84510600  | 0.92713100  |
| H  | -1.63643700 | 1.41782400  | 0.20850400  |
| H  | -0.48147400 | 1.25661700  | 1.24732500  |
| O  | 1.26494400  | 1.57644400  | 1.63571800  |
| H  | 1.80106200  | 0.97423300  | 1.08938700  |
| H  | 1.67612700  | 2.44183200  | 1.51429500  |
| O  | -1.71380300 | 1.52479000  | -1.78687500 |
| H  | -2.33533600 | 1.72606100  | -2.49682200 |
| H  | -1.38755900 | 0.62886700  | -1.97727700 |
| Cl | 2.51810000  | -0.68421700 | -0.46780600 |

---

**W5-32A**

|    |             |             |             |
|----|-------------|-------------|-------------|
| O  | 2.82878500  | -0.14014200 | 0.54665700  |
| H  | 3.71242600  | -0.43616900 | 0.29698400  |
| H  | 2.25407800  | -0.94361900 | 0.46946300  |
| H  | -1.05829000 | 0.61051200  | -0.84933500 |
| O  | 1.18867100  | -2.25840800 | 0.27059200  |
| H  | 0.33138100  | -1.96458500 | -0.11397500 |
| H  | 0.93043800  | -2.75697000 | 1.05636800  |
| O  | -0.88116700 | 1.62157900  | -0.60493300 |
| H  | 0.13437500  | 1.76694600  | -0.53793200 |
| H  | -1.28378400 | 1.63738000  | 0.31185200  |
| O  | 1.62937000  | 2.00424500  | -0.45570000 |
| H  | 2.04856700  | 2.25100600  | -1.28987200 |
| H  | 2.13883000  | 1.21728200  | -0.11700900 |
| O  | -2.03351000 | 0.86031900  | 1.61241300  |
| H  | -2.08267300 | 0.00576500  | 1.12867100  |
| H  | -2.94331900 | 1.05332600  | 1.87462900  |
| Cl | -1.53171900 | -1.12597700 | -0.77541600 |

---

**W5-33A**

|    |             |             |             |
|----|-------------|-------------|-------------|
| O  | -1.57347400 | -0.34315900 | 1.93980900  |
| H  | -1.81746600 | -1.18608400 | 2.34498100  |
| H  | -0.58863200 | -0.34846700 | 1.89771200  |
| O  | 2.57400000  | -1.85418000 | -0.44968700 |
| H  | 3.08920400  | -2.45634700 | -0.99936900 |
| H  | 2.04939700  | -1.32432800 | -1.07489700 |
| O  | 1.09816700  | -0.12947800 | 1.36306700  |
| H  | 1.77536700  | -0.81740500 | 1.45893200  |
| H  | 0.92611600  | -0.15477500 | 0.39432700  |
| O  | 0.74151200  | 0.13451100  | -1.38170900 |
| H  | 0.98170900  | 1.07306100  | -1.25990900 |
| H  | -0.22041900 | 0.12825800  | -1.52517400 |
| H  | -2.12618200 | -0.20083100 | 0.41089300  |
| O  | 1.52571300  | 2.40163400  | 0.04415900  |
| H  | 2.16776400  | 3.10915200  | 0.17621000  |
| H  | 1.62278500  | 1.81121900  | 0.81139100  |
| Cl | -2.51688200 | -0.07694600 | -0.86824800 |

---

**W5-34A**

|   |             |             |             |
|---|-------------|-------------|-------------|
| O | 1.10840300  | 0.86179000  | -1.40888300 |
| H | 0.34148100  | 1.51768400  | -1.15033700 |
| H | 0.68276600  | 0.04479000  | -1.76068200 |
| O | -2.35090400 | -1.43776900 | 0.14054700  |
| H | -3.14238300 | -1.41527200 | -0.41133500 |
| H | -1.61632200 | -1.63930100 | -0.46926900 |

|    |             |             |             |
|----|-------------|-------------|-------------|
| O  | 0.14973900  | -1.70316900 | -1.23818200 |
| H  | 0.68826200  | -1.58229400 | -0.41539100 |
| H  | 0.47438500  | -2.52472600 | -1.63134400 |
| H  | 1.47841800  | 0.48925900  | -0.46704300 |
| O  | -0.81646400 | 2.29061500  | -0.63853400 |
| H  | -0.68773400 | 3.21993100  | -0.40927600 |
| H  | -1.03701600 | 1.80883700  | 0.22009300  |
| O  | -1.21953200 | 0.78572600  | 1.45580200  |
| H  | -1.73289600 | 0.01935400  | 1.12615800  |
| H  | -0.33040200 | 0.41171600  | 1.61698700  |
| Cl | 1.75950100  | -0.39573700 | 1.01561400  |

---

**W5-35A**

|    |             |             |             |
|----|-------------|-------------|-------------|
| O  | -0.39157000 | 1.80144600  | 0.07001900  |
| H  | 0.62938400  | 1.71000100  | -0.02316100 |
| H  | -0.67200400 | 1.42753600  | 0.94572500  |
| O  | 0.28600600  | -2.01707200 | 0.45093100  |
| H  | -0.35789900 | -1.62109600 | -0.17589700 |
| H  | -0.08121100 | -1.79108100 | 1.31752300  |
| O  | -1.56092400 | 0.16160500  | 1.82567000  |
| H  | -1.95870500 | -0.14445500 | 0.97710200  |
| H  | -2.30879500 | 0.32425100  | 2.41580300  |
| O  | 2.11699400  | 1.56073700  | -0.24385800 |
| H  | 2.73218900  | 2.06679700  | 0.30124300  |
| H  | 2.42183100  | 0.61111000  | -0.20172600 |
| H  | -0.86645800 | 1.09716700  | -0.58183900 |
| O  | 2.73326100  | -1.00033900 | -0.04525100 |
| H  | 1.86436800  | -1.44171000 | 0.13331800  |
| H  | 3.11581100  | -1.48426300 | -0.78768700 |
| Cl | -1.76403800 | -0.28266300 | -1.22238200 |

---

**W5-36A**

|    |             |             |             |
|----|-------------|-------------|-------------|
| O  | -3.37426000 | 0.62466600  | 0.64140000  |
| H  | -2.93341400 | -0.24145900 | 0.70812600  |
| H  | -4.31925500 | 0.43031000  | 0.63732300  |
| O  | -1.19854400 | -1.26056300 | 0.29731500  |
| H  | -1.10520800 | -0.46813100 | -0.28832100 |
| H  | -0.57183500 | -1.08037900 | 1.01689100  |
| H  | 1.79565200  | 0.65406500  | 0.42348900  |
| O  | 0.88143100  | -2.77541400 | -0.78021600 |
| H  | 0.98803900  | -2.71393400 | -1.73800200 |
| H  | -0.01408200 | -2.41772500 | -0.59610900 |
| O  | -1.24566900 | 1.01863200  | -1.19602400 |
| H  | -2.03375900 | 1.31838900  | -0.70735200 |
| H  | -0.52798100 | 1.61577200  | -0.93261500 |
| O  | 1.71152100  | -0.93590400 | 1.03074600  |
| H  | 1.63296300  | -1.63422800 | 0.33650800  |
| H  | 2.45595300  | -1.19782800 | 1.58802700  |
| Cl | 1.79041700  | 1.90375400  | -0.02316100 |

---

**W5-37A**

|   |             |             |             |
|---|-------------|-------------|-------------|
| O | 0.38046500  | -1.80752300 | 0.62086500  |
| O | 1.95404800  | 0.24911800  | 1.10233600  |
| O | -1.53505800 | -0.38246500 | -0.74535900 |
| O | -4.22035200 | -0.59537500 | 0.20624300  |
| O | 2.88107400  | -1.72901600 | -0.84121400 |
| H | -0.35516600 | -1.39476200 | 0.11213400  |
| H | 0.98947900  | -2.14862300 | -0.05730500 |
| H | 1.32146900  | -0.52994400 | 1.08339100  |
| H | 2.19838100  | 0.37903600  | 2.02813200  |

|    |             |             |             |
|----|-------------|-------------|-------------|
| H  | 1.09104500  | 1.48566200  | 0.41236900  |
| H  | -1.23128000 | 0.53732900  | -0.69065600 |
| H  | -2.45358100 | -0.37223000 | -0.41884900 |
| H  | -4.82772100 | -1.00922800 | -0.42134100 |
| H  | -4.29893300 | -1.13162500 | 1.00654200  |
| H  | 2.92573800  | -0.89580400 | -0.34213300 |
| H  | 3.15653200  | -1.49605200 | -1.73658200 |
| Cl | 0.34133000  | 2.39401900  | -0.21874500 |

---

**W5-38A**

|    |             |             |             |
|----|-------------|-------------|-------------|
| O  | -2.28402300 | -0.20544900 | -0.16328900 |
| H  | -1.95798000 | -0.57118600 | 0.71467300  |
| H  | -1.83604600 | -0.80371800 | -0.83449100 |
| O  | 3.80743800  | -0.09166300 | 0.03067300  |
| H  | 4.02789700  | 0.34173800  | -0.80539700 |
| H  | 4.15170200  | 0.50824300  | 0.70627800  |
| O  | -0.98243300 | -1.14776600 | 1.93323100  |
| H  | -0.11071700 | -0.96796100 | 1.51197900  |
| H  | -0.98895300 | -0.60506200 | 2.73315600  |
| O  | -0.68780200 | -1.66954300 | -1.66255200 |
| H  | -0.69861500 | -2.63500300 | -1.67606500 |
| H  | 0.10076900  | -1.41587600 | -1.12912600 |
| O  | 1.01880500  | -0.52277300 | 0.15341200  |
| H  | 0.66727000  | 0.39325900  | 0.01269200  |
| H  | 1.99115200  | -0.42184500 | 0.14743900  |
| H  | -1.72019500 | 0.74396600  | -0.23013300 |
| Cl | -0.62365700 | 2.03123500  | -0.20487100 |

---

**W5-39A**

|    |             |             |             |
|----|-------------|-------------|-------------|
| O  | 3.71625200  | -0.92132600 | 0.53135500  |
| H  | 2.74366400  | -0.98646100 | 0.57049200  |
| H  | 4.01978300  | -1.10207600 | 1.42939400  |
| O  | 1.01422100  | -0.18877400 | 0.00288200  |
| H  | 1.53948800  | 0.47619000  | -0.49295900 |
| H  | 0.43695700  | -0.61634100 | -0.64918000 |
| O  | -2.78034100 | 1.87642300  | 0.00628700  |
| H  | -2.95923900 | 1.09933500  | -0.54834600 |
| H  | -3.62868100 | 2.33253800  | 0.07507500  |
| O  | -1.22385800 | 0.17139800  | 1.58318600  |
| H  | -1.69089300 | 0.99091500  | 1.32209500  |
| H  | -0.31366000 | 0.27399400  | 1.22851200  |
| O  | 3.07885900  | 1.41316000  | -0.85362400 |
| H  | 3.62748800  | 0.72581600  | -0.42551700 |
| H  | 3.48543500  | 1.56544900  | -1.71547900 |
| H  | -1.73241500 | -0.70342800 | 0.50069600  |
| Cl | -2.11582300 | -1.34488100 | -0.67385200 |

---

**W5-40A**

|   |             |             |             |
|---|-------------|-------------|-------------|
| H | -1.79427000 | -0.62178700 | -0.05948000 |
| O | -0.26309300 | 0.02293000  | -0.18767100 |
| H | -0.53489800 | 0.95523100  | -0.06948300 |
| H | 0.32889400  | -0.19184000 | 0.55940400  |
| O | 3.44834800  | 1.13344000  | 0.10568900  |
| H | 3.16574000  | 0.58212500  | 0.85591400  |
| H | 4.27574600  | 1.54268900  | 0.38637200  |
| O | 2.25043900  | -1.00631200 | -1.39676100 |
| H | 2.81061900  | -0.21602600 | -1.29337700 |
| H | 1.35878200  | -0.63440000 | -1.50731200 |
| O | -1.89024800 | 2.27185000  | -0.08670500 |
| H | -2.66254200 | 1.68967500  | 0.00003200  |



|    |             |             |            |
|----|-------------|-------------|------------|
| H  | -2.07745300 | 3.02131300  | 0.49240900 |
| O  | 1.93161200  | -0.97043200 | 1.29309500 |
| H  | 2.11495500  | -1.26613200 | 0.36763100 |
| H  | 1.98000600  | -1.76104100 | 1.84445100 |
| Cl | -3.10482700 | -0.86538900 | 0.03542700 |

---

**W5-41A**

|    |             |             |             |
|----|-------------|-------------|-------------|
| O  | -2.54111000 | -1.78227800 | 0.08944100  |
| H  | -1.58305200 | -1.58117600 | 0.01044200  |
| H  | -2.75685800 | -2.30990500 | -0.69102700 |
| O  | -0.09007000 | -0.51559900 | -0.09045300 |
| H  | -0.53310500 | 0.34670100  | -0.04196200 |
| H  | 0.56534200  | -0.51038000 | 0.63414800  |
| O  | 2.99960500  | 1.70298900  | -0.04783700 |
| H  | 2.93618500  | 1.17286900  | 0.76497800  |
| H  | 3.52746500  | 2.47533000  | 0.18777800  |
| O  | 2.60422900  | -0.81562400 | -1.34937100 |
| H  | 2.89470800  | 0.11379200  | -1.32217000 |
| H  | 1.63755600  | -0.73890800 | -1.42122000 |
| H  | -2.99928700 | -0.13269400 | 0.02710500  |
| O  | 2.33670100  | -0.69080100 | 1.34926000  |
| H  | 2.60711300  | -0.97758800 | 0.44365300  |
| H  | 2.66371500  | -1.36457000 | 1.95775900  |
| Cl | -3.02556600 | 1.19512000  | -0.00928300 |

---

**W5-42A**

|    |             |             |             |
|----|-------------|-------------|-------------|
| O  | 2.51232500  | 0.41274500  | -0.85322100 |
| H  | 1.63163800  | 0.00523900  | -0.79793900 |
| H  | 3.14180900  | -0.29478600 | -0.62635600 |
| O  | -1.98741200 | -1.23361500 | 1.52291200  |
| H  | -1.20542100 | -0.75758000 | 1.16286200  |
| H  | -1.75597800 | -2.17101600 | 1.48261700  |
| O  | 4.45721300  | -1.59406800 | -0.19024100 |
| H  | 4.95394100  | -1.45911700 | 0.62761900  |
| H  | 5.13400500  | -1.76324500 | -0.85894700 |
| O  | -0.28501800 | 0.33238200  | 0.03295700  |
| H  | 0.11770600  | 1.16075200  | 0.37624800  |
| H  | -1.03135400 | 0.61355500  | -0.51895100 |
| O  | 1.47047200  | 2.29713400  | 0.84245200  |
| H  | 1.53673400  | 3.21389600  | 0.54843300  |
| H  | 2.07660600  | 1.79029500  | 0.25774100  |
| H  | -3.02346500 | -0.68453700 | 0.29356100  |
| Cl | -3.58334400 | -0.08059200 | -0.75210300 |

---

**Cartesian coordinates of various hydrogen bonded HBr-water clusters considered in the present investigation at MP2/aug-cc-pVDZ level of theory.**

**HBr-H<sub>2</sub>O**

\*\*\*\*\*

**W1-1B**

|    |             |             |             |
|----|-------------|-------------|-------------|
| O  | -2.57087400 | 0.00003900  | -0.09323000 |
| H  | -2.96879300 | -0.76426600 | 0.34576500  |
| H  | -2.96960700 | 0.76380300  | 0.34601600  |
| H  | -0.65980800 | 0.00005000  | -0.06588700 |
| Br | 0.77614900  | 0.00000300  | 0.00342700  |

-----  
**HBr-(H<sub>2</sub>O)<sub>2</sub>**

\*\*\*\*\*

**W2-1B**

|    |             |             |             |
|----|-------------|-------------|-------------|
| H  | 0.05122800  | 0.81799900  | -0.04333000 |
| O  | 1.64717700  | 1.50817400  | -0.10897600 |
| H  | 2.10343800  | 0.64465500  | -0.03060500 |
| O  | 2.20595100  | -1.21954600 | 0.09387700  |
| H  | 1.25683000  | -1.42474000 | 0.07502500  |
| H  | 1.91639700  | 2.00852600  | 0.67330000  |
| H  | 2.59191300  | -1.79231800 | -0.58166300 |
| Br | -1.10699500 | -0.07323300 | 0.00080200  |

-----  
**W2-2B**

|    |             |             |             |
|----|-------------|-------------|-------------|
| H  | -0.05131100 | 0.81809400  | -0.04360300 |
| O  | -1.64737100 | 1.50723700  | -0.10904800 |
| H  | -2.10339700 | 0.64393700  | -0.02634700 |
| O  | -2.20556100 | -1.21948000 | 0.09406900  |
| H  | -1.25695000 | -1.42688100 | 0.07486900  |
| H  | -1.91595400 | 2.01138500  | 0.67100900  |
| H  | -2.59254600 | -1.78864000 | -0.58394200 |
| Br | 1.10696100  | -0.07314100 | 0.00079600  |

-----  
**W2-3B**

|    |             |             |             |
|----|-------------|-------------|-------------|
| H  | -0.05735400 | 0.81257600  | -0.03967900 |
| O  | -1.64894300 | 1.51869200  | -0.09250000 |
| H  | -2.12603200 | 0.66915000  | -0.00319600 |
| O  | -2.18831600 | -1.21701900 | -0.05831100 |
| H  | -1.24484000 | -1.43793300 | -0.00210100 |
| H  | -1.89406200 | 2.02979800  | 0.69060200  |
| H  | -2.64063300 | -1.92464600 | 0.41765000  |
| Br | 1.10460000  | -0.07321000 | 0.00409200  |

-----  
**HBr-(H<sub>2</sub>O)<sub>3</sub>**

\*\*\*\*\*

**W3-1B**

|   |             |             |             |
|---|-------------|-------------|-------------|
| O | 2.89837600  | -0.27005300 | 0.03116400  |
| H | 3.48485100  | -0.24292600 | 0.79749700  |
| H | 2.45372600  | 0.60701400  | 0.01700100  |
| H | -0.37207800 | -0.97966800 | -0.01028600 |
| O | 1.36121800  | 2.02080000  | -0.02025800 |
| H | 0.45913800  | 1.65401800  | 0.02537300  |
| H | 1.34683800  | 2.59417700  | -0.79767600 |

|    |             |             |             |
|----|-------------|-------------|-------------|
| O  | 0.82208600  | -2.00036100 | -0.02464700 |
| H  | 0.86622600  | -2.49024000 | -0.85761900 |
| H  | 1.64256000  | -1.44451300 | -0.00261900 |
| Br | -1.44384900 | 0.06568700  | 0.02680700  |

-----  
**W3-2B**

|    |             |             |             |
|----|-------------|-------------|-------------|
| O  | -1.36257800 | 2.02205400  | 0.01837400  |
| H  | -1.35944700 | 2.54427300  | 0.83144100  |
| H  | -0.46010200 | 1.65760300  | -0.03425600 |
| H  | 0.37240300  | -0.96644200 | 0.09508900  |
| O  | -2.89879200 | -0.26933600 | -0.05658600 |
| H  | -2.44875400 | 0.60512900  | -0.04767000 |
| H  | -3.53426600 | -0.21998400 | -0.78104000 |
| O  | -0.82237600 | -1.99058300 | 0.22720800  |
| H  | -0.79306200 | -2.65065900 | -0.47901300 |
| H  | -1.64745200 | -1.46723300 | 0.06846400  |
| Br | 1.44401900  | 0.06857800  | -0.03328500 |

-----  
**W3-3B**

|    |             |             |             |
|----|-------------|-------------|-------------|
| H  | 0.48402100  | -0.00503200 | 1.00299500  |
| O  | 1.34616100  | -1.94489300 | -0.60517100 |
| H  | 1.28835200  | -2.89631100 | -0.44429100 |
| H  | 0.41511600  | -1.64073300 | -0.70139000 |
| O  | 1.40529200  | 1.98724500  | -0.47966600 |
| H  | 0.47197500  | 1.71468400  | -0.62251300 |
| H  | 1.78592600  | 2.05626700  | -1.36567800 |
| O  | 1.53651800  | -0.03237100 | 1.12992200  |
| H  | 1.72007900  | -0.84972000 | 0.56566500  |
| H  | 1.76719000  | 0.75868800  | 0.54208900  |
| Br | -1.20675500 | 0.02235200  | 0.01892700  |

-----  
**HBr-(H<sub>2</sub>O)<sub>4</sub>**

\*\*\*\*\*

**W4-1B**

|    |             |             |             |
|----|-------------|-------------|-------------|
| O  | -2.44991200 | 1.64635800  | -0.48006100 |
| H  | -2.17793700 | 2.00199200  | -1.33559500 |
| H  | -2.77300500 | 0.73407400  | -0.67511300 |
| O  | -3.03931500 | -0.99040600 | -0.81577600 |
| H  | -2.36618200 | -1.38031300 | -0.21148400 |
| H  | -3.87285000 | -1.41363300 | -0.57684200 |
| H  | 0.93996800  | 0.61782300  | 0.45814100  |
| O  | -0.56622500 | 1.07933800  | 1.33860600  |
| H  | -1.24789500 | 1.40884800  | 0.69496500  |
| H  | -0.56556700 | 1.70263200  | 2.07603500  |
| O  | -1.04069700 | -1.70025900 | 0.93443700  |
| H  | -0.85649400 | -0.81103500 | 1.29306100  |
| H  | -0.20221500 | -1.95165700 | 0.52102000  |
| Br | 1.99689600  | -0.03397100 | -0.28748100 |

-----  
**W4-2B**

|   |            |             |             |
|---|------------|-------------|-------------|
| H | 1.37092100 | -0.97612500 | 1.18093700  |
| O | 0.95430500 | -0.25653700 | 1.72456300  |
| H | 0.96513200 | -0.56520200 | 2.63960500  |
| H | 1.71358400 | -2.70713000 | -0.40581300 |
| O | 2.03961700 | -1.84231500 | -0.12782900 |

|    |             |             |             |
|----|-------------|-------------|-------------|
| H  | 1.80476800  | -1.22404400 | -0.86457200 |
| H  | 1.71617800  | 1.31287700  | 0.96040000  |
| O  | 1.93809900  | 1.94308000  | 0.24831000  |
| H  | 2.81762200  | 2.27467000  | 0.46766400  |
| H  | -0.63843200 | -0.08198900 | 0.84463400  |
| H  | 0.38158900  | 0.22869200  | -1.85327800 |
| O  | 1.34806100  | 0.16253300  | -1.83338300 |
| H  | 1.61128600  | 0.90234800  | -1.24552800 |
| Br | -1.77095200 | 0.02233800  | -0.05192400 |

---

**W4-3B**

|    |             |             |             |
|----|-------------|-------------|-------------|
| H  | -1.49286000 | -0.91367500 | 1.19687100  |
| O  | -0.99797000 | -0.24225300 | 1.73419200  |
| H  | -0.93910000 | -0.60080200 | 2.62887900  |
| H  | -3.03624500 | -2.04368400 | -0.27228800 |
| O  | -2.11555800 | -1.78984000 | -0.13571700 |
| H  | -1.90732000 | -1.14851400 | -0.86031500 |
| H  | 0.60177400  | -0.14651500 | 0.80920400  |
| H  | -2.39658900 | 2.60214000  | 0.50615800  |
| O  | -1.64651700 | 2.05139800  | 0.25155500  |
| H  | -1.52630200 | 1.41754500  | 0.98401300  |
| H  | -1.48777600 | 0.96289600  | -1.23860400 |
| O  | -1.35281700 | 0.19371400  | -1.83057900 |
| H  | -0.38870200 | 0.13575000  | -1.90686200 |
| Br | 1.75645700  | -0.05626500 | -0.05721900 |

---

**W4-4B**

|    |             |             |             |
|----|-------------|-------------|-------------|
| O  | 2.55591800  | 1.62138900  | -0.29061500 |
| H  | 2.76076500  | 1.87079900  | -1.20023300 |
| H  | 2.79150900  | 0.66581000  | -0.22400100 |
| H  | -0.86217900 | 1.04865400  | 0.18672900  |
| O  | 3.06338300  | -1.03130600 | 0.05801400  |
| H  | 3.67649600  | -1.55914200 | -0.46741800 |
| H  | 2.23503900  | -1.56057900 | 0.09534100  |
| O  | 0.06126900  | 2.20910500  | 0.46686200  |
| H  | 0.10085200  | 2.42237200  | 1.40950600  |
| H  | 0.99549800  | 1.99107600  | 0.20096700  |
| H  | -0.06647400 | -1.79373200 | 0.03634000  |
| O  | 0.68195100  | -2.40049400 | 0.19068200  |
| H  | 0.46465500  | -2.82807300 | 1.02935100  |
| Br | -1.79989500 | -0.09847800 | -0.12760400 |

---

**W4-5B**

|   |             |             |             |
|---|-------------|-------------|-------------|
| O | 2.55556700  | 1.62086200  | 0.29281900  |
| H | 2.79135600  | 0.66539800  | 0.22485800  |
| H | 2.75943000  | 1.86891200  | 1.20302500  |
| O | 3.06369900  | -1.03093700 | -0.06021700 |
| H | 2.23510700  | -1.55991200 | -0.09632400 |
| H | 3.67714600  | -1.55883600 | 0.46478300  |
| O | 0.68153900  | -2.39965500 | -0.18915200 |
| H | -0.06683700 | -1.79274600 | -0.03514300 |
| H | 0.46357500  | -2.82870800 | -1.02688300 |
| O | 0.06198200  | 2.20786400  | -0.46808000 |
| H | 0.99598200  | 1.99040400  | -0.20082900 |
| H | 0.10247100  | 2.41955400  | -1.41104800 |
| H | -0.86161100 | 1.04851000  | -0.18741400 |

Br -1.79996900 -0.09821900 0.12748600

---

**W4-6B**

O -2.55546700 1.62094200 -0.29261200  
H -2.79122500 0.66546100 -0.22486700  
H -2.75901500 1.86909700 -1.20286200  
O -3.06345500 -1.03102400 0.05993700  
H -2.23492900 -1.56010400 0.09622400  
H -3.67678700 -1.55871600 -0.46540400  
O -0.68150600 -2.39970500 0.18946000  
H 0.06685700 -1.79279900 0.03535500  
H -0.46348800 -2.82871200 1.02719900  
O -0.06187300 2.20792000 0.46808400  
H -0.99591200 1.99042500 0.20094000  
H -0.10233200 2.42009100 1.41094500  
H 0.86157100 1.04858500 0.18748300  
Br 1.79981900 -0.09824000 -0.12754200

---

**W4-7B**

O 3.07505200 0.94967700 -0.04945200  
H 2.26008100 1.49019600 -0.15391400  
H 3.58529100 1.10883900 -0.85310500  
O 0.72485400 2.36924600 -0.28431900  
H -0.04825600 1.77845200 -0.21835100  
H 0.54719100 3.06282300 0.36414800  
H -0.82598800 -0.98147900 -0.33323500  
O 2.41880800 -1.61167400 0.57475800  
H 2.70529800 -0.69125100 0.35760200  
H 2.42278300 -1.64964800 1.53927600  
O 0.17441700 -2.00035300 -0.81657300  
H 0.99777900 -1.93072300 -0.26075300  
H -0.14225100 -2.90862800 -0.71668600  
Br -1.78991400 0.08760700 0.13942000

---

**W4-8B**

O 0.04732600 2.24824000 0.41097300  
H 0.02668900 2.43571600 1.35971300  
H 0.99430400 2.02710000 0.20679700  
H -0.86791200 1.06206100 0.11593300  
O 2.56293600 1.57885300 -0.22914200  
H 3.35002300 2.01306300 0.12033500  
H 2.77066400 0.61365900 -0.22663400  
O 3.03343400 -1.09879700 -0.20047500  
H 2.21550300 -1.58423600 0.04907900  
H 3.30952600 -1.50241700 -1.03285600  
O 0.67302400 -2.36323400 0.43404300  
H 0.49743300 -2.72406000 1.31238500  
H -0.08541500 -1.77579700 0.25700200  
Br -1.79270200 -0.09958800 -0.15671200

---

**W4-9B**

O 0.80337500 -2.27397800 0.44670300  
H 0.01587600 -1.75637600 0.19674200  
H 0.65299400 -2.48852500 1.37687200  
H -0.83441500 0.87275400 0.46608600  
O 0.17807200 1.77448700 1.13332700

|    |             |             |             |
|----|-------------|-------------|-------------|
| H  | 0.94154500  | 1.83112900  | 0.49493500  |
| H  | -0.13693400 | 2.68046300  | 1.25762300  |
| O  | 3.08645100  | -0.82933600 | -0.10387800 |
| H  | 2.30639000  | -1.39720400 | 0.08571000  |
| H  | 3.67265400  | -1.37116800 | -0.64535100 |
| O  | 2.20271600  | 1.69320600  | -0.60570500 |
| H  | 2.59588400  | 0.79543600  | -0.48796600 |
| H  | 1.92173800  | 1.71491700  | -1.52955500 |
| Br | -1.75144700 | -0.10847000 | -0.23367600 |

---

**W4-10B**

|    |             |             |             |
|----|-------------|-------------|-------------|
| O  | -0.17410100 | 2.20404800  | -0.24348700 |
| H  | -1.07083800 | 1.93644600  | 0.08607400  |
| H  | -0.29925800 | 2.40272900  | -1.18207000 |
| O  | -2.54717100 | 1.34800300  | 0.69541000  |
| H  | -2.83669900 | 0.54606500  | 0.20236600  |
| H  | -3.33152400 | 1.90098200  | 0.79030900  |
| O  | -2.87472000 | -0.94326900 | -0.71753900 |
| H  | -2.15496400 | -1.51186300 | -0.36037000 |
| H  | -3.60828100 | -1.54148300 | -0.90160000 |
| H  | 0.82789400  | 1.04179400  | -0.11118300 |
| O  | -0.73240100 | -2.31370900 | 0.32608300  |
| H  | 0.05506300  | -1.76382600 | 0.15476400  |
| H  | -0.73162600 | -2.41449100 | 1.28729800  |
| Br | 1.82221100  | -0.08448400 | -0.01283800 |

---

**W4-11B**

|    |             |             |             |
|----|-------------|-------------|-------------|
| O  | 2.84451800  | 0.15095800  | -0.24574200 |
| H  | 3.46790800  | -0.18124900 | -0.90476200 |
| H  | 2.44925000  | -0.65505900 | 0.18796900  |
| H  | 0.07183300  | 0.69110100  | -0.95795800 |
| O  | 1.49807900  | -1.89408000 | 0.78835200  |
| H  | 0.57742100  | -1.65076300 | 0.53626300  |
| H  | 1.44964800  | -2.06586100 | 1.73783900  |
| O  | 0.79114700  | 1.43869800  | -1.00197300 |
| H  | 0.48625500  | 1.99432700  | -0.21746700 |
| H  | 1.66973800  | 0.96478500  | -0.73690300 |
| H  | -0.93567400 | 1.46769200  | 1.05187000  |
| O  | -0.40159000 | 2.28987300  | 1.13886700  |
| H  | -1.04928200 | 3.00640000  | 1.17907600  |
| Br | -1.31555200 | -0.55585600 | -0.20891300 |

---

**W4-12B**

|   |             |             |             |
|---|-------------|-------------|-------------|
| H | -0.11216900 | -0.00249200 | 1.39868100  |
| O | -1.04825000 | -0.00142500 | 1.73966400  |
| H | -0.97175600 | -0.00258600 | 2.70319600  |
| H | 0.07558300  | 0.00011600  | -1.21910800 |
| H | -1.66342000 | 1.42200000  | 0.69599800  |
| O | -1.88787100 | 1.87674700  | -0.14481400 |
| H | -1.37580100 | 2.69744600  | -0.12614500 |
| H | -1.39886100 | -2.69579000 | -0.13081100 |
| O | -1.90034200 | -1.86860700 | -0.14838200 |
| H | -1.67072700 | -1.41761800 | 0.69311500  |
| H | -1.31995000 | -0.79693600 | -1.20336400 |
| O | -0.88712500 | 0.00211400  | -1.65357100 |
| H | -1.31680700 | 0.80205900  | -1.20179200 |

Br 1.58693200 -0.00219500 0.00134500

---

**W4-13B**

H 0.90642600 1.02817500 -0.15036600  
O 0.09425400 2.19418000 -0.17538500  
H -0.79114300 1.90035400 0.19832400  
H 0.43655400 2.86673900 0.43125100  
O -2.91530500 -0.73191600 -1.16330100  
H -2.58483200 -0.82843000 -2.06545900  
H -2.31241700 -1.26785400 -0.61546000  
O -1.19625900 -1.52496300 0.98015600  
H -0.26597000 -1.34385900 0.73874600  
H -1.15712300 -2.29488200 1.56198900  
O -2.18070800 1.21442800 0.73016100  
H -1.92542900 0.42120800 1.23262200  
H -2.61499800 0.80814600 -0.04760500  
Br 1.71123100 -0.30009800 -0.12163100

---

**W4-14B**

O 1.63122500 -1.88182900 0.66998700  
H 1.60443400 -2.21273800 1.57695500  
H 0.69306700 -1.66924900 0.45558700  
H 0.04042900 0.67824800 -0.94130400  
O -0.72210000 2.40541600 0.95506300  
H -1.17608800 1.53367500 0.92489800  
H -0.45686100 2.51921100 1.87747600  
O 2.82773100 0.34974800 -0.13736700  
H 2.49303900 -0.51856400 0.21915300  
H 3.53463700 0.12589000 -0.75666800  
O 0.70893600 1.47325000 -0.99841200  
H 1.60602900 1.07055800 -0.69461600  
H 0.34914300 2.03366200 -0.24098600  
Br -1.26440500 -0.63809600 -0.18099000

---

**W4-15B**

H 1.40199100 1.66271200 -0.49507600  
O 1.09540800 2.56228900 -0.21965200  
H 1.22225700 3.11866500 -0.99825900  
H 4.11498200 -0.80786400 1.39194100  
O 3.77723000 -1.26675200 0.61158600  
H 4.56809900 -1.54205900 0.12959900  
H -0.51645300 2.33089000 0.31209300  
O -1.43074000 2.05809900 0.58512700  
H -1.47659800 2.23544600 1.53473000  
H -1.50823000 0.49820200 0.28000300  
H 0.89915500 -0.47972300 -0.75445700  
O 1.72385400 0.01448200 -0.89683600  
H 2.39371600 -0.45592400 -0.36675100  
Br -1.49785500 -0.95729400 -0.04787500

---

**W4-16B**

H -1.02087800 1.11052300 0.86474300  
O -0.28062200 1.77747700 0.74222700  
H -0.07869500 2.10936300 1.62865000  
H -3.83085200 0.58915200 -1.82504600  
O -4.15681200 0.19661400 -1.00408800

|    |             |             |             |
|----|-------------|-------------|-------------|
| H  | -4.94912300 | 0.70651300  | -0.79006100 |
| H  | 0.86368500  | 0.97624800  | 0.22602400  |
| H  | -0.12546200 | -2.87544100 | 1.01209200  |
| O  | -0.43849000 | -2.23582700 | 0.35958800  |
| H  | 0.36194900  | -1.74139200 | 0.10346700  |
| H  | -1.64536300 | -0.93382600 | 0.79715100  |
| O  | -2.11935400 | -0.09544400 | 0.97882300  |
| H  | -2.83448300 | -0.05045200 | 0.31779400  |
| Br | 1.97775600  | 0.08476400  | -0.31277700 |

---

**W4-17B**

|    |             |             |             |
|----|-------------|-------------|-------------|
| O  | -1.58888300 | -1.96373100 | 0.55329500  |
| H  | -1.58117200 | -2.43816900 | 1.39419800  |
| H  | -0.65101400 | -1.70458900 | 0.40368100  |
| O  | 0.50944500  | 2.35449700  | 1.02277400  |
| H  | 0.99529700  | 1.49800000  | 0.99002500  |
| H  | 1.19851000  | 3.03253800  | 1.00752300  |
| H  | -0.06460200 | 0.64456100  | -0.97342400 |
| O  | -2.84739300 | 0.26259300  | -0.19347600 |
| H  | -2.50265500 | -0.59278000 | 0.18023100  |
| H  | -3.37411000 | 0.66685200  | 0.50788500  |
| O  | -0.74664500 | 1.42347200  | -1.04795100 |
| H  | -1.63403300 | 1.02385200  | -0.70702100 |
| H  | -0.38227300 | 2.01063300  | -0.31259300 |
| Br | 1.29668200  | -0.59301500 | -0.14764700 |

---

**W4-18B**

|    |             |             |             |
|----|-------------|-------------|-------------|
| O  | 3.05945600  | 0.05486800  | 1.48121200  |
| H  | 3.03246700  | 0.78714900  | 2.10980400  |
| H  | 3.45119300  | 0.42948800  | 0.66724200  |
| O  | 3.32337900  | 0.72809400  | -1.21739500 |
| H  | 3.87882400  | 0.41320500  | -1.94078300 |
| H  | 2.49660400  | 0.21546500  | -1.28490000 |
| O  | 1.00822600  | -0.57835000 | -0.23154300 |
| H  | 0.60746300  | -1.47007500 | -0.19113400 |
| H  | 1.58070000  | -0.48504000 | 0.56314800  |
| O  | -0.85235700 | -2.64683300 | -0.06424600 |
| H  | -1.56610600 | -1.98898900 | -0.02610900 |
| H  | -1.16236800 | -3.30873200 | -0.69548400 |
| H  | -0.43518000 | 0.25486500  | -0.08028600 |
| Br | -1.83409200 | 0.70544100  | 0.03240800  |

---

**W4-19B**

|   |             |             |             |
|---|-------------|-------------|-------------|
| O | -3.05783400 | 0.05838000  | 1.48196500  |
| H | -3.45035800 | 0.42927800  | 0.66661200  |
| H | -3.02869400 | 0.79417200  | 2.10636500  |
| H | 0.43451300  | 0.25481300  | -0.08052700 |
| O | -1.00761200 | -0.57741600 | -0.23044600 |
| H | -0.60801300 | -1.46956800 | -0.18843700 |
| H | -1.58125500 | -0.48238700 | 0.56333700  |
| O | 0.85259700  | -2.64661100 | -0.06146000 |
| H | 1.16266000  | -3.30789700 | -0.69331100 |
| H | 1.56564200  | -1.98796800 | -0.02377700 |
| O | -3.32534300 | 0.72320800  | -1.21726700 |
| H | -2.49776000 | 0.21225400  | -1.28719100 |
| H | -3.87993400 | 0.41192900  | -1.94284700 |



Br 1.83396400 0.70528200 0.03135500

-----  
**W4-20B**

H -1.06440700 3.36527300 0.36311800  
O -0.80429000 2.63447500 -0.21218100  
H -1.53173100 1.99451400 -0.14179100  
H -0.46284400 -0.27837600 -0.00302100  
H 3.30205900 -1.30531700 -1.87327700  
O 3.36973500 -0.52822500 -1.30472900  
H 2.46814400 -0.15625300 -1.27456800  
H 3.49363100 -0.50451500 0.59374100  
O 3.09920600 -0.29007000 1.46326800  
H 3.79321200 0.16815800 1.95264400  
H 0.63885400 1.43084300 -0.07939100  
O 1.01378000 0.52869400 -0.12874100  
H 1.60953500 0.42010000 0.64446600  
Br -1.87639700 -0.68266900 0.03649000

-----  
**W4-21B**

H 1.66569100 0.85609900 -0.00249500  
H 0.70154200 2.81414700 -0.78944300  
O 0.66440800 2.26535000 0.00543900  
H -0.17166300 1.75594000 -0.06869200  
H -4.12814300 -0.07050900 -2.00702600  
O -3.71735500 -0.56267800 -1.28585200  
H -2.79102700 -0.25775600 -1.25820700  
H -3.88896400 -0.37269400 0.61553000  
O -3.45119700 -0.14374500 1.45894200  
H -3.70819100 -0.83645200 2.07979700  
H -0.51332900 -0.41099700 -0.03393800  
O -1.23231800 0.23543300 -0.12244600  
H -1.82747200 0.07203600 0.64237700  
Br 2.18723600 -0.51156300 0.01066900

-----  
**HBr-(H<sub>2</sub>O)<sub>5</sub>**

\*\*\*\*\*

**W5-1B**

O -2.97139000 0.63024500 0.11785400  
O -1.77850600 -0.99696100 -1.62694300  
O -0.76837500 1.13652100 1.33683300  
O 0.51945600 2.86670600 -0.03927800  
O 2.29352100 1.17222400 -1.09378900  
H -3.68731500 0.21564400 0.61632600  
H -2.68951100 -0.03787700 -0.56135500  
H -0.95581500 -1.21860200 -1.13251500  
H -2.05532200 -1.82887400 -2.03128200  
H -0.22245100 0.28660900 1.13627600  
H -0.30419600 1.87903300 0.80049000  
H -1.67904500 0.96156300 0.90797300  
H 0.06160900 3.30881900 -0.76636800  
H 1.23853200 2.32810100 -0.46827600  
H 1.93443900 0.32181600 -0.75113200  
H 3.21902000 1.16789800 -0.81624800  
Br 0.76521200 -1.31011500 0.38596200

**W5-2B**

|    |             |             |             |
|----|-------------|-------------|-------------|
| H  | -0.23968700 | -1.19448100 | 1.32735500  |
| O  | 1.11230400  | -0.10372500 | -1.63610600 |
| H  | 0.13359000  | -0.16479200 | -1.31675800 |
| H  | 1.43531800  | 0.78927400  | -1.27005200 |
| O  | 1.82947200  | 2.10644000  | -0.50785600 |
| H  | 1.24354200  | 2.13833100  | 0.28736600  |
| H  | 1.68676800  | 2.94074400  | -0.97339000 |
| O  | 0.13344400  | 1.69354400  | 1.57656000  |
| H  | -0.57046700 | 1.22977000  | 1.05814800  |
| H  | -0.34051400 | 2.33967700  | 2.11686200  |
| O  | 0.57541400  | -1.34050600 | 1.85408400  |
| H  | 1.70250500  | -1.73936400 | 0.67178300  |
| H  | 0.72775700  | -0.46371600 | 2.24122800  |
| O  | 2.26912500  | -1.81188900 | -0.14572000 |
| H  | 1.60860600  | -0.83902600 | -1.11454500 |
| H  | 2.30464000  | -2.75086700 | -0.36873400 |
| Br | -1.63000400 | -0.18961300 | -0.33677000 |

---

**W5-3B**

|    |             |             |             |
|----|-------------|-------------|-------------|
| H  | 0.08725300  | -0.23831000 | -1.33543400 |
| O  | 0.51338700  | -1.20782200 | 1.94217700  |
| H  | 0.67776300  | -0.32196900 | 2.30157800  |
| H  | -0.29516700 | -1.06610100 | 1.40262800  |
| O  | 2.18009300  | -1.86287100 | -0.02865400 |
| H  | 1.62017900  | -1.70768000 | 0.78227500  |
| H  | 2.20904700  | -2.81971600 | -0.15649700 |
| O  | 0.19143500  | 1.82731700  | 1.43225400  |
| H  | -0.51320800 | 1.33519400  | 0.94101100  |
| H  | -0.26647800 | 2.58884400  | 1.81314200  |
| O  | 1.06527500  | -0.25338100 | -1.66986700 |
| H  | 1.45458900  | 0.63124400  | -1.35100000 |
| H  | 1.51995100  | -0.97198400 | -1.09729800 |
| O  | 1.90968100  | 1.97564900  | -0.66862400 |
| H  | 2.82806700  | 2.05974200  | -0.38120800 |
| H  | 1.36011900  | 2.06239400  | 0.14904400  |
| Br | -1.64460200 | -0.15379400 | -0.31790100 |

---

**W5-4B**

|    |             |             |             |
|----|-------------|-------------|-------------|
| O  | -0.27454300 | -0.47090900 | 1.55579700  |
| H  | -0.75545600 | -1.08629400 | 0.96529300  |
| H  | -0.73983300 | 0.37702200  | 1.40969400  |
| O  | -0.54671200 | 0.59135900  | -1.75491300 |
| H  | -0.90138600 | -0.30331100 | -1.59177400 |
| H  | 0.40368100  | 0.49569600  | -1.56981800 |
| O  | -1.80807000 | -1.68008000 | -0.51909700 |
| H  | -2.67983200 | -1.27460800 | -0.29968300 |
| H  | -1.99513600 | -2.58366400 | -0.80198900 |
| O  | -1.72208200 | 1.70869700  | 0.38401200  |
| H  | -1.66798200 | 2.67068500  | 0.44297900  |
| H  | -1.26246200 | 1.46030200  | -0.46236500 |
| O  | -3.86809200 | -0.05068000 | 0.17950400  |
| H  | -3.27752100 | 0.71691800  | 0.33333800  |
| H  | -4.39013700 | -0.13481700 | 0.98720000  |
| H  | 1.10088800  | -0.26293600 | 0.84144700  |
| Br | 2.34060500  | -0.02463100 | 0.02809300  |

---

**W5-5B**

|    |             |             |             |
|----|-------------|-------------|-------------|
| O  | -1.57990200 | 2.29071900  | 0.02061400  |
| H  | -1.15875400 | 2.58302400  | -0.79762600 |
| H  | -2.36480500 | 1.76422700  | -0.26945200 |
| H  | 1.46030600  | 0.47362500  | 0.54091200  |
| O  | 0.03359600  | 0.83423000  | 1.55482900  |
| H  | 0.12987600  | 1.26024400  | 2.41619200  |
| H  | -0.57557200 | 1.41781500  | 1.02439400  |
| O  | -3.69891500 | 0.72654000  | -0.62875100 |
| H  | -3.47289600 | -0.23216300 | -0.56299900 |
| H  | -4.19837600 | 0.81156900  | -1.44967300 |
| O  | -2.93986300 | -1.87963600 | -0.39312100 |
| H  | -2.05161100 | -1.91874000 | 0.03289100  |
| H  | -3.48587800 | -2.48217400 | 0.12672700  |
| O  | -0.50503700 | -1.85152400 | 0.85415400  |
| H  | -0.36115200 | -0.96083400 | 1.22994100  |
| H  | 0.28759700  | -1.99972000 | 0.31894100  |
| Br | 2.43749200  | -0.04798600 | -0.39634400 |

---

**W5-6B**

|    |             |             |             |
|----|-------------|-------------|-------------|
| O  | -0.73895600 | 1.97052900  | 1.35010200  |
| H  | 0.13542500  | 2.14682000  | 0.97399300  |
| H  | -0.64065000 | 1.07312500  | 1.72232700  |
| O  | -1.92258200 | -2.15480300 | 0.36112200  |
| H  | -2.87884200 | -2.10349200 | 0.48482000  |
| H  | -1.75293400 | -1.69180400 | -0.49960100 |
| O  | -1.32220300 | -0.68707500 | -1.83426000 |
| H  | -1.71640800 | 0.17831600  | -1.58641600 |
| H  | -0.36800400 | -0.52038200 | -1.84109800 |
| O  | -2.50535600 | 1.54322600  | -0.73422000 |
| H  | -2.83845800 | 2.36351600  | -1.11667600 |
| H  | -1.92490500 | 1.81439800  | 0.01211800  |
| H  | 0.98240200  | -0.45584300 | 0.72588500  |
| O  | -0.25583900 | -0.78838100 | 1.89414600  |
| H  | -0.93015300 | -1.34971700 | 1.41510700  |
| H  | 0.01177900  | -1.29600700 | 2.67156700  |
| Br | 1.88229200  | 0.02208900  | -0.32163300 |

---

**W5-7B**

|   |             |             |             |
|---|-------------|-------------|-------------|
| O | 1.68702000  | 1.58143100  | 0.82359900  |
| H | 2.43141200  | 1.31298800  | 0.22423000  |
| H | 2.09253200  | 2.12080200  | 1.51428300  |
| O | 0.82161600  | -1.14777500 | 1.20378800  |
| H | 1.01872300  | -0.19324500 | 1.24304700  |
| H | -0.09945100 | -1.18329900 | 0.89867300  |
| H | -1.63521600 | 0.87592400  | -0.19818600 |
| O | -0.77359200 | 2.31683300  | -0.18099000 |
| H | 0.14769500  | 2.13755700  | 0.11298600  |
| H | -0.69083500 | 2.72041000  | -1.05532200 |
| O | 3.63368500  | 0.59519500  | -0.73678000 |
| H | 3.45288700  | -0.37634500 | -0.69292200 |
| H | 3.71700800  | 0.79438000  | -1.67732500 |
| O | 2.83009500  | -1.97155200 | -0.44198800 |
| H | 2.05919200  | -1.80923900 | 0.15313200  |
| H | 3.34900200  | -2.65623300 | -0.00259500 |

Br -2.32667300 -0.42105000 -0.16745800

---

**W5-8B**

O -2.34838900 0.38284100 1.38645400  
H -1.80025800 -0.44517500 1.49378900  
H -2.92556100 0.42487500 2.15858600  
O -0.46023600 2.01808300 0.10191000  
H -0.95259500 1.89326000 -0.72840900  
H -1.07079700 1.62395000 0.75961100  
H 0.79577200 1.07721500 0.04411000  
O -2.50308400 0.53959100 -1.37313600  
H -2.76029500 0.44614200 -0.43192300  
H -3.32986400 0.60353300 -1.86754300  
O -0.77412900 -1.75485500 1.35048500  
H -0.76781300 -1.89976100 0.37501100  
H 0.14077900 -1.48913800 1.52919400  
O -0.72615200 -1.72463100 -1.42213800  
H 0.15903200 -1.34092600 -1.52365000  
H -1.32785300 -0.97566800 -1.59531800  
Br 1.95243900 0.12552800 -0.01605900

---

**W5-9B**

O 0.72471700 1.72306300 1.42395500  
H -0.16039400 1.33814300 1.52181500  
H 1.32655600 0.97433300 1.59745600  
O 2.50055300 -0.54290700 1.37435700  
H 3.32690500 -0.61047200 1.86901200  
H 2.75866300 -0.44778100 0.43363500  
O 2.34726800 -0.38107700 -1.38608700  
H 2.92277100 -0.42503100 -2.15934800  
H 1.80070100 0.44805300 -1.49280500  
H -0.79486900 -1.07825000 -0.04679200  
O 0.77592900 1.75867900 -1.34820800  
H 0.77021800 1.90279500 -0.37259500  
H -0.13909500 1.49305200 -1.52646400  
O 0.45929000 -2.01833400 -0.10697700  
H 0.94980200 -1.89777600 0.72506000  
H 1.07081300 -1.61966500 -0.76124400  
Br -1.95126100 -0.12550800 0.01588400

---

**W5-10B**

O -0.26483800 1.29532400 -1.56780500  
H -1.01016700 0.63551300 -1.69635400  
H -0.10197200 1.69919800 -2.43018800  
O -0.81375400 2.00286000 1.12496700  
H 0.02852300 1.73818700 1.52197800  
H -0.62016500 1.99989400 0.16754100  
O -2.67076500 -0.01647200 1.23457600  
H -2.06232400 0.75475700 1.31822800  
H -3.34271300 0.10949800 1.91560300  
H 1.00993200 0.46086300 -0.76946300  
O -2.19659100 -0.50012200 -1.60320600  
H -1.75065000 -1.26762300 -1.18268000  
H -2.77039900 -0.20669100 -0.87398300  
O -1.03903400 -2.20083900 0.28975800  
H -1.52194400 -1.60273900 0.89030800

|    |             |             |            |
|----|-------------|-------------|------------|
| H  | -0.10847300 | -1.96362600 | 0.42062600 |
| Br | 1.94657700  | -0.20009200 | 0.13977300 |

---

**W5-11B**

|    |             |             |             |
|----|-------------|-------------|-------------|
| O  | -0.69074700 | 2.33393900  | 0.23262000  |
| H  | 0.29440600  | 2.35316200  | 0.06914000  |
| H  | -0.92306700 | 3.21982200  | 0.53991800  |
| O  | -1.11363700 | 0.12537100  | 1.57160600  |
| H  | -0.99842100 | 1.04461900  | 1.16840900  |
| H  | -1.92215200 | -0.27914200 | 1.09232500  |
| O  | -2.93062800 | -0.87391500 | 0.08071600  |
| H  | -2.51027900 | -0.56570300 | -0.76527400 |
| H  | -3.87041500 | -0.66169800 | 0.02759100  |
| O  | -1.32736300 | 0.08471500  | -1.83713000 |
| H  | -1.17125400 | 1.00332900  | -1.56628200 |
| H  | -0.51136800 | -0.37106800 | -1.53598600 |
| O  | 1.92044400  | 2.04551500  | -0.12683900 |
| H  | 1.91126800  | 1.06015100  | -0.07409100 |
| H  | 2.38140800  | 2.23695000  | -0.95430600 |
| H  | -0.29371600 | -0.38968300 | 1.17896000  |
| Br | 1.16425800  | -1.09645000 | 0.04148000  |

---

**W5-12B**

|    |             |             |             |
|----|-------------|-------------|-------------|
| O  | 0.30314200  | 1.71836800  | 1.28416000  |
| H  | -0.61220200 | 1.94474800  | 1.06793400  |
| H  | 0.33842900  | 0.74854700  | 1.15177000  |
| O  | 0.53661500  | -0.93271600 | 0.38334900  |
| H  | 1.12387300  | -0.69568600 | -0.36462900 |
| H  | 1.05444800  | -1.62613600 | 0.82923800  |
| O  | 2.68225100  | -0.16262800 | -1.24059300 |
| H  | 2.77218800  | -0.15832400 | -2.20159000 |
| H  | 2.70094400  | 0.78882900  | -0.96711800 |
| H  | -1.22996400 | -0.73648400 | 0.03186300  |
| O  | 2.98568900  | -2.32657800 | 0.60473100  |
| H  | 3.22991700  | -1.61820100 | -0.01767000 |
| H  | 3.78665300  | -2.51603100 | 1.10761200  |
| O  | 2.40883400  | 2.36135900  | -0.32804600 |
| H  | 1.62925000  | 2.26639500  | 0.26990600  |
| H  | 3.06597000  | 2.84337200  | 0.18862100  |
| Br | -2.54833600 | -0.18581300 | -0.19213500 |

---

**W5-13B**

|   |             |             |             |
|---|-------------|-------------|-------------|
| O | 2.79512600  | 0.39177100  | -1.32075800 |
| H | 3.49364200  | -0.07693700 | -0.83069600 |
| H | 2.04670300  | -0.22189100 | -1.20776700 |
| O | 0.90993800  | -1.36938400 | -0.00454500 |
| H | 0.60868800  | -0.65197200 | 0.59167200  |
| H | 0.08986600  | -1.78976800 | -0.29795200 |
| O | 0.05870600  | 0.93707800  | 1.33892400  |
| H | 0.10820800  | 1.13554900  | 2.28284000  |
| H | 0.62851500  | 1.61659500  | 0.88639000  |
| O | 3.68086100  | -1.61078400 | 0.54045800  |
| H | 2.74137500  | -1.85566600 | 0.45600200  |
| H | 4.15629000  | -2.44676600 | 0.61493600  |
| H | -1.50791200 | 0.45039600  | 0.54112700  |
| O | 1.74707400  | 2.50649700  | 0.00594900  |

|    |             |             |             |
|----|-------------|-------------|-------------|
| H  | 2.21994500  | 1.82028300  | -0.52951900 |
| H  | 1.47829100  | 3.18523600  | -0.62524900 |
| Br | -2.55992200 | -0.22875700 | -0.18177200 |

---

**W5-14B**

|    |             |             |             |
|----|-------------|-------------|-------------|
| O  | 1.36222300  | -0.06733000 | 1.85232800  |
| H  | 0.49075900  | -0.43271600 | 1.63032400  |
| H  | 1.36980500  | 0.78666300  | 1.38066600  |
| O  | 1.44997300  | 0.03675000  | -1.76745700 |
| H  | 0.59129000  | -0.40991300 | -1.70561600 |
| H  | 2.06009600  | -0.55877400 | -1.27725200 |
| H  | -1.60994900 | 0.62724900  | 0.01090700  |
| O  | 1.21825200  | 2.09487600  | -0.08839100 |
| H  | 1.84064100  | 2.80426400  | -0.29208300 |
| H  | 1.35819900  | 1.39997900  | -0.79213100 |
| O  | -1.49434100 | 2.21214700  | 0.05387200  |
| H  | -0.51694800 | 2.35146300  | 0.02852000  |
| H  | -1.78894500 | 2.57686000  | 0.90024000  |
| O  | 3.07957600  | -1.25022000 | 0.03269300  |
| H  | 2.54882300  | -0.97659800 | 0.81376800  |
| H  | 3.36226500  | -2.15552400 | 0.20737800  |
| Br | -1.56090000 | -0.86350700 | -0.04483100 |

---

**W5-15B**

|    |             |             |             |
|----|-------------|-------------|-------------|
| O  | -1.83417100 | -0.49529500 | -1.69392000 |
| H  | -1.34940500 | -1.11776500 | -1.12336100 |
| H  | -1.32102500 | 0.32499700  | -1.60034500 |
| O  | -1.75889400 | 0.42793100  | 1.64620900  |
| H  | -1.38362000 | -0.46473400 | 1.55053400  |
| H  | -2.65019000 | 0.34526700  | 1.24357100  |
| O  | -0.40142000 | -1.90258600 | 0.47603300  |
| H  | 0.52312400  | -1.60466700 | 0.39201000  |
| H  | -0.33869400 | -2.84697400 | 0.67053500  |
| O  | -0.34140700 | 1.62994900  | -0.23938100 |
| H  | -0.29977700 | 2.59103700  | -0.14147900 |
| H  | -0.89090400 | 1.29223600  | 0.52966100  |
| H  | 1.08955000  | 0.88855100  | -0.13668600 |
| O  | -3.92536200 | 0.25218800  | -0.05709000 |
| H  | -3.33316800 | -0.08668400 | -0.76601600 |
| H  | -4.75919300 | -0.22150000 | -0.15730600 |
| Br | 2.30866700  | 0.04579200  | -0.04331200 |

---

**W5-16B**

|   |             |             |             |
|---|-------------|-------------|-------------|
| O | 3.11630700  | -1.11454000 | -1.28137100 |
| H | 3.09398200  | -1.88439500 | -1.86317100 |
| H | 2.35417200  | -0.56447800 | -1.55786100 |
| H | -1.21417400 | -0.11661300 | 0.72263400  |
| O | 0.87861900  | 0.56718700  | -1.48805000 |
| H | 0.07432500  | 0.43271300  | -2.00842600 |
| H | 0.60992100  | 0.33207600  | -0.56846700 |
| O | 0.48190000  | 0.25309600  | 1.22080500  |
| H | 0.79897600  | 1.17142700  | 1.30982600  |
| H | 1.24378100  | -0.32589700 | 1.46167000  |
| O | 2.64021800  | -1.39825800 | 1.43256100  |
| H | 2.92555700  | -1.36549100 | 0.49215300  |
| H | 3.43246200  | -1.19310300 | 1.94418100  |

|    |             |             |             |
|----|-------------|-------------|-------------|
| O  | 1.50915900  | 2.71782600  | 0.34078200  |
| H  | 1.29926900  | 3.65711400  | 0.27173200  |
| H  | 1.34667700  | 2.35063200  | -0.54585800 |
| Br | -2.42784500 | -0.30561400 | -0.04160600 |

---

**W5-17B**

|    |             |             |             |
|----|-------------|-------------|-------------|
| O  | 3.06626000  | -0.80756000 | 0.47652300  |
| H  | 3.84242900  | -1.35328600 | 0.30215800  |
| H  | 2.30205800  | -1.43764300 | 0.50253200  |
| H  | -0.47659700 | 1.12493200  | -0.74181700 |
| O  | 0.92154300  | -2.43986700 | 0.47535400  |
| H  | 0.14575400  | -1.92903100 | 0.15153500  |
| H  | 0.61488400  | -2.81033300 | 1.31323800  |
| O  | 0.05988200  | 1.99312500  | -0.57250800 |
| H  | 1.06452200  | 1.75985200  | -0.65900500 |
| H  | -0.17249800 | 2.14451800  | 0.39619200  |
| O  | 2.51700800  | 1.43983400  | -0.80404000 |
| H  | 2.82276200  | 1.37131200  | -1.71772200 |
| H  | 2.77533300  | 0.58152300  | -0.36502500 |
| O  | -0.86515600 | 1.75328700  | 1.84041800  |
| H  | -1.28495200 | 0.93573500  | 1.48753600  |
| H  | -1.59693600 | 2.27434400  | 2.19767900  |
| Br | -1.58951600 | -0.51921300 | -0.40552200 |

---

**W5-18B**

|    |             |             |             |
|----|-------------|-------------|-------------|
| O  | -1.89465200 | 2.52311300  | -0.12955200 |
| H  | -2.08683400 | 2.97018500  | -0.96285500 |
| H  | -2.50580800 | 1.74725800  | -0.10904200 |
| O  | 0.68344000  | 2.35610100  | 0.50669500  |
| H  | 0.72209700  | 2.55070800  | 1.45311300  |
| H  | -0.28318500 | 2.37507000  | 0.26803300  |
| H  | 1.38989200  | 1.07603100  | 0.16460300  |
| O  | -0.12055900 | -2.57282900 | 0.51447800  |
| H  | 0.11750900  | -2.86740900 | 1.40254100  |
| H  | 0.52839100  | -1.87450700 | 0.30852400  |
| O  | -3.62256700 | 0.44454600  | -0.08910100 |
| H  | -4.29553300 | 0.43357700  | 0.60208000  |
| H  | -3.29530400 | -0.48436900 | -0.13802800 |
| O  | -2.74071400 | -2.12752000 | -0.18265900 |
| H  | -2.86045000 | -2.62813200 | -0.99885000 |
| H  | -1.80471600 | -2.28464600 | 0.07221200  |
| Br | 2.16955300  | -0.17145900 | -0.20060600 |

---

**W5-19B**

|   |             |             |             |
|---|-------------|-------------|-------------|
| O | -2.39572900 | -0.24682200 | 1.93783000  |
| H | -2.52683600 | 0.34237100  | 2.69050300  |
| H | -1.65586400 | 0.14617100  | 1.42663600  |
| O | -0.53846000 | 0.65797100  | 0.07777700  |
| H | -0.07181300 | 1.51738700  | 0.08954100  |
| H | -1.12624000 | 0.65627100  | -0.71831700 |
| O | -2.36512900 | 0.34597700  | -1.89444800 |
| H | -2.77571800 | 1.03103100  | -2.43575200 |
| H | -3.09992500 | -0.03481000 | -1.35749700 |
| O | 1.46314100  | 2.57582800  | 0.35933200  |
| H | 2.12030000  | 1.86462200  | 0.27678100  |
| H | 1.81369600  | 3.29470600  | -0.18209800 |

|    |             |             |             |
|----|-------------|-------------|-------------|
| O  | -4.17306100 | -0.67273100 | -0.11413300 |
| H  | -3.64424000 | -0.55952100 | 0.70823300  |
| H  | -4.38983800 | -1.61301500 | -0.14099800 |
| H  | 0.86574600  | -0.28196300 | -0.06441500 |
| Br | 2.24470400  | -0.78985800 | -0.09209900 |

---

**W5-20B**

|    |             |             |             |
|----|-------------|-------------|-------------|
| O  | -0.87691700 | -1.86949400 | -0.21457100 |
| H  | -1.28969500 | -1.47507300 | -1.00005600 |
| H  | 0.03969200  | -1.53990600 | -0.22312400 |
| O  | -3.13928300 | -0.26775300 | -1.30364100 |
| H  | -3.40534900 | -0.50884300 | -0.39675600 |
| H  | -3.92222400 | -0.41128400 | -1.84975300 |
| O  | -2.61826300 | -0.64665300 | 1.41890500  |
| H  | -2.82763600 | -1.04826300 | 2.27044700  |
| H  | -1.89991100 | -1.19793500 | 1.01903800  |
| H  | 1.50634700  | 0.95573800  | -0.07781000 |
| O  | 0.76007800  | 2.29599800  | -0.18208500 |
| H  | -0.20392800 | 2.15248600  | 0.01766900  |
| H  | 1.06904900  | 2.94296100  | 0.46685900  |
| O  | -1.84117000 | 1.83479500  | 0.25984500  |
| H  | -2.04128700 | 1.12648700  | 0.90072600  |
| H  | -2.27055000 | 1.50069200  | -0.54566600 |
| Br | 2.19914100  | -0.37920600 | -0.01169100 |

---

**W5-21B**

|    |             |             |             |
|----|-------------|-------------|-------------|
| O  | 2.40206600  | -1.01470800 | -0.70527600 |
| H  | 1.58884500  | -1.49203800 | -0.92780100 |
| H  | 2.34400600  | -0.90685600 | 0.26764500  |
| O  | -2.40178200 | 2.15861600  | 0.30255000  |
| H  | -2.89307100 | 2.72459300  | -0.30691100 |
| H  | -2.60767700 | 1.25300600  | 0.01860100  |
| H  | -0.39309200 | 0.12741900  | 0.18236600  |
| O  | 2.06210600  | -0.24153800 | 1.97828000  |
| H  | 1.70778200  | -0.81820000 | 2.66715500  |
| H  | 1.35992500  | 0.41406300  | 1.81582900  |
| O  | 0.24807300  | 1.43862100  | 0.58655600  |
| H  | 0.86325600  | 1.67590400  | -0.15920200 |
| H  | -0.55012700 | 2.00149100  | 0.50619100  |
| O  | 1.99490400  | 1.58134300  | -1.41742100 |
| H  | 2.81697000  | 2.08700400  | -1.42336500 |
| H  | 2.26522500  | 0.64000900  | -1.27813800 |
| Br | -1.16985700 | -1.11671600 | -0.20913900 |

---

**W5-22B**

|   |             |             |             |
|---|-------------|-------------|-------------|
| O | -3.34045100 | -1.88201100 | -0.05270900 |
| O | -4.04560200 | 0.80059700  | 0.28041200  |
| O | -1.30698000 | 1.44282700  | 0.57456500  |
| O | -0.89630400 | -0.83860600 | -0.69846100 |
| O | 1.09500900  | 2.25206700  | -0.62458000 |
| H | -3.95078600 | -2.41429500 | -0.57660700 |
| H | -3.75705500 | -0.99607700 | 0.01358500  |
| H | -3.15639700 | 1.20307400  | 0.36174400  |
| H | -4.52520700 | 1.37391300  | -0.32989800 |
| H | -1.11386000 | 0.54172300  | 0.18959000  |
| H | -1.09916600 | 1.36465800  | 1.51636000  |



|    |             |             |             |
|----|-------------|-------------|-------------|
| H  | -0.08430400 | -1.30742300 | -0.45565800 |
| H  | -1.65316200 | -1.43838400 | -0.52074300 |
| H  | 1.85143100  | 0.79047600  | -0.23368000 |
| H  | 0.18783400  | 2.13333500  | -0.26731500 |
| H  | 0.97752600  | 2.34255300  | -1.58026600 |
| Br | 2.40793600  | -0.50835900 | 0.17283000  |

-----  
**W5-23B**

|    |             |             |             |
|----|-------------|-------------|-------------|
| O  | -2.43592900 | -1.58636000 | -1.41376500 |
| H  | -3.19586900 | -1.42967900 | -1.98776900 |
| H  | -1.82027700 | -0.84547000 | -1.59677900 |
| O  | -1.43459400 | 2.99814800  | -0.16764800 |
| H  | -1.60055500 | 3.89318600  | 0.15107600  |
| H  | -1.37233200 | 2.44888600  | 0.63273200  |
| O  | -0.57301400 | 0.49383800  | -1.30661000 |
| H  | -0.71860000 | 1.40609000  | -1.60730900 |
| H  | -0.76231900 | 0.57138600  | -0.34093500 |
| O  | -0.95757100 | 0.65593900  | 1.41651500  |
| H  | -0.08558200 | 0.39507100  | 1.74713000  |
| H  | -1.54351400 | -0.12618600 | 1.56235500  |
| O  | -2.65709000 | -1.45743000 | 1.33211900  |
| H  | -2.65760700 | -1.60656700 | 0.35894000  |
| H  | -2.51124300 | -2.32877600 | 1.72057100  |
| H  | 1.14563500  | 0.04629400  | -0.79301700 |
| Br | 2.27393900  | -0.32163800 | 0.03623200  |

-----  
**W5-24B**

|    |             |             |             |
|----|-------------|-------------|-------------|
| O  | 2.09598600  | 1.74489900  | -0.17122600 |
| H  | 2.16762800  | 1.23036800  | -0.98958900 |
| H  | 1.18368700  | 2.10944200  | -0.17459200 |
| O  | 2.76754600  | -0.96724400 | -1.31975800 |
| H  | 3.14544900  | -0.94200700 | -0.42099900 |
| H  | 3.43050500  | -1.40653000 | -1.86711100 |
| O  | 2.59351600  | -0.34134900 | 1.39956900  |
| H  | 2.97574400  | -0.17827600 | 2.26996700  |
| H  | 2.41096000  | 0.54961000  | 0.99843500  |
| O  | -0.51293300 | 2.63091300  | 0.00258600  |
| H  | -1.08533800 | 1.84066500  | 0.00928400  |
| H  | -0.93692600 | 3.23143000  | -0.62355700 |
| H  | -0.78160400 | -1.07017500 | 0.11310900  |
| O  | 0.50948400  | -1.78920200 | 0.25440000  |
| H  | 1.09415200  | -1.33583600 | 0.89964300  |
| H  | 1.03093300  | -1.72363500 | -0.56794200 |
| Br | -2.12182800 | -0.35797700 | -0.02774900 |

-----  
**W5-25B**

|   |             |             |             |
|---|-------------|-------------|-------------|
| O | -2.38327800 | -1.19179700 | -0.46974300 |
| H | -2.43380300 | -0.83786800 | 0.44353600  |
| H | -1.55846800 | -1.69987200 | -0.46885200 |
| O | 2.36879500  | 2.20631700  | 0.19631400  |
| H | 2.62174800  | 1.28190000  | 0.04344200  |
| H | 3.02905200  | 2.72858400  | -0.27623600 |
| O | -2.16724000 | 0.17217700  | 1.97313100  |
| H | -1.53574500 | 0.83953500  | 1.64623600  |
| H | -2.86015700 | 0.67513400  | 2.41849400  |
| H | 0.41457900  | 0.11860800  | 0.15739100  |

|    |             |             |             |
|----|-------------|-------------|-------------|
| O  | -0.30122500 | 1.49751000  | 0.33662400  |
| H  | -0.83331500 | 1.57983300  | -0.49701800 |
| H  | 0.48619200  | 2.07049500  | 0.24862300  |
| O  | -2.02028200 | 1.22002200  | -1.68655000 |
| H  | -1.86410800 | 1.17547400  | -2.63761900 |
| H  | -2.21164400 | 0.29161100  | -1.40465300 |
| Br | 1.22204300  | -1.12735000 | -0.07061600 |

---

**W5-26B**

|    |             |             |             |
|----|-------------|-------------|-------------|
| H  | 1.24078300  | 0.90725400  | -0.49915200 |
| O  | -3.76284200 | 0.45751300  | 0.27748500  |
| H  | -4.40348000 | 0.77614300  | -0.37037200 |
| H  | -3.41848400 | -0.38543700 | -0.10016500 |
| O  | -2.62357100 | -1.80418400 | -0.73640000 |
| H  | -1.75132600 | -2.02239500 | -0.33950100 |
| H  | -3.05607100 | -2.65599500 | -0.86911600 |
| O  | -0.18994200 | -2.40246900 | 0.41968000  |
| H  | -0.17048900 | -2.46855700 | 1.38322200  |
| H  | 0.54896800  | -1.79909200 | 0.21670600  |
| O  | 0.22274800  | 1.82287100  | -1.04455300 |
| H  | 0.59927600  | 2.69545800  | -1.22619400 |
| H  | -0.48640300 | 1.96923800  | -0.35804200 |
| O  | -1.70540900 | 2.15225300  | 0.75221700  |
| H  | -2.47187200 | 1.54614400  | 0.59657300  |
| H  | -1.49541700 | 2.05813500  | 1.68950300  |
| Br | 2.26676100  | -0.06939400 | 0.07226000  |

---

**W5-27B**

|    |             |             |             |
|----|-------------|-------------|-------------|
| O  | 0.26495100  | 1.94574400  | -0.05506500 |
| H  | 1.23413100  | 1.68957800  | -0.32561200 |
| H  | 0.12417900  | 1.73645300  | 0.91208400  |
| O  | 0.70210200  | -1.88105700 | 1.02607900  |
| H  | -0.04973100 | -1.56732400 | 0.47752400  |
| H  | 0.56169100  | -1.43288000 | 1.87235100  |
| O  | -0.58248100 | 0.82976800  | 2.18469900  |
| H  | -1.19864700 | 0.39046300  | 1.54917500  |
| H  | -1.15232100 | 1.22869300  | 2.85643000  |
| O  | 2.58719600  | 1.30103500  | -0.78688000 |
| H  | 3.35285200  | 1.80055100  | -0.47674700 |
| H  | 2.79477500  | 0.33553800  | -0.62566700 |
| H  | -0.38660800 | 1.25305200  | -0.47909100 |
| O  | 2.99104200  | -1.24021600 | -0.24308800 |
| H  | 2.17219600  | -1.53966900 | 0.22831400  |
| H  | 3.12042100  | -1.87831200 | -0.95592000 |
| Br | -1.66501200 | -0.27595300 | -0.62968000 |

---

**W5-28B**

|   |             |             |             |
|---|-------------|-------------|-------------|
| O | -1.36975300 | -2.12720800 | -0.46521200 |
| O | 0.38707700  | -1.25343900 | 1.34142100  |
| O | -0.61295000 | 1.41489900  | 1.02902300  |
| O | -2.49349600 | 0.29210400  | -0.70811400 |
| O | -5.26931800 | 0.70431500  | -0.05810200 |
| H | -1.86276100 | -1.27719400 | -0.61567500 |
| H | -1.01823100 | -2.36558100 | -1.33244900 |
| H | -0.23454500 | -1.68825000 | 0.69569100  |
| H | 0.54189100  | -1.89603400 | 2.04517800  |

|    |             |             |             |
|----|-------------|-------------|-------------|
| H  | -0.26519700 | 0.56647900  | 1.36154200  |
| H  | 0.15182600  | 1.80751200  | 0.58427200  |
| H  | -1.92590300 | 0.82650400  | -0.11345000 |
| H  | -3.41094100 | 0.46762200  | -0.43531000 |
| H  | -5.79249500 | 1.08114800  | -0.77784300 |
| H  | -5.76979600 | -0.07302800 | 0.22279300  |
| H  | 1.73146600  | -0.51498800 | 0.44625300  |
| Br | 2.64920600  | 0.30915600  | -0.31980400 |

---

**W5-29B**

|    |             |             |             |
|----|-------------|-------------|-------------|
| O  | -0.03773700 | 1.18161400  | -1.70139100 |
| H  | -0.79227400 | 1.64542300  | -1.12457400 |
| H  | -0.37225500 | 0.28394700  | -1.95651100 |
| O  | -2.38664200 | -1.84947900 | 0.51334800  |
| H  | -3.29919900 | -1.99325900 | 0.23412000  |
| H  | -1.85928200 | -1.86107800 | -0.30672100 |
| O  | -0.42404800 | -1.49389600 | -1.55939800 |
| H  | 0.31639900  | -1.35892400 | -0.91195200 |
| H  | -0.10598600 | -2.18266700 | -2.15962800 |
| H  | 0.68987100  | 0.90797800  | -1.00289400 |
| O  | -1.81464400 | 2.12246000  | -0.22769800 |
| H  | -1.76809900 | 3.04481200  | 0.05598800  |
| H  | -1.68632800 | 1.55414000  | 0.60120900  |
| O  | -1.34699900 | 0.47047100  | 1.71880800  |
| H  | -1.78252700 | -0.36688800 | 1.45551400  |
| H  | -0.39372100 | 0.27359000  | 1.61672000  |
| Br | 1.68954200  | -0.09704100 | 0.38712500  |

---

**W5-30B**

|    |             |             |             |
|----|-------------|-------------|-------------|
| O  | 0.92880400  | 2.71525800  | 0.23117500  |
| O  | -0.65152700 | -1.17124800 | 0.64915100  |
| O  | -1.33337100 | 1.15528600  | -0.27434600 |
| O  | -4.05904500 | 0.90680600  | -0.07721000 |
| O  | -3.30934200 | -1.79393000 | -0.20053400 |
| H  | 1.28195400  | 3.36436600  | -0.39105000 |
| H  | 1.50137100  | 1.93762200  | 0.11394500  |
| H  | 0.99249700  | -0.93028700 | 0.20821100  |
| H  | -0.92391800 | -0.23764400 | 0.38577600  |
| H  | -0.67009500 | -1.18159000 | 1.61712600  |
| H  | -2.26966400 | 1.39623500  | -0.13173100 |
| H  | -0.75917500 | 1.91969500  | -0.08327600 |
| H  | -4.71539100 | 1.03449500  | 0.61809400  |
| H  | -3.92380300 | -0.06396800 | -0.12522100 |
| H  | -2.35480400 | -1.77333600 | 0.01011500  |
| H  | -3.36538200 | -2.24904300 | -1.05019800 |
| Br | 2.36006500  | -0.50611200 | -0.10850500 |

---

**W5-31B**

|   |             |             |             |
|---|-------------|-------------|-------------|
| O | 0.32800900  | 2.68637900  | -0.10271600 |
| H | 0.66485000  | 3.14974800  | -0.87985200 |
| H | 0.78135100  | 1.81174000  | -0.10745500 |
| O | 1.31110000  | 0.12281400  | 0.04129500  |
| H | 1.89666400  | -0.20940900 | -0.67265000 |
| H | 0.50384500  | -0.42048500 | 0.00370800  |
| H | -2.11959500 | 0.40165200  | 0.00590500  |

|    |             |             |             |
|----|-------------|-------------|-------------|
| O  | 3.56055800  | -0.54785800 | -1.39463000 |
| H  | 3.95412100  | -0.59125800 | -0.50007300 |
| H  | 3.83477500  | -1.36284900 | -1.83293800 |
| O  | -2.27476900 | 1.96605100  | -0.01625600 |
| H  | -1.35006100 | 2.32275800  | -0.05018700 |
| H  | -2.64403800 | 2.29200400  | 0.81635900  |
| O  | 3.73847500  | -0.44331900 | 1.38800500  |
| H  | 2.80259000  | -0.18377600 | 1.29127000  |
| H  | 4.11463000  | 0.18710900  | 2.01427500  |
| Br | -1.87846100 | -1.07627900 | 0.01674400  |

---

**W5-32B**

|    |             |             |             |
|----|-------------|-------------|-------------|
| O  | -0.08772300 | 1.76178300  | -0.37123200 |
| H  | -0.03691100 | 2.13237900  | -1.26347300 |
| H  | 0.62076300  | 1.06734900  | -0.33171600 |
| O  | 1.65735900  | -0.26363000 | -0.05943100 |
| H  | 2.39221400  | -0.40758000 | -0.68992600 |
| H  | 1.11213200  | -1.07977800 | -0.05143600 |
| O  | -0.21947900 | -2.27947200 | 0.15415500  |
| H  | -0.41212200 | -2.98102500 | -0.48113300 |
| H  | -1.03582500 | -1.74721800 | 0.17912500  |
| O  | 4.13950900  | -0.07670500 | -1.26065900 |
| H  | 4.38969300  | 0.16341500  | -0.34526300 |
| H  | 4.80657300  | -0.71286400 | -1.54612100 |
| H  | -1.42445100 | 0.97247700  | -0.16621000 |
| O  | 3.93026700  | 0.41180900  | 1.47636000  |
| H  | 2.99082000  | 0.22237000  | 1.28869400  |
| H  | 3.92549600  | 1.22234200  | 2.00016800  |
| Br | -2.64822400 | 0.13479600  | 0.05410700  |

---

**W5-33B**

|    |             |             |             |
|----|-------------|-------------|-------------|
| O  | 1.83636200  | -1.22721600 | -0.39622500 |
| H  | 2.01470600  | -0.85852400 | 0.53520600  |
| H  | 2.02340400  | -0.43461200 | -1.00567000 |
| O  | -2.26245400 | 2.21439200  | 0.05808900  |
| H  | -2.27571800 | 1.24919000  | -0.08144300 |
| H  | -3.12366800 | 2.41421400  | 0.44543400  |
| O  | 2.11112200  | 0.02673100  | 1.86316500  |
| H  | 1.51697000  | 0.77526200  | 1.62979500  |
| H  | 1.70223800  | -0.38467500 | 2.63738300  |
| O  | 2.05651100  | 0.99550800  | -1.68927800 |
| H  | 2.87274200  | 1.49261900  | -1.82710700 |
| H  | 1.51443800  | 1.51697400  | -1.05193600 |
| O  | 0.46016500  | 1.66953400  | 0.41389900  |
| H  | -0.08539500 | 0.85530100  | 0.26206600  |
| H  | -0.24452800 | 2.33885600  | 0.48580800  |
| H  | 0.79946500  | -1.32046900 | -0.40070200 |
| Br | -1.15223700 | -1.05930700 | -0.10360100 |

---

**W5-34B**

|   |             |             |             |
|---|-------------|-------------|-------------|
| H | 0.75494700  | -0.77716000 | -0.46304200 |
| O | -2.62207200 | -1.82428000 | 1.36034000  |
| H | -2.94749300 | -2.15315400 | 2.20664300  |
| H | -2.62954500 | -0.85440200 | 1.44209800  |
| O | -0.80496800 | -1.07360100 | -0.72175400 |
| H | -1.12643700 | -1.88624000 | -0.29398200 |

|    |             |             |             |
|----|-------------|-------------|-------------|
| H  | -1.20869100 | -0.37570100 | -0.14518700 |
| O  | -2.04770300 | 0.89871000  | 0.69559900  |
| H  | -2.41066700 | 1.25982700  | -0.13311100 |
| H  | -1.31725900 | 1.49961800  | 0.95827100  |
| O  | 0.30784400  | 2.19172600  | 1.37343600  |
| H  | 0.97678400  | 1.58157900  | 1.01394700  |
| H  | 0.59106800  | 3.06331900  | 1.06819500  |
| O  | -2.40218400 | 0.92880900  | -2.10607300 |
| H  | -3.00356400 | 0.88944900  | -2.85948600 |
| H  | -1.94848800 | 0.06900700  | -2.09434600 |
| Br | 2.13777200  | -0.32248700 | -0.15749700 |

---

**W5-35B**

|    |             |             |             |
|----|-------------|-------------|-------------|
| O  | 0.69739500  | 2.34603200  | 0.00668600  |
| H  | 0.87562900  | 2.87101900  | -0.78564600 |
| H  | -0.26439600 | 2.12995700  | -0.03431000 |
| O  | -3.08357800 | -0.39201700 | -1.92996600 |
| H  | -3.52776200 | -0.89995000 | -2.61906500 |
| H  | -2.48913900 | -1.02424900 | -1.48965400 |
| O  | -1.83518700 | 1.30555100  | 0.05487300  |
| H  | -2.51902200 | 1.40286400  | -0.62664100 |
| H  | -1.53240800 | 0.38238600  | -0.10146400 |
| O  | -1.15944700 | -1.39276400 | -0.06694100 |
| H  | -1.42113200 | -1.43357600 | 0.87315600  |
| H  | -0.18744600 | -1.42623900 | -0.06743700 |
| H  | 1.48237400  | 0.91586600  | -0.04677100 |
| O  | -2.12036900 | -0.41033600 | 2.35835000  |
| H  | -2.77795600 | -0.45843200 | 3.06229500  |
| H  | -2.30412800 | 0.41793600  | 1.88203300  |
| Br | 2.13356800  | -0.41512300 | -0.09801500 |

---

**W5-36B**

|    |             |             |             |
|----|-------------|-------------|-------------|
| O  | -3.10659300 | 2.10643400  | 0.71335500  |
| H  | -3.15505700 | 1.13328600  | 0.73088000  |
| H  | -4.02271800 | 2.40810000  | 0.73654200  |
| O  | -2.19462900 | -0.59283600 | 0.21521200  |
| H  | -1.72666700 | 0.06091800  | -0.36042700 |
| H  | -1.54636500 | -0.78293300 | 0.91388300  |
| H  | 1.31031000  | -0.59109300 | 0.46753900  |
| O  | -1.26976400 | -3.01754500 | -0.81157300 |
| H  | -1.10294500 | -3.04139800 | -1.76236000 |
| H  | -1.81859700 | -2.21704700 | -0.66495100 |
| O  | -1.11921400 | 1.47790200  | -1.21100500 |
| H  | -1.64608500 | 2.09672400  | -0.67248600 |
| H  | -0.19736800 | 1.61867200  | -0.94478000 |
| O  | 0.33229400  | -1.90743900 | 1.07552800  |
| H  | -0.06665600 | -2.47263300 | 0.37100300  |
| H  | 0.77724900  | -2.51186800 | 1.68386600  |
| Br | 2.05880400  | 0.56477600  | -0.01002400 |

---

**W5-37B**

|   |             |            |             |
|---|-------------|------------|-------------|
| O | 0.14178500  | 2.36895300 | 0.53426900  |
| O | -1.80243100 | 0.71211100 | 1.17638000  |
| O | 1.77323100  | 0.58701900 | -0.78359800 |
| O | 4.42955800  | 0.39933100 | 0.24459200  |

|    |             |             |             |
|----|-------------|-------------|-------------|
| O  | -2.37076200 | 2.72553200  | -0.85956500 |
| H  | 0.78114700  | 1.80872000  | 0.03647100  |
| H  | -0.40881400 | 2.78723100  | -0.15065300 |
| H  | -1.02006700 | 1.33565800  | 1.09298800  |
| H  | -2.02358700 | 0.67678400  | 2.11665300  |
| H  | -1.21661900 | -0.71627300 | 0.54194500  |
| H  | 1.31802900  | -0.26553600 | -0.69795400 |
| H  | 2.66975200  | 0.43716500  | -0.43038300 |
| H  | 5.11209300  | 0.69074900  | -0.37451000 |
| H  | 4.56470300  | 0.94925700  | 1.02792900  |
| H  | -2.56841000 | 1.95054100  | -0.30659100 |
| H  | -2.72257400 | 2.50419100  | -1.73080200 |
| Br | -0.62447700 | -1.90005900 | -0.10347800 |

-----  
**W5-38B**

|    |             |             |             |
|----|-------------|-------------|-------------|
| H  | -1.12011200 | -0.31459200 | -0.10513200 |
| O  | 0.45948400  | 0.19925700  | -0.24207300 |
| H  | 0.26613700  | 1.15005500  | -0.11233300 |
| H  | 1.00977500  | -0.07918800 | 0.51651700  |
| O  | 4.25966500  | 0.90680200  | 0.15511800  |
| H  | 3.90021700  | 0.38261300  | 0.89177500  |
| H  | 5.12062900  | 1.21838300  | 0.45930200  |
| O  | 2.87717000  | -1.08043900 | -1.39966100 |
| H  | 3.51494700  | -0.35473400 | -1.27466400 |
| H  | 2.03324000  | -0.61543700 | -1.53031400 |
| O  | -0.93013300 | 2.60296400  | -0.09276000 |
| H  | -1.76553700 | 2.11520600  | -0.00582800 |
| H  | -1.01502400 | 3.34923700  | 0.51415300  |
| O  | 2.49549100  | -1.03051500 | 1.28132600  |
| H  | 2.66955200  | -1.33779600 | 0.35781500  |
| H  | 2.43696900  | -1.82571800 | 1.82506500  |
| Br | -2.58126300 | -0.47064500 | 0.02423000  |

-----  
**W5-39B**

|    |             |             |             |
|----|-------------|-------------|-------------|
| O  | 1.56743200  | 2.34535300  | 0.09556600  |
| H  | 0.65370300  | 1.99468700  | 0.01120400  |
| H  | 1.70677100  | 2.88426100  | -0.69490100 |
| O  | -0.68145400 | 0.74051100  | -0.10225500 |
| H  | -0.13630200 | -0.06185200 | -0.06182100 |
| H  | -1.32904700 | 0.64703900  | 0.62359600  |
| O  | -3.35991900 | -1.90598900 | -0.03360100 |
| H  | -3.38828600 | -1.36715900 | 0.77548700  |
| H  | -3.75279200 | -2.75372200 | 0.20659500  |
| O  | -3.39561200 | 0.63554300  | -1.35264600 |
| H  | -3.53285200 | -0.32824700 | -1.31778600 |
| H  | -2.42926400 | 0.71325300  | -1.42796200 |
| H  | 2.28030000  | 0.76689600  | 0.03797900  |
| O  | -3.10258100 | 0.57082000  | 1.34559300  |
| H  | -3.41832500 | 0.80804800  | 0.44039700  |
| H  | -3.52468700 | 1.19021200  | 1.95330100  |
| Br | 2.53279600  | -0.67380900 | -0.00478100 |

-----  
**W5-40B**

|   |             |             |             |
|---|-------------|-------------|-------------|
| O | -3.25372600 | -0.42615500 | -0.88514900 |
| H | -2.37966000 | -0.01469000 | -0.77819400 |
| H | -3.89855800 | 0.28158700  | -0.70729900 |

|    |             |             |             |
|----|-------------|-------------|-------------|
| O  | 1.06058800  | 1.26940800  | 1.77842300  |
| H  | 0.31882500  | 0.77917800  | 1.35680700  |
| H  | 0.83414800  | 2.20419700  | 1.68071800  |
| O  | -5.24293300 | 1.58028500  | -0.36938800 |
| H  | -5.78453700 | 1.45606800  | 0.42123600  |
| H  | -5.88151600 | 1.73504200  | -1.07797000 |
| O  | -0.51971600 | -0.32339200 | 0.17825900  |
| H  | -0.94237900 | -1.14851700 | 0.50567500  |
| H  | 0.25839000  | -0.61140200 | -0.32436700 |
| O  | -2.31689000 | -2.28349800 | 0.89861800  |
| H  | -2.36018900 | -3.20442500 | 0.61345300  |
| H  | -2.88621100 | -1.78743400 | 0.26933200  |
| H  | 2.21267300  | 0.70377100  | 0.64529200  |
| Br | 2.93401200  | 0.03067000  | -0.44030800 |

-----  
**W5-41B**

|    |             |             |             |
|----|-------------|-------------|-------------|
| O  | 4.09884200  | -0.98000300 | 0.50719900  |
| H  | 3.16940900  | -1.02339700 | 0.79165600  |
| H  | 4.62113700  | -1.13926000 | 1.30267500  |
| O  | 1.33797300  | -0.15001300 | 0.33187100  |
| H  | 1.84667100  | 0.32594100  | -0.36674600 |
| H  | 0.62118500  | -0.63698800 | -0.13262500 |
| O  | -1.79815100 | 2.37938600  | -0.14030400 |
| H  | -2.03924300 | 1.50919900  | -0.53017300 |
| H  | -1.44102200 | 2.89708400  | -0.87405400 |
| O  | -0.54788700 | 0.96944300  | 1.64461700  |
| H  | -0.88450100 | 1.73596100  | 1.08160700  |
| H  | 0.34709100  | 0.69621300  | 1.22979300  |
| O  | 3.24737800  | 1.03614800  | -1.19728600 |
| H  | 3.86678400  | 0.43704400  | -0.73444100 |
| H  | 3.42126800  | 0.90164700  | -2.13757300 |
| H  | -1.12814500 | 0.20678200  | 1.21387800  |
| Br | -1.80302500 | -0.91285500 | -0.28607900 |

-----
